# Supplementary material for: Diabetes as a risk factor for the onset of frozen shoulder: a systematic review and meta-analysis
Source: PubMed Central journal article supplement (PMC9815013; doi:10.1136/bmjopen-2022-062377), 2023-01-04
Supplement: bmjopen-2022-062377.draft_revisions.pdf [file bmjopen-2022-062377.draft_revisions.pdf]

# BMJ Open

BMJ Open is committed to open peer review. As part of this commitment we make the peer review history of every article we publish publicly available.

When an article is published we post the peer reviewers' comments and the authors' responses online. We also post the versions of the paper that were used during peer review. These are the versions that the peer review comments apply to.

The versions of the paper that follow are the versions that were submitted during the peer review process. They are not the versions of record or the final published versions. They should not be cited or distributed as the published version of this manuscript.

BMJ Open is an open access journal and the full, final, typeset and author-corrected version of record of the manuscript is available on our site with no access controls, subscription charges or pay-per-view fees (<http://bmjopen.bmj.com>).

If you have any questions on BMJ Open's open peer review process please email [info.bmjopen@bmj.com](mailto:info.bmjopen@bmj.com)

# BMJ Open

## Diabetes as a Risk Factor for the Onset of Frozen Shoulder: A Systematic Review and Meta-Analysis

|                               |                                                                                                                                                                                                                                                                                                                                                                                                                                                                                             |
|-------------------------------|---------------------------------------------------------------------------------------------------------------------------------------------------------------------------------------------------------------------------------------------------------------------------------------------------------------------------------------------------------------------------------------------------------------------------------------------------------------------------------------------|
| Journal:                      | <i>BMJ Open</i>                                                                                                                                                                                                                                                                                                                                                                                                                                                                             |
| Manuscript ID                 | bmjopen-2022-062377                                                                                                                                                                                                                                                                                                                                                                                                                                                                         |
| Article Type:                 | Original research                                                                                                                                                                                                                                                                                                                                                                                                                                                                           |
| Date Submitted by the Author: | 28-Feb-2022                                                                                                                                                                                                                                                                                                                                                                                                                                                                                 |
| Complete List of Authors:     | Dyer, Brett; Keele University, Primary Care Centre Versus Arthritis, School of Medicine<br>Rathod, Trishna; Keele University, Primary Care Centre Versus Arthritis, School of Medicine<br>Burton, Claire; Keele University, Primary Care Centre Versus Arthritis, School of Medicine<br>van der Windt, Danielle; Keele University, Primary Care Centre Versus Arthritis, School of Medicine<br>Bucknall, Milica; Keele University, Primary Care Centre Versus Arthritis, School of Medicine |
| Keywords:                     | DIABETES & ENDOCRINOLOGY, EPIDEMIOLOGY, PRIMARY CARE, RHEUMATOLOGY                                                                                                                                                                                                                                                                                                                                                                                                                          |
|                               |                                                                                                                                                                                                                                                                                                                                                                                                                                                                                             |

SCHOLARONE™  
Manuscripts

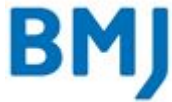

I, the Submitting Author has the right to grant and does grant on behalf of all authors of the Work (as defined in the below author licence), an exclusive licence and/or a non-exclusive licence for contributions from authors who are: i) UK Crown employees; ii) where BMJ has agreed a CC-BY licence shall apply, and/or iii) in accordance with the terms applicable for US Federal Government officers or employees acting as part of their official duties; on a worldwide, perpetual, irrevocable, royalty-free basis to BMJ Publishing Group Ltd ("BMJ") its licensees and where the relevant Journal is co-owned by BMJ to the co-owners of the Journal, to publish the Work in this journal and any other BMJ products and to exploit all rights, as set out in our [licence](#).

The Submitting Author accepts and understands that any supply made under these terms is made by BMJ to the Submitting Author unless you are acting as an employee on behalf of your employer or a postgraduate student of an affiliated institution which is paying any applicable article publishing charge ("APC") for Open Access articles. Where the Submitting Author wishes to make the Work available on an Open Access basis (and intends to pay the relevant APC), the terms of reuse of such Open Access shall be governed by a Creative Commons licence – details of these licences and which [Creative Commons](#) licence will apply to this Work are set out in our licence referred to above.

Other than as permitted in any relevant BMJ Author's Self Archiving Policies, I confirm this Work has not been accepted for publication elsewhere, is not being considered for publication elsewhere and does not duplicate material already published. I confirm all authors consent to publication of this Work and authorise the granting of this licence.

## Title Page

**Authors:** Brett P Dyer, Trishna Rathod-Mistry, Claire Burton, Danielle A van der Windt, Miliča Blagojevic-Bucknall.

**Title:** Diabetes as a Risk Factor for the Onset of Frozen Shoulder: A Systematic Review and Meta-Analysis.

**Affiliation:** Primary Care Centre Versus Arthritis, School of Medicine, Keele University, Staffordshire, UK

**Corresponding Author:** Brett P Dyer. **Email:** [b.p.dyer@keele.ac.uk](mailto:b.p.dyer@keele.ac.uk)

**ORCID ID's:** Brett P Dyer: 0000-0001-8039-7631, Trishna Rathod-Mistry: 0000-0002-6369-4746, Claire Burton 0000-0003-4688-3075, Danielle A van der Windt: 0000-0002-7248-6703, Miliča Blagojevic-Bucknall: 0000-0001-7230-7771.

**Author contributions:** All authors contributed to the conception of the study and systematic review study selection. Data extraction and risk of bias assessment was performed by BPD, MB-B and TR-M. BPD performed the meta-analysis and narrative synthesis of the results and drafted the initial manuscript. All authors contributed to editing and approval of the final manuscript.

**Funding:** This work was supported by Versus Arthritis grant number 21899. Claire Burton is funded by an NIHR (National Institute for Health Research) Clinical Lectureship. The views expressed are those of the authors and not necessarily those of the National Health Service, the NIHR, or the Department of Health and Social Care.

**Ethics approval:** No Ethics Committee or Institutional Board approval is required.

**Data availability:** Data have been included in Table 1 and Appendix Table C.1.

**Conflicts of interest statement:** The authors have no conflicts of interest.

**Word count:** 2871 words.

## Title

Diabetes as a Risk Factor for the Onset of Frozen Shoulder: A Systematic Review and Meta-Analysis

## Abstract

**Objective** Summarise longitudinal observational studies to determine whether diabetes (types 1 and 2) is a risk factor for the onset of frozen shoulder.

**Methods** Studies were identified through a systematic literature search of eleven bibliographic databases, reference screening and emailing professional contacts. Longitudinal observational studies that estimated the association between diabetes and developing frozen shoulder were eligible. Risk of bias was judged using the Quality In Prognosis Studies tool. For studies providing sufficient data, random-effects meta-analysis was used to derive summary estimates of the association between diabetes and the onset of frozen shoulder.

**Results** A meta-analysis of six case-control studies including 5388 people estimated the odds of developing frozen shoulder for people with diabetes to be 3.69 (95% CI: 2.99, 4.56) times the odds for people without diabetes. Two cohort studies were identified, both suggesting diabetes was associated with the onset of frozen shoulder, with hazard ratios of 1.32 (95% CI: 1.22, 1.42) and 1.67 (95% CI: 1.46, 1.91). Risk of bias was judged as high in seven studies and moderate in one study.

**Conclusions** People with diabetes are more likely to develop frozen shoulder. High-quality studies are needed to confirm the strength and understand reasons for the association.

**PROSPERO registration number** CRD42019122963.

**Keywords:** Diabetes, Frozen shoulder, Adhesive capsulitis, Meta-analysis

## Strengths and limitations of this study

- This systematic review is the first to summarise the results of longitudinal observational studies estimating the association between diabetes and the onset of frozen shoulder.
- Robust meta-analytic methods were used to synthesise and analyse data.
- Sensitivity to influential estimates and sensitivity to small study bias were assessed.
- Risk of bias was judged as high in seven studies and moderate in one study, limiting the certainty in evidence.
- Only two cohort studies were identified which meant that pooling of association estimates was not suitable.

## 1 - Introduction

Frozen shoulder, also known as adhesive capsulitis, is a painful and severely debilitating condition. The inflammatory contracture of the glenohumeral joint capsule in frozen shoulder restricts both active and passive range of motion, with loss of external rotation being especially characteristic of this condition [1].

Frozen shoulder generally presents between the ages of 50 and 60 years and rarely presents before 40 years [2]. Women (58%) are more likely to develop frozen shoulder than men (42%) [3]. The contralateral shoulder is also affected in 6% to 17% of patients [4]. Although the exact aetiology remains unclear, several factors have been found to be associated with frozen shoulder, including type 1 and type 2 diabetes and other metabolic factors, trauma, thyroid dysfunction, cardiovascular disease, and other musculoskeletal conditions such as Dupuytren's contracture [5].

1  
2  
3 The prevalence of frozen shoulder in the general population has been estimated at 2%. However, due  
4 to a high rate of misdiagnosis, this figure may be misleading, with the true prevalence of frozen shoulder in the  
5 general population more likely to be around 0.75% [1]. A meta-analysis of 13 cross-sectional studies estimated  
6 the prevalence of frozen shoulder in populations with diabetes to be 13.4% (95% confidence interval (CI):  
7 10.2%, 17.2%), although there was substantial between-study heterogeneity [6]. Building on the work of (Zreik  
8 et al. 2016), this systematic review aims to summarise evidence from longitudinal observational studies to  
9 understand the temporal relationship between diabetes and frozen shoulder. It has been hypothesised that  
10 diabetes causes frozen shoulder. The evidence of a potential temporal relationship summarised in this  
11 systematic review is necessary (although it is not sufficient) to determine whether the association between  
12 diabetes and frozen shoulder is causal [7].  
13  
14  
15

## 16 **2 - Methods**

17  
18 The protocol for this systematic review was registered on PROSPERO (CRD42019122963) and the review was  
19 conducted and reported using PRISMA guidelines [8]. A systematic literature search of MEDLINE, EMBASE,  
20 AMED, PsycINFO, Web of Science core collection, CINAHL, Epistemonikos, Trip, PEDro, OpenGrey, and The  
21 Grey Literature Report was carried out in January 2019 and updated in June 2021. Reference lists of eligible  
22 studies were screened. Additionally, a professional contact of one author (DAvdW) was contacted to identify  
23 further studies. We retrieved all epidemiological studies containing index terms (e.g. Medical Subject  
24 Headings) and free-text words related to diabetes and shoulder pain more generally (not limited to frozen  
25 shoulder) to reduce the risk of missing potentially relevant publications. The search strategy for MEDLINE,  
26 which was constructed with the support of a health information specialist, can be found in Appendix A.  
27  
28

29 Reviewer BPD screened all titles and abstracts to check eligibility using the pre-defined inclusion and  
30 exclusion criteria, and reviewers MB-B and CB independently checked a 20% random sample. Reviewer BPD  
31 checked all full-texts for eligibility using the inclusion and exclusion criteria, and reviewers MB-B, CB, TR-M also  
32 independently checked eligibility. Disagreements regarding the inclusion of studies were resolved through  
33 discussion with DAvdW.  
34

35 To be eligible for inclusion, studies were required to have a longitudinal, prospective or retrospective,  
36 observational study design. Cohort studies were required to have a study population consisting of people  
37 without frozen shoulder at inclusion and must have established whether diabetes was present at baseline (all  
38 types of diabetes were considered). Case-control studies were required to have a study population consisting  
39 of people with frozen shoulder and a control group without frozen shoulder, with diabetes defined as the  
40 exposure of interest. The paper must have presented an odds ratio, risk ratio or hazard ratio, or they must  
41 have presented sufficient data to allow the associations to be estimated. There were no restrictions to setting;  
42 population based as well as clinical cohorts were eligible. All non-English language papers were assessed by a  
43 reviewer with appropriate language skills. Cross-sectional studies and case series were excluded, as were  
44 studies where a full text could not be obtained.  
45

46 Data extraction was completed by reviewer BPD and was independently checked by reviewers MB-B  
47 and TR-M. Types of data extracted included details of study design, setting, sample characteristics,  
48 exposure/outcome/covariate measurement, inclusion and exclusion criteria, sample size, attrition, covariate  
49 conditioning, follow-up time, statistical analysis, association estimates (odds ratio, risk ratio or hazard ratio) or  
50 raw data to estimate association sizes if they were not already presented. Risk of bias was independently  
51 assessed by pairs of reviewers (BPD, MB-B, TR-M). Risk of bias was judged using the Quality In Prognosis  
52 Studies (QUIPS) tool [9]. The QUIPS tool covers six domains: (1) study participation, (2) study attrition, (3)  
53 prognostic/risk factor measurement, (4) outcome measurement, (5) study confounding, (6) statistical analysis  
54 and reporting. Each of the six domains is scored as being at a low, medium, or high risk of bias [9]. Domain  
55 scores were used to guide judgement of the overall risk of bias (scored as low, medium or high) for the study.  
56 Overall risk of bias was based on author judgement and the use of a tallied or summated score was avoided.  
57 All disagreements regarding data extraction and assessment of risk of bias were resolved by discussion.  
58  
59  
60

Case-control studies and cohort studies were analysed separately. Narrative synthesis was used where less than five studies were present and a random-effects meta-analysis model was used to estimate a summary estimate when five or more studies were present. Where adjusted and crude estimates were both presented, the adjusted estimate was used. Where a zero-cell count was present within the results of a study, a continuity correction of 0.5 was added to all cells for that study. Restricted maximum likelihood estimation [10] was used to estimate the between-study variance,  $\tau^2$ , and the Hartung-Knapp-Sidik-Jonkman variance correction method [11] was used in the estimation of the pooled effect confidence interval. Heterogeneity was assessed using Cochran's Q statistic, complemented by the  $I^2$  index [12]. Prediction intervals were not estimated since they are inaccurate when there is little heterogeneity ( $I^2 < 0.3$ ), or an imbalance in study sizes exists, both of which were found in the meta-analysis in this review (see Section 3) [13]. Evidence of small-study bias was assessed with a funnel plot of log odds ratios against their standard errors [14]. A test for funnel plot asymmetry was not used since the meta-analysis included less than ten studies [15]. The influence of each study on the overall pooled estimate was assessed by repeating the meta-analysis, each time leaving out a single study [16]. Statistical analysis was carried out using Stata version 16.1 [17].

## 2.1 - Patient and Public Involvement

No patient involved.

## 3 - Results

The searches identified 1784 unique citations, 12 of which were selected for full-text screening, and eight studies consisting of a total of 346,278 people fulfilled the inclusion criteria (Figure 1). Table 1 summarises information on risk of bias, study design, setting, participants, sample size, and methods used for diagnosing diabetes and frozen shoulder. Of the eight studies that met the criteria for inclusion, six had case-control designs and two had cohort designs. Three studies (including the two cohort studies) collected information

**Table 1.** Characteristics of Studies on diabetes as a risk factor for the onset of frozen shoulder

| Source                                | Risk of Bias (QUIPS, overall assessment) | Design and Setting                                                      | % Female                            | Mean Age (years)            | Sample Size               | Method to diagnose diabetes and frozen shoulder                                | Variables conditioned on                                                          |
|---------------------------------------|------------------------------------------|-------------------------------------------------------------------------|-------------------------------------|-----------------------------|---------------------------|--------------------------------------------------------------------------------|-----------------------------------------------------------------------------------|
| <b>Case-control studies</b>           |                                          |                                                                         |                                     |                             |                           |                                                                                |                                                                                   |
| K. L. Boyle-Walker, et al., 1997 [18] | High                                     | Sex-Matched Case-Control at Physical Therapy Clinic in the USA          | Case Group: 75%, Control Group: 68% | Not reported                | Cases: 32, Controls: 31   | Diabetes: Self-reported Questionnaire<br>Frozen shoulder: Clinically diagnosed | Sex-matched                                                                       |
| W. Li, et al., 2014 [19]              | High                                     | Hospital based case-control matched on time of hospitalisation in China | Case Group: 63%, Control Group: 55% | Cases: 57.2, Controls: 45.9 | Cases: 182, Controls: 196 | Diabetes: Face-to-face interview<br>Frozen shoulder: Clinically diagnosed      | Matched on time of hospitalisation, adjusted for history of minor shoulder trauma |
| S-Y. Lee, et al., 2012 [20]           | High                                     | Hospital based age- and                                                 | Case Group:                         | Cases: 52.8,                | Cases: 40, Controls:      | Diabetes: Unclear<br>Frozen                                                    | Age- and sex-matched                                                              |

from electronic health records, four studies were hospital-based, and one study was based in a physical therapy clinic. Among the case-control studies, the percentage of female cases ranged from 52% to 75% and the mean age for cases ranged from 52.8 years to 57.2 years.

|                                |          |                                                                                             |                                            |                                              |                                                 |                                                                                                                                                          |                                                                                                                                        |
|--------------------------------|----------|---------------------------------------------------------------------------------------------|--------------------------------------------|----------------------------------------------|-------------------------------------------------|----------------------------------------------------------------------------------------------------------------------------------------------------------|----------------------------------------------------------------------------------------------------------------------------------------|
|                                |          | sex-matched case-control in South Korea                                                     | 55%, Control Group: not reported           | Controls: not reported                       | 40                                              | shoulder: Clinically diagnosed                                                                                                                           |                                                                                                                                        |
| C. Milgrom, et al., 2008 [21]  | High     | Hospital based age-matched case-control in Israel                                           | Case Group: 60%, Control Group: 65%        | Cases: 54.9, Controls: 55.4                  | Cases: 126, Controls: 98                        | Diabetes: If patient was receiving drug treatment for Diabetes or whose serum glucose was higher than 200 mg/dl<br>Frozen shoulder: Clinically diagnosed | Age-matched                                                                                                                            |
| K. Wang, et al., 2013 [22]     | High     | Hospital based age- and sex-matched case-control in Australia                               | Case Group: 64%, Control Group: 58%        | Cases: 56, Controls: 55.3                    | Cases: 87, Controls: 176                        | Diabetes: Self-reported<br>Frozen shoulder: Clinically diagnosed                                                                                         | Age- and sex-matched                                                                                                                   |
| K. Kingston, et al., 2018 [23] | High     | Sex-matched case-control using electronic health records in the USA                         | Case Group: 58%, Control Group: 58%        | Cases: 56.4, Controls: Not Reported          | Cases: 2190, Controls: 2190                     | Diabetes: ICD-9 Code<br>Frozen shoulder: ICD-9 Code                                                                                                      | Sex-matched                                                                                                                            |
| <b>Cohort studies</b>          |          |                                                                                             |                                            |                                              |                                                 |                                                                                                                                                          |                                                                                                                                        |
| Y-P. Huang, et al., 2013 [24]  | High     | Age- and sex-matched cohort with 3-year follow-up using electronic health records in Taiwan | Exposed Group: 47%, Non-Exposed Group: 47% | Exposed Group: 55.7, Non-Exposed Group: 55.5 | Exposed Group: 78827, Non-Exposed Group: 236481 | Diabetes: ICD-9 Code<br>Frozen shoulder: ICD-9 Code                                                                                                      | Age- and sex-matched. Multivariable analysis adjusted for age, sex, dyslipidaemia                                                      |
| S-F. Lo, et al., 2013 [25]     | Moderate | Cohort with 8-year follow-up using electronic health records in Taiwan                      | Exposed Group: 52%, Non-Exposed Group: 51% | Not reported                                 | Exposed Group: 5109, Non-Exposed Group: 20473   | Diabetes: ICD-9 Code<br>Frozen shoulder: ICD-9 Code                                                                                                      | Multivariable analysis adjusted for age, income, stroke, hypertension, hyperlipidaemia, obesity, chronic obstructive pulmonary disease |

Presence of diabetes was identified using ICD-9 codes (codes to classify diseases, symptoms, clinical findings and causes of disease and injury) from electronic health records in three studies, self-reported in three studies, identified with a glucose test or if the patient was receiving drug treatment for diabetes in one study, and was unclear in one study. Frozen shoulder was identified using ICD-9 codes in three studies and was



1  
2  
3 diagnosed clinically in five studies. Reporting of the types of diabetes was poor, with only one study doing so.  
4 (Lo et al. 2013) stated that 296 (5.8%) of the 5109 people with diabetes in their study had type 1 diabetes. Two  
5 studies were conducted in Taiwan, two in the USA and the remaining four were conducted in China, South  
6 Korea, Israel and Australia.  
7

8 Overall QUIPS risk of bias scores for each study can be found in Table 1 and full QUIPS assessments  
9 can be found in Appendix Table B1. Overall, there was a 75% agreement between reviewers across the  
10 individual bias domains, and reviewers agreed on 4 of the 8 overall risk of bias scores. One of the cohort  
11 studies [25] was scored as being at a moderate risk of bias for their overall study rating and the other seven  
12 studies were rated as being at a high risk of bias overall. A bar graph of the scores for individual risk of bias  
13 domains can be found in Appendix Figure B1. Risk of bias was generally high across most domains, but  
14 especially so for the risk of unaccounted confounding, which was scored as being at a high risk of bias in all  
15 eight studies. Five of the case-control studies [18,20-23] only accounted for age, gender or a combination of  
16 the two. One study [19] matched on the time of hospitalisation and adjusted for history of minor shoulder  
17 trauma. One cohort study [24] adjusted for age, sex and dyslipidaemia; the other cohort study [25] adjusted  
18 for age, income, stroke, hypertension, hyperlipidaemia, obesity and chronic obstructive pulmonary disease.  
19  
20

21 Six case-control studies including a total of 5388 people were pooled in a random-effects meta-  
22 analysis, with a pooled odds ratio of 3.69 (95% CI: 2.99, 4.56) (Figure 2). The raw data extracted from each  
23 study that was used to calculate odds ratios can be found in Appendix Table C1. The estimated between-study  
24 variance was small ( $\tau^2 < 0.01$ , 95% CI:  $< 0.01$ , 0.23) and little heterogeneity was detected ( $Q = 2.07$ ,  $df = 5$ ,  $p = 0.84$ ;  
25  $I^2 < 0.01\%$  (95% CI:  $< 0.1\%$ , 67.6%)), but the estimate for  $I^2$  is imprecise as indicated by the wide 95% confidence  
26 interval. The influence analysis showed that excluding the largest study (K. Kingston et al. 2018), which  
27 contained 4380 of the 5388 participants, greatly reduces the precision of the pooled estimate but did not  
28 substantially affect the value of the pooled estimate (Figure 3). Further, excluding any other single study did  
29 not substantially affect the value of the pooled estimate (Figure 3). The two studies with the smallest standard  
30 errors for their effect estimates had the largest odds ratios, making the funnel plot appear unsymmetrical.  
31 However, due to the small number of studies contributing to the funnel plot, the asymmetrical appearance  
32 could be due to chance (Figure 4).  
33  
34

35 The two cohort studies that were identified used Cox proportional-hazards models and obtained  
36 results suggesting that people with diabetes were more at risk of developing frozen shoulder. One cohort  
37 study [24] using electronic health records from Taiwan, with a 3-year follow-up and consisting of 315,308  
38 people reported an age-, sex- and dyslipidaemia-adjusted hazard ratio of 1.32 (95% CI: 1.22, 1.42). Another  
39 cohort study [25], with an 8-year follow-up, consisting of 25,582 people, also using electronic health records  
40 from Taiwan, estimated an age-, income-, stroke-, hypertension-, hyperlipidaemia-, obesity- and chronic  
41 obstructive pulmonary disease- adjusted hazard ratio of 1.67 (95% CI: 1.46, 1.91).  
42  
43  
44

#### 45 **4 - Discussion**

46 This systematic review consists of eight studies each demonstrating evidence to suggest that diabetes is  
47 associated with the onset of frozen shoulder. Our meta-analysis of six case-control studies yielded a pooled  
48 odds ratio of 3.69 (95% CI: 2.99, 4.56), and the value of the pooled estimate was robust to the omission of any  
49 individual study. The odds ratio estimates of all but one study (Kingston et al. 2018) were imprecise with large  
50 confidence intervals; this meant that the confidence intervals overlapped well, resulting in a small  $I^2$  value. It is  
51 also important to note that Cochran's Q statistic should be interpreted with caution since the number of  
52 studies included in the analysis was small [26].  
53  
54

55 The funnel plot appeared to show a slight asymmetry. Given that a small number of studies were  
56 available, it is difficult to assess accurately whether any small-study bias was present or if the appearance was  
57 due to chance. However, since our influence analysis has shown that the inclusion/exclusion of any individual  
58 study had very little impact on the pooled effect estimate, any potential small-study bias would be unlikely to  
59 substantially affect the results.  
60

1  
2  
3 Two cohort studies were identified, both of which corroborate the evidence from the six case-control  
4 studies reported above, that people with diabetes are more likely to develop frozen shoulder than those  
5 without diabetes. Of the two cohort studies, one was deemed to be at a high risk of bias and the other at a  
6 moderate risk of bias. The hazard ratios in the two studies did differ, which could have partly been due to the  
7 differences in the covariates that were adjusted for and/or the differences in the duration of follow-up. Both  
8 studies were rated as being at a high of bias for the outcome-measurement domain as the length of follow-up  
9 (3 years [24] and 8 years [25]) was deemed too short to establish whether a patient would develop frozen  
10 shoulder in the future. Previous studies have suggested that the duration of diabetes may be associated with  
11 the risk of developing frozen shoulder [27,28], with one of the cohort studies in this review also stating that  
12 their study *"suggests that the development of [frozen shoulder] is associated with the duration of diabetes"*  
13 [24]. Therefore, future studies should ensure that the follow-up period is long enough to observe participants  
14 from diabetes diagnosis through to the ages for which frozen shoulder is common. A cross-sectional study of  
15 1,373 patients presenting with frozen shoulder estimated that the mean age of onset for frozen shoulder was  
16 55.4 years with a standard deviation of 9.9 years [3].  
17  
18

19 Another important limitation of the studies included in this review was the overall poor adjustment  
20 for confounding variables. All eight studies were rated as being at a high risk of unaccounted confounding. In  
21 each study, confounders were either ignored [18,20-24] or inappropriate statistical methods, such as  
22 univariable prefiltering and stepwise selection, were used [19,24,25]. These methods are especially poorly  
23 suited for aetiologic models [29]. Thus, these studies may have missed potentially important confounders  
24 [19,24,25] or erroneously adjusted for mediators, such as stroke [25].  
25

26 Previously, a meta-analysis of cross-sectional studies established that frozen shoulder was more  
27 prevalent in people with diabetes than among people without diabetes. This systematic review provides  
28 evidence of a temporal relationship between diabetes and frozen shoulder. Understanding the temporal  
29 relationship is key to explaining why diabetes and frozen shoulder are associated, however further high-quality  
30 research with appropriate methods and study design is required to confirm the strength of the association and  
31 establish whether diabetes is indeed a cause of frozen shoulder.  
32

33 Whilst sound and reliable epidemiological evidence of a causal relationship between diabetes and  
34 frozen shoulder is currently unavailable, elsewhere in the literature, researchers have hypothesised about  
35 potential pathological mechanisms through which diabetes may lead to frozen shoulder. Current evidence,  
36 based on histological studies, suggests that a pathophysiological process consisting of chronic inflammation  
37 and capsular fibrosis leads to the contracture in frozen shoulder [30,31]. It has been hypothesised that the  
38 accumulation of advanced glycation end products (AGE's), which lead to the cross-linking of collagen [32,33],  
39 may explain the fibrosis in the capsule of frozen shoulder patients [34]. Glycation is a process by which simple  
40 sugars bond to proteins, which is enhanced by persistent hyperglycaemia. Thus, the role of glycation and AGE's  
41 in the fibrosis of the shoulder capsule could potentially be a reason why diabetes is associated with the onset  
42 of frozen shoulder. Another potential reason why diabetes may be associated with frozen shoulder is that  
43 hyperglycaemia may induce proinflammatory cytokines [35] which have been found to be elevated in the  
44 capsule and synovium of frozen shoulder patients [36].  
45  
46

47 The association between glycaemic control and the risk of developing frozen shoulder should also be  
48 a focus for future research. One study found evidence to suggest that poor long-term glycaemic control in  
49 people with diabetes is associated with an increased incidence of frozen shoulder [37], whilst another study  
50 found no association between HbA1c level in people with diabetes and the prevalence of frozen shoulder [38].  
51 Further research is required to investigate whether glycaemic control is associated with the onset of frozen  
52 shoulder.  
53

54 High quality epidemiological research is required to better understand the association between  
55 diabetes and frozen shoulder. Further research should clearly and transparently report the methods through  
56 which adjustment sets are selected whilst using a model-building strategy that is appropriate for the research  
57 question of interest. Additionally, there is a lack of prospective studies investigating the association between  
58 diabetes and the onset of frozen shoulder; we identified only two prospective studies in this review, both of  
59  
60

1  
2  
3 which were from Taiwan. Future studies with prospective designs will help to gauge whether the findings of  
4 these two cohort studies are reproducible, and whether the results are consistent across different populations.  
5  
6  
7

## 8 **5 - Conclusion**

9  
10 This systematic review provides evidence that people with diabetes are more at risk of developing frozen  
11 shoulder than those without diabetes. However, high-quality cohort studies with sufficiently long follow-up  
12 and appropriate adjustment for confounders are required to better understand the association of diabetes  
13 with the onset of frozen shoulder. Given the evidence in this review, clinicians should consider checking  
14 whether patients with diabetes are experiencing musculoskeletal pain at their routine follow-up  
15 appointments.  
16  
17

## 18 **6 - Acknowledgements**

19  
20 This study was supported by the Versus Arthritis PhD scholarship scheme [grant number 21899]. The author  
21 would also like to thank the information specialists of evidence synthesis team at the Primary Care Centre  
22 Versus Arthritis for their advice regarding the search strategy, and Elaine Willmore for taking time to check the  
23 results of our searches for this review. Further thanks are given to Dr Linda Chesterton, who was involved in  
24 the initial conceptualisation of this study. Claire Burton is funded by an NIHR (National Institute for Health  
25 Research) Clinical Lectureship. The views expressed are those of the authors and not necessarily those of the  
26 National Health Service, the NIHR, or the Department of Health and Social Care.  
27  
28  
29  
30  
31  
32

## 33 **Abbreviations**

34 QUIPS - Quality In Prognosis Studies

35  
36 CI – Confidence interval

37  
38 Q – Cochran’s Q statistic

39  
40 df – Degrees of freedom  
41  
42  
43  
44

## 45 **Ethics Approval**

46 No Ethics Committee or Institutional Board approval is required.  
47  
48  
49  
50  
51

## 52 **Author contributions**

53  
54 All authors contributed to the conception of the study and systematic review study selection. Data extraction  
55 and risk of bias assessment was performed by BPD, MB-B and TR-M. BPD performed the meta-analysis and  
56 narrative synthesis of the results and drafted the initial manuscript. All authors contributed to editing and  
57 approval of the final manuscript.  
58  
59  
60

## Funding

This work was supported by Versus Arthritis grant number 21899. Claire Burton is funded by an NIHR (National Institute for Health Research) Clinical Lectureship. The views expressed are those of the authors and not necessarily those of the National Health Service, the NIHR, or the Department of Health and Social Care.

## Data availability

Data have been included in Table 1 and Appendix Table C.1.

## Conflicts of interest statement

The authors have no conflicts of interest.

## Supplementary Material

Appendix A contains the search strategy for MEDLINE.

Appendix B contains full QUIPS risk of bias assessments for each primary study and a bar graph of QUIPS scores for each of the six bias domains.

Appendix C contains the raw data extracted from each primary study that was used to calculate the odds ratios included in the meta-analysis.

## References

- [1] Bunker T. Frozen Shoulder. *Orthopaedics and Trauma*. 2011; 25(1):11-8. <https://doi.org/10.1016/j.mporth.2011.01.007>
- [2] Dias R, Cutts S, Massoud S. Frozen shoulder. *BMJ*. 2005; 331:1453-6. <https://doi.org/10.1136/bmj.331.7530.1453>
- [3] Cho C-H, Koo TW, Cho N-S, Park K-J, Lee BG, Shin D, Choi S, Cho S-H, Kim M-S, Ko S-H, Kim C-H, Park J-Y, Yoo Y-S. Demographic and Clinical Characteristics of Primary Frozen Shoulder in a Korean Population. *Clin Shoulder Elbow*. 2015; 18(3):133-7. doi: 10.5397/cise.2015.18.3.133
- [4] Rizk TE, Pinals RS. Frozen shoulder. *Seminars in Arthritis and Rheumatism*. 1982; 11(4):440-52. doi: 10.1016/0049-0172(82)90030-0
- [5] Cucchi D, Marmotti A, De Giorgi S, Costa A, D'Apolito R, Conca M, Russo A, Saccomanno MF, de Girolamo L. Risk Factors for Shoulder Stiffness: Current Concept. *Joints*. 2017; 5(4):217-23. doi: 10.1055/s-0037-1608951
- [6] Zreik NH, Malik RA, Charalambos CP. Adhesive capsulitis of the shoulder and diabetes: a meta-analysis of prevalence. *MLTJ*. 2016; 6(1):26-34. doi: 10.11138/mltj/2016.6.1.026
- [7] Rothman KJ, Greenland S, Lash TL. *Modern Epidemiology*: 3rd ed. Lippincott Williams & Wilkins. 2013.

- 1  
2  
3 [8] Moher D, Liberati A, Tetzlaff J, Altman DG. Preferred reporting items for systematic reviews and meta-  
4 analyses: the PRISMA statement. *BMJ*. 2009; 339:b2535. doi: 10.1136/bmj.b2535  
5
- 6 [9] Hayden JA, van der Windt DA, Cartwright JL, Côté P, Bombardier C. Assessing bias in studies of prognostic  
7 factors. *Ann Intern Med*. 2019; 158(4):280–6. doi: 10.7326/0003-4819-158-4-201302190-00009  
8
- 9 [10] Veroniki AA, Jackson D, Viechtbauer W, Bender R, Bowden J, Knapp G, Kuss O, Higgins JPT, Langan D,  
10 Salanti G. Methods to estimate the between-study variance and its uncertainty in meta-analysis. *Res Synth*  
11 *Meth*. 2016; 7(1):55-79. doi: 10.1002/jrsm.1164  
12
- 13 [11] IntHout J, Ioannidis JPA, Borm GF. The Hartung-Knapp-Sidik-Jonkman method for random-effects meta-  
14 analysis is straightforward and considerably outperforms the standard Der-Simonian-Laird method. *BMC Med*  
15 *Res Methodol*. 2014; 14:25. <https://doi.org/10.1186/1471-2288-14-25>  
16
- 17 [12] Higgins JPT, Thompson SG, Deeks JJ, Altman DG. Measuring inconsistency in meta-analyses. *BMJ*. 2003;  
18 327:557-60. <https://doi.org/10.1136/bmj.327.7414.557>  
19
- 20 [13] Partlett C, Riley RD. Random effects meta-analysis: Coverage performance of 95% confidence and  
21 prediction intervals following REML estimation. *Statist. Med*. 2016; 36(2):301-17.  
22 <https://doi.org/10.1002/sim.7140>  
23
- 24 [14] Sterne JAC, Harbord RM. Funnel Plots in Meta-analysis. *Stata Journal*. 2004; 4(2):127-41.  
25 <https://doi.org/10.1177/1536867X0400400204>  
26
- 27 [15] Higgins JPT, Green S. Cochrane Handbook for Systematic Reviews of Interventions Version 5.1.0 [updated  
28 March 2011]. *The Cochrane Collaboration*. 2011.  
29
- 30 [16] Viechtbauer W, Cheung MWL. Outlier and influence diagnostics for meta-analysis. *Res Syn Meth*. 2010;  
31 1(2):112-25. doi: 10.1002/jrsm.11  
32
- 33 [17] StataCorp. 2019. *Stata Statistical Software: Release 16*. College Station, TX: StataCorp LLC.  
34
- 35 [18] Boyle-Walker KL, Gabard DL, Bietsch E, Masek-VanArsdale DM, Robinson BL. A profile of patients with  
36 adhesive capsulitis. *J Hand Ther*. 1997; 10(3):222-8. [https://doi.org/10.1016/S0894-1130\(97\)80025-7](https://doi.org/10.1016/S0894-1130(97)80025-7)  
37
- 38 [19] Li W, Lu N, Xu H, Wang H, Huang J. Case control study of risk factors for frozen shoulder in China. *Int J*  
39 *Rheum Dis*. 2014; 18(5):508-13. <https://doi.org/10.1111/1756-185X.12246>  
40
- 41 [20] Lee S-Y, Park J, Song S-W. Correlation of MR Arthrographic Findings and Range of Shoulder Motions in  
42 Patients With Frozen Shoulder. *American Journal of Roentgenology*. 2012; 198(1):173-9. doi:  
43 10.2214/AJR.10.6173  
44
- 45 [21] Milgrom C, Novack V, Weil Y, Jaber S, Radeva-Petrova DR, Finestone A. Risk factors for idiopathic frozen  
46 shoulder. *Isr Med Assoc J*. 2008; 10(5):361-4. PMID: 18605360  
47
- 48 [22] Wang K, Ho V, Hunter-Smith DJ, Beh PS, Smith KM, Weber AB. Risk factors in idiopathic adhesive  
49 capsulitis: a case control study. *J Shoulder Elbow Surg*. 2013; 22(7):24-9. doi: 10.11138/mltj/2016.6.1.026  
50
- 51 [23] Kingston K, Curry EJ, Galvin JW, Li X. Shoulder adhesive capsulitis: epidemiology and predictors of surgery.  
52 *J Shoulder Elbow Surg*. 2018; 27(8):1437-43. doi: 10.1016/j.jse.2018.04.004  
53
- 54 [24] Huang Y-P, Fann C-Y, Chiu Y-H, Yen M-F, Chen L-S, Chen H-H, Pan S-L. Association of Diabetes Mellitus  
55 With the Risk of Developing Adhesive Capsulitis of the Shoulder: A Longitudinal Population-Based Follow up  
56 Study. *Arthritis Care & Research*. 2013; 65(7):1197-202. <https://doi.org/10.1002/acr.21938>  
57
- 58 [25] Lo S-F, Chu S-W, Muo C-H, Meng N-H, Chou L-W, Huang W-C, Huang C-M, Sung F-C. Diabetes mellitus and  
59 accompanying hyperlipidemia are independent risk factors for adhesive capsulitis: a nationwide population-  
60 based cohort study. *Rheumatology International*. 2014; 34:67-74. doi: 10.1007/s00296-013-2847-4

- 1  
2  
3 [26] Hardy RJ, Thompson SG. Detecting and describing heterogeneity in meta-analysis. *Stat Med*. 1998;  
4 17(8):841-56. doi: 10.1002/(sici)1097-0258(19980430)17:8<841::aid-sim781>3.0.co;2-d  
5  
6 [27] Thomas SJ, McDougall C, Brown IDM, Jaber M-C, Stearns A, Ashraf R, Fisher M, Kelly IG. Prevalence of  
7 symptoms and signs of shoulder problems in people with diabetes mellitus. *J Shoulder and Elbow Surg*. 16(6);  
8 748-51. doi: 10.1016/j.jse.2007.02.133  
9  
10 [28] Bridgeman JF, Periarthritis of the shoulder and diabetes mellitus. *Ann Rheum Dis*. 31: 69-71; 1972. doi:  
11 10.1136/ard.31.1.69  
12  
13 [29] Heinze G, Dunkler D. Five myths about variable selection. *Transplant International*. 2017; 30(1):6-10.  
14 <https://doi.org/10.1111/tri.12895>  
15  
16 [30] Wong PL, Tan HC. A Review on Frozen Shoulder. *Singapore Med J*. 2010; 51(9):694-7. PMID: 20938608  
17  
18 [31] Cho C-H, Song K-S, Kim B-S, Kim D.H, Lho Y-M. Biological Aspect of Pathophysiology for Frozen Shoulder.  
19 *BioMed Research International*. 2018; Article ID 7274517. <https://doi.org/10.1155/2018/7274517>  
20  
21 [32] Hwang KR, Murrell GAC, Millar NL, Bonar F, Lam R, Walton JR. Advanced glycation end products in  
22 idiopathic frozen shoulders. *J Shoulder and Elbow Surg*. 2016; 25(6): 981-8. doi: 10.1016/j.jse.2015.10.015  
23  
24 [33] Goldin A, Beckman JA, Schmidt AM, Creager MA. Advanced Glycation End Products. *Circulation*. 2006;  
25 114(6): 597-605. doi: 10.1161/CIRCULATIONAHA.106.621854.  
26  
27 [34] Hsu C-L, Sheu WH-H. Diabetes and shoulder disorders. *J Diabetes Investig*. 2016; 7(5):649-51.  
28 <https://doi.org/10.1111/jdi.12491>  
29  
30 [35] Shanmugam N, Reddy MA, Guha M, Natarajan R. High glucose-induced expression of proinflammatory  
31 cytokine and chemokine genes in monocytic cells. *Diabetes*. 2003; 52(5):1256-64. doi:  
32 10.2337/diabetes.52.5.1256  
33  
34 [36] Lho Y-M, Ha E, Cho C-H, Song K-S, Min B-W, Bae K-C, Lee K-J, Hwang I, Park H-B. Inflammatory cytokines  
35 are overexpressed in the subacromial bursa of frozen shoulder. *J Shoulder and Elbow Surg*. 2013; 22(5): 666-  
36 72. <https://doi.org/10.1016/j.jse.2012.06.014>  
37  
38 [37] Chan JH, Ho BS, Alvi HM, Saltzman MD, Marra G. The relationship between the incidence of adhesive  
39 capsulitis and hemoglobin A1c. *J Shoulder and Elbow Surg*. 2017; 26(10):1834-7.  
40 <https://doi.org/10.1016/j.jse.2017.03.015>  
41  
42 [38] Yian EH, Contreras R, Sodl JF. Effects of Glycemic Control on Prevalence of Diabetic Frozen Shoulder. *J*  
43 *Bone Joint Surg*. 2012; 94(10):919-23. doi: 10.2106/JBJS.J.01930  
44  
45  
46  
47

## Figure Captions

48  
49 **Fig. 1** PRISMA flow diagram summarising record identification and study selection.

50  
51  
52 **Fig. 2** Random effects meta-analysis of the association between diabetes and the odds of developing frozen  
53 shoulder.

54  
55  
56  
57 **Fig. 3** Influence plot showing the result of repeating the original meta-analysis (Figure 2), each time with a  
58 different primary study removed.  
59  
60

1  
2  
3  
4  
5  
6  
7  
8  
9  
10  
11  
12  
13  
14  
15  
16  
17  
18  
19  
20  
21  
22  
23  
24  
25  
26  
27  
28  
29  
30  
31  
32  
33  
34  
35  
36  
37  
38  
39  
40  
41  
42  
43  
44  
45  
46  
47  
48  
49  
50  
51  
52  
53  
54  
55  
56  
57  
58  
59  
60

**Fig. 4** Funnel plot of log odds ratios for developing frozen shoulder in people with diabetes vs. those without diabetes.

For peer review only

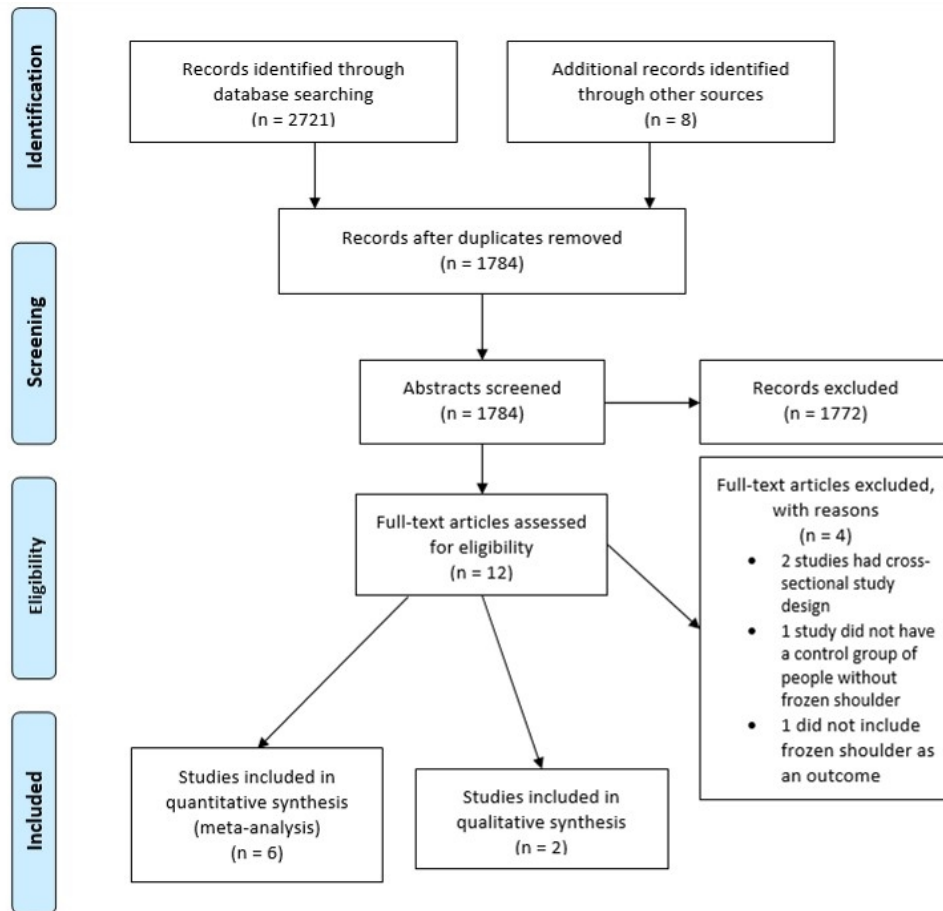

PRISMA flow diagram summarising record identification and study selection.

132x124mm (144 x 144 DPI)



1  
2  
3  
4  
5  
6  
7  
8  
9  
10  
11  
12  
13  
14  
15  
16  
17  
18  
19  
20  
21  
22  
23  
24  
25  
26  
27  
28  
29  
30  
31  
32  
33  
34  
35  
36  
37  
38  
39  
40  
41  
42  
43  
44  
45  
46  
47  
48  
49  
50  
51  
52  
53  
54  
55  
56  
57  
58  
59  
60

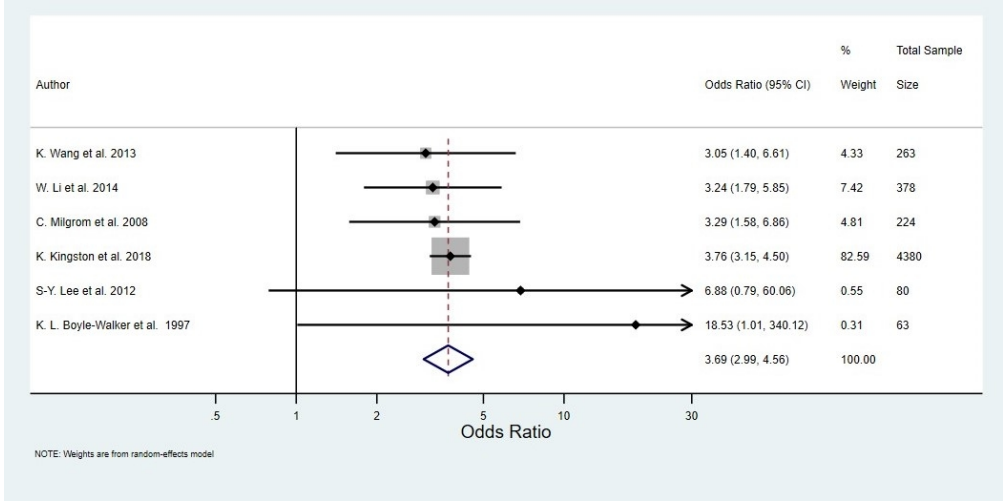

Random effects meta-analysis of the association between diabetes and the odds of developing frozen shoulder.

277x138mm (96 x 96 DPI)

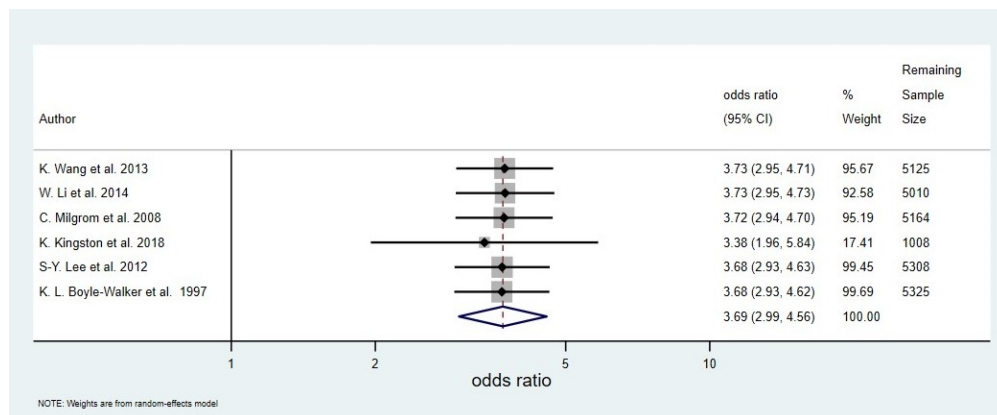

Influence plot showing the result of repeating the original meta-analysis (Figure 2), each time with a different primary study removed.

275x113mm (96 x 96 DPI)

1  
2  
3  
4  
5  
6  
7  
8  
9  
10  
11  
12  
13  
14  
15  
16  
17  
18  
19  
20  
21  
22  
23  
24  
25  
26  
27  
28  
29  
30  
31  
32  
33  
34  
35  
36  
37  
38  
39  
40  
41  
42  
43  
44  
45  
46  
47  
48  
49  
50  
51  
52  
53  
54  
55  
56  
57  
58  
59  
60

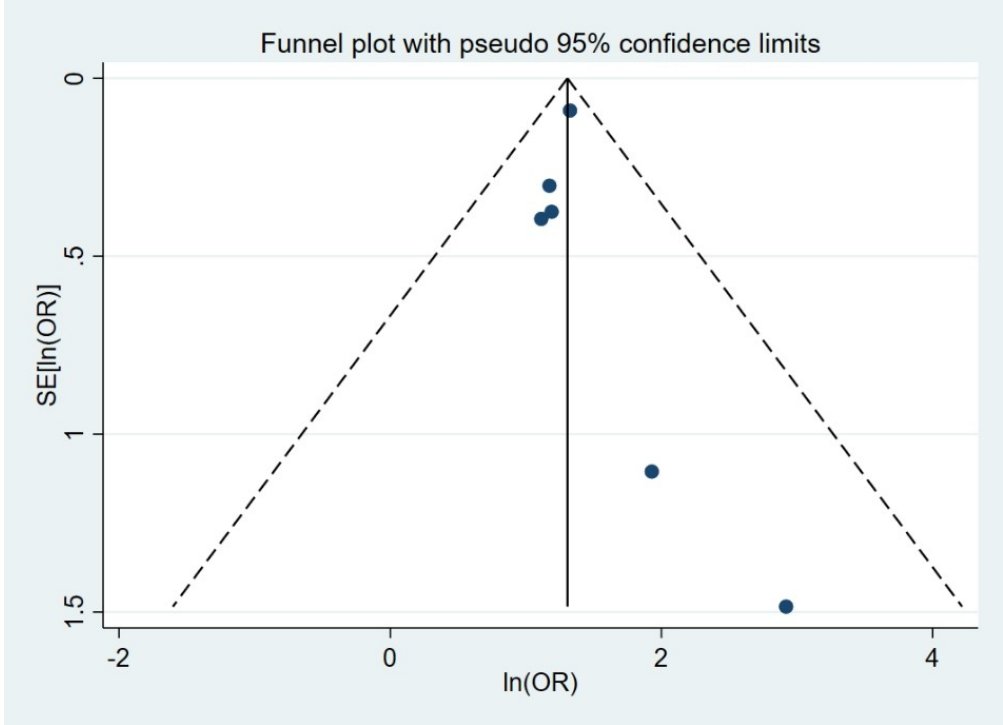

Funnel plot of log odds ratios for developing frozen shoulder in people with diabetes vs. those without diabetes.

109x79mm (220 x 220 DPI)

## Appendix A

Interface: OVID. Updated systematic review search conducted on June 2021.

1. ((shoulder\* or glenohumer\* or subacromi\* or acromi\* or rotator cuff) adj3 (instability or bursitis or frozen or impinge\* or tendonitis or tendinitis or pain\* or osteoarthr\* or periarthriti\* or peri arthriti\* or arthralgia)).ti,ab,kw.
2. Shoulder Impingement Syndrome/
3. exp Bursitis/
4. Rotator Cuff/
5. adhesive capsuliti\*.ti,ab,kw.
6. Shoulder Pain/
7. or/1-6
8. exp Pain/
9. pain\*.ti,ab,kw.
10. Arthralgia/
11. arthralgia.ti,ab,kw.
12. or/8-11
13. Shoulder/
14. Shoulder joint/
15. Acromioclavicular Joint/
16. (shoulder\* or glenohumer\* or subacromi\* or acromi\* or rotator cuff).ti,ab,kw.
17. or/13-16
18. 12 and 17
19. 7 or 18
20. exp Diabetes Mellitus/
21. diabet\*.ti,ab,kw.
22. (DMi or DM i).ti,ab,kw.
23. (DM1 or DM 1).ti,ab,kw.
24. (DM2 or DM 2).ti,ab,kw.
25. (DMii or DM ii).ti,ab,kw.
26. (DM adj2 type).ti,ab,kw.
27. or/20-26
28. 19 and 27
29. exp animals/ not humans/
30. 28 not 29

## Appendix B

| Table B.1 QUIPS domain scores for each primary study |               |                 |                         |                     |             |                                       |                      |
|------------------------------------------------------|---------------|-----------------|-------------------------|---------------------|-------------|---------------------------------------|----------------------|
| Source                                               | Participation | Study Attrition | Risk Factor Measurement | Outcome Measurement | Confounding | Statistical Analysis and Presentation | Overall Risk of Bias |
| <b>Case-Control Studies</b>                          |               |                 |                         |                     |             |                                       |                      |
| K. L. Boyle-Walker, et al., 1997 [18]                | High          | Moderate        | High                    | Moderate            | High        | Moderate                              | High                 |
| W. Li, et al., 2014 [19]                             | Moderate      | Low             | Moderate                | High                | High        | High                                  | High                 |
| S-Y. Lee, et al., 2012 [20]                          | Moderate      | Low             | Moderate                | Moderate            | High        | Moderate                              | High                 |
| C. Milgrom, et al., 2008 [21]                        | Moderate      | Low             | Low                     | Low                 | High        | Low                                   | High                 |
| K. Wang, et al., 2013 [22]                           | Low           | Low             | Low                     | Low                 | High        | Low                                   | High                 |
| K. Kingston, et al., 2018 [23]                       | Low           | Moderate        | Moderate                | Low                 | High        | Moderate                              | High                 |
| <b>Cohort studies</b>                                |               |                 |                         |                     |             |                                       |                      |
| Y-P. Huang, et al., 2013 [24]                        | Low           | Moderate        | Low                     | High                | High        | High                                  | High                 |
| S-F. Lo, et al., 2013 [25]                           | Low           | Low             | Low                     | Moderate            | High        | Low                                   | Moderate             |

**Fig. B.1** Bar graph of QUIPS scores for each of the six bias domains: study participation, study attrition, diabetes/risk factor (RF) measurement, frozen shoulder/outcome measurement, study confounding, statistical analysis and reporting.

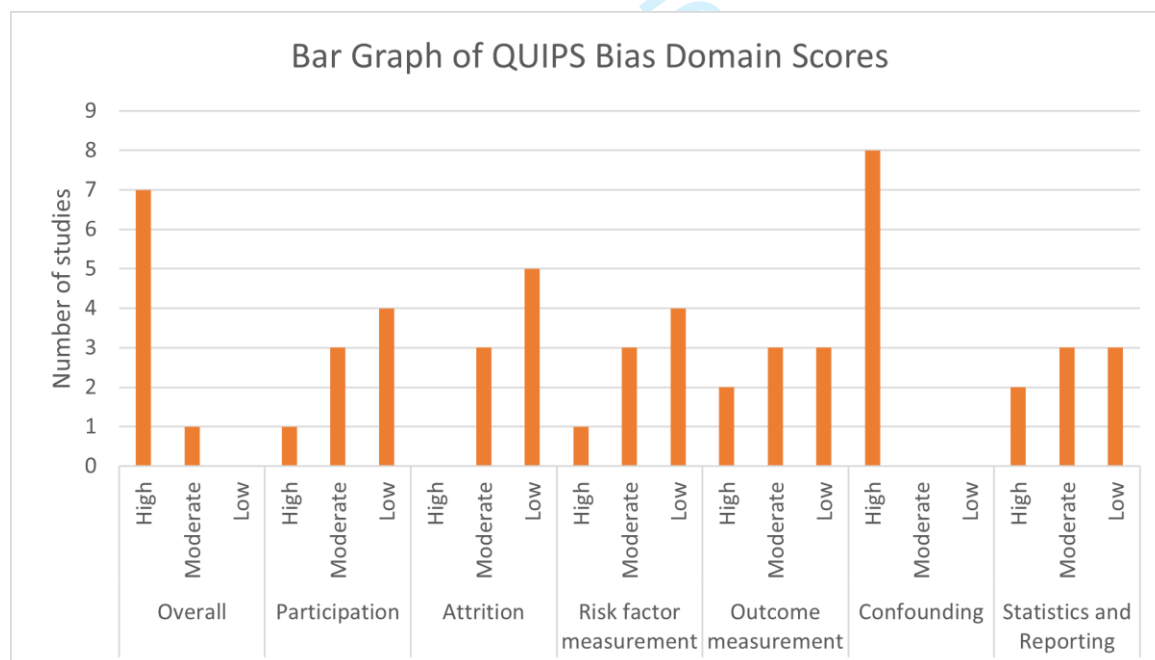

## Appendix C

| Table C.1 Raw data from each study.   |                                |                    |                                                               |                                                                  |
|---------------------------------------|--------------------------------|--------------------|---------------------------------------------------------------|------------------------------------------------------------------|
| Case-Control Studies                  |                                |                    |                                                               |                                                                  |
| Source                                | Number of cases                | Number of controls | Number of cases with diabetes                                 | Number of controls with diabetes                                 |
| K. L. Boyle-Walker, et al., 1997 [18] | 32                             | 31                 | 7                                                             | 0                                                                |
| W. Li, et al., 2014 [19]              | 182                            | 196                | 44                                                            | 18                                                               |
| S-Y. Lee, et al., 2012 [20]           | 40                             | 40                 | 6                                                             | 1                                                                |
| C. Milgrom, et al., 2008 [21]         | 126                            | 98                 | 37                                                            | 11                                                               |
| K. Wang, et al., 2013 [22]            | 87                             | 176                | 17                                                            | 13                                                               |
| K. Kingston, et al., 2018 [23]        | 2190                           | 2190               | 572                                                           | 188                                                              |
| Cohort studies                        |                                |                    |                                                               |                                                                  |
| Source                                | Number of people with diabetes | Number of controls | Number of people with diabetes that developed frozen shoulder | Number of people without diabetes that developed frozen shoulder |
| Y-P. Huang, et al., 2013 [24]         | 78827                          | 236481             | 946                                                           | 2254                                                             |
| S-F. Lo, et al., 2013 [25]            | 5109                           | 20473              | 553                                                           | 768                                                              |

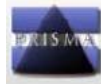

# PRISMA 2009 Checklist

| Section/topic                      | #  | Checklist item                                                                                                                                                                                                                                                                                              | Reported on page # |
|------------------------------------|----|-------------------------------------------------------------------------------------------------------------------------------------------------------------------------------------------------------------------------------------------------------------------------------------------------------------|--------------------|
| <b>TITLE</b>                       |    |                                                                                                                                                                                                                                                                                                             |                    |
| Title                              | 1  | Identify the report as a systematic review, meta-analysis, or both.                                                                                                                                                                                                                                         | 1                  |
| <b>ABSTRACT</b>                    |    |                                                                                                                                                                                                                                                                                                             |                    |
| Structured summary                 | 2  | Provide a structured summary including, as applicable: background; objectives; data sources; study eligibility criteria, participants, and interventions; study appraisal and synthesis methods; results; limitations; conclusions and implications of key findings; systematic review registration number. | 1                  |
| <b>INTRODUCTION</b>                |    |                                                                                                                                                                                                                                                                                                             |                    |
| Rationale                          | 3  | Describe the rationale for the review in the context of what is already known.                                                                                                                                                                                                                              | 1                  |
| Objectives                         | 4  | Provide an explicit statement of questions being addressed with reference to participants, interventions, comparisons, outcomes, and study design (PICOS).                                                                                                                                                  | 2                  |
| <b>METHODS</b>                     |    |                                                                                                                                                                                                                                                                                                             |                    |
| Protocol and registration          | 5  | Indicate if a review protocol exists, if and where it can be accessed (e.g., Web address), and, if available, provide registration information including registration number.                                                                                                                               | 2                  |
| Eligibility criteria               | 6  | Specify study characteristics (e.g., PICOS, length of follow-up) and report characteristics (e.g., years considered, language, publication status) used as criteria for eligibility, giving rationale.                                                                                                      | 2                  |
| Information sources                | 7  | Describe all information sources (e.g., databases with dates of coverage, contact with study authors to identify additional studies) in the search and date last searched.                                                                                                                                  | 2                  |
| Search                             | 8  | Present full electronic search strategy for at least one database, including any limits used, such that it could be repeated.                                                                                                                                                                               | Appendix A         |
| Study selection                    | 9  | State the process for selecting studies (i.e., screening, eligibility, included in systematic review, and, if applicable, included in the meta-analysis).                                                                                                                                                   | 2                  |
| Data collection process            | 10 | Describe method of data extraction from reports (e.g., piloted forms, independently, in duplicate) and any processes for obtaining and confirming data from investigators.                                                                                                                                  | 2                  |
| Data items                         | 11 | List and define all variables for which data were sought (e.g., PICOS, funding sources) and any assumptions and simplifications made.                                                                                                                                                                       | 2                  |
| Risk of bias in individual studies | 12 | Describe methods used for assessing risk of bias of individual studies (including specification of whether this was done at the study or outcome level), and how this information is to be used in any data synthesis.                                                                                      | 2                  |
| Summary measures                   | 13 | State the principal summary measures (e.g., risk ratio, difference in means).                                                                                                                                                                                                                               | 2                  |
| Synthesis of results               | 14 | Describe the methods of handling data and combining results of studies, if done, including measures of consistency (e.g., I <sup>2</sup> ) for each meta-analysis.                                                                                                                                          | 3                  |

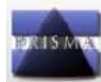

# PRISMA 2009 Checklist

Page 1 of 2

| Section/topic                 | #  | Checklist item                                                                                                                                                                                           | Reported on page # |
|-------------------------------|----|----------------------------------------------------------------------------------------------------------------------------------------------------------------------------------------------------------|--------------------|
| Risk of bias across studies   | 15 | Specify any assessment of risk of bias that may affect the cumulative evidence (e.g., publication bias, selective reporting within studies).                                                             | 2                  |
| Additional analyses           | 16 | Describe methods of additional analyses (e.g., sensitivity or subgroup analyses, meta-regression), if done, indicating which were pre-specified.                                                         | 3                  |
| <b>RESULTS</b>                |    |                                                                                                                                                                                                          |                    |
| Study selection               | 17 | Give numbers of studies screened, assessed for eligibility, and included in the review, with reasons for exclusions at each stage, ideally with a flow diagram.                                          | 3, Fig 1           |
| Study characteristics         | 18 | For each study, present characteristics for which data were extracted (e.g., study size, PICOS, follow-up period) and provide the citations.                                                             | Table 1            |
| Risk of bias within studies   | 19 | Present data on risk of bias of each study and, if available, any outcome level assessment (see item 12).                                                                                                | 6, Appendix C      |
| Results of individual studies | 20 | For all outcomes considered (benefits or harms), present, for each study: (a) simple summary data for each intervention group (b) effect estimates and confidence intervals, ideally with a forest plot. | 6, Fig 2           |
| Synthesis of results          | 21 | Present results of each meta-analysis done, including confidence intervals and measures of consistency.                                                                                                  | 6, Fig 2           |
| Risk of bias across studies   | 22 | Present results of any assessment of risk of bias across studies (see Item 15).                                                                                                                          | Appendix C         |
| Additional analysis           | 23 | Give results of additional analyses, if done (e.g., sensitivity or subgroup analyses, meta-regression [see Item 16]).                                                                                    | 6, Fig 3           |
| <b>DISCUSSION</b>             |    |                                                                                                                                                                                                          |                    |
| Summary of evidence           | 24 | Summarize the main findings including the strength of evidence for each main outcome; consider their relevance to key groups (e.g., healthcare providers, users, and policy makers).                     | 7                  |
| Limitations                   | 25 | Discuss limitations at study and outcome level (e.g., risk of bias), and at review-level (e.g., incomplete retrieval of identified research, reporting bias).                                            | 7                  |
| Conclusions                   | 26 | Provide a general interpretation of the results in the context of other evidence, and implications for future research.                                                                                  | 8                  |
| <b>FUNDING</b>                |    |                                                                                                                                                                                                          |                    |
| Funding                       | 27 | Describe sources of funding for the systematic review and other support (e.g., supply of data); role of funders for the systematic review.                                                               | 8                  |



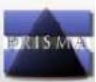

# PRISMA 2009 Checklist

1  
2  
3  
4  
5  
6  
7  
8  
9  
10  
11  
12  
13  
14  
15  
16  
17  
18  
19  
20  
21  
22  
23  
24  
25  
26  
27  
28  
29  
30  
31  
32  
33  
34  
35  
36  
37  
38  
39  
40  
41  
42  
43  
44  
45  
46  
47

For more information, visit: [www.prisma-statement.org](http://www.prisma-statement.org).

Page 2 of 2

For peer review only

# BMJ Open

## Diabetes as a Risk Factor for the Onset of Frozen Shoulder: A Systematic Review and Meta-Analysis

|                                 |                                                                                                                                                                                                                                                                                                                                                                                                                                                                                             |
|---------------------------------|---------------------------------------------------------------------------------------------------------------------------------------------------------------------------------------------------------------------------------------------------------------------------------------------------------------------------------------------------------------------------------------------------------------------------------------------------------------------------------------------|
| Journal:                        | <i>BMJ Open</i>                                                                                                                                                                                                                                                                                                                                                                                                                                                                             |
| Manuscript ID                   | bmjopen-2022-062377.R1                                                                                                                                                                                                                                                                                                                                                                                                                                                                      |
| Article Type:                   | Original research                                                                                                                                                                                                                                                                                                                                                                                                                                                                           |
| Date Submitted by the Author:   | 26-Sep-2022                                                                                                                                                                                                                                                                                                                                                                                                                                                                                 |
| Complete List of Authors:       | Dyer, Brett; Keele University, Primary Care Centre Versus Arthritis, School of Medicine<br>Rathod, Trishna; Keele University, Primary Care Centre Versus Arthritis, School of Medicine<br>Burton, Claire; Keele University, Primary Care Centre Versus Arthritis, School of Medicine<br>van der Windt, Danielle; Keele University, Primary Care Centre Versus Arthritis, School of Medicine<br>Bucknall, Milica; Keele University, Primary Care Centre Versus Arthritis, School of Medicine |
| <b>Primary Subject Heading</b>: | Rheumatology                                                                                                                                                                                                                                                                                                                                                                                                                                                                                |
| Secondary Subject Heading:      | Diabetes and endocrinology, Epidemiology                                                                                                                                                                                                                                                                                                                                                                                                                                                    |
| Keywords:                       | DIABETES & ENDOCRINOLOGY, EPIDEMIOLOGY, PRIMARY CARE, RHEUMATOLOGY                                                                                                                                                                                                                                                                                                                                                                                                                          |
|                                 |                                                                                                                                                                                                                                                                                                                                                                                                                                                                                             |

SCHOLARONE™  
Manuscripts



I, the Submitting Author has the right to grant and does grant on behalf of all authors of the Work (as defined in the below author licence), an exclusive licence and/or a non-exclusive licence for contributions from authors who are: i) UK Crown employees; ii) where BMJ has agreed a CC-BY licence shall apply, and/or iii) in accordance with the terms applicable for US Federal Government officers or employees acting as part of their official duties; on a worldwide, perpetual, irrevocable, royalty-free basis to BMJ Publishing Group Ltd ("BMJ") its licensees and where the relevant Journal is co-owned by BMJ to the co-owners of the Journal, to publish the Work in this journal and any other BMJ products and to exploit all rights, as set out in our [licence](#).

The Submitting Author accepts and understands that any supply made under these terms is made by BMJ to the Submitting Author unless you are acting as an employee on behalf of your employer or a postgraduate student of an affiliated institution which is paying any applicable article publishing charge ("APC") for Open Access articles. Where the Submitting Author wishes to make the Work available on an Open Access basis (and intends to pay the relevant APC), the terms of reuse of such Open Access shall be governed by a Creative Commons licence – details of these licences and which [Creative Commons](#) licence will apply to this Work are set out in our licence referred to above.

Other than as permitted in any relevant BMJ Author's Self Archiving Policies, I confirm this Work has not been accepted for publication elsewhere, is not being considered for publication elsewhere and does not duplicate material already published. I confirm all authors consent to publication of this Work and authorise the granting of this licence.

## Title Page

**Authors:** Brett P Dyer, Trishna Rathod-Mistry, Claire Burton, Danielle A van der Windt, Miliča Blagojevic-Bucknall.

**Title:** Diabetes as a Risk Factor for the Onset of Frozen Shoulder: A Systematic Review and Meta-Analysis.

**Affiliation:** Primary Care Centre Versus Arthritis, School of Medicine, Keele University, Staffordshire, UK

**Corresponding Author:** Brett P Dyer. **Email:** [b.p.dyer@keele.ac.uk](mailto:b.p.dyer@keele.ac.uk)

**ORCID ID's:** Brett P Dyer: 0000-0001-8039-7631, Trishna Rathod-Mistry: 0000-0002-6369-4746, Claire Burton 0000-0003-4688-3075, Danielle A van der Windt: 0000-0002-7248-6703, Miliča Blagojevic-Bucknall: 0000-0001-7230-7771.

**Word count:** 3191 words.

## Title

Diabetes as a Risk Factor for the Onset of Frozen Shoulder: A Systematic Review and Meta-Analysis

## Abstract

**Objective** Summarise longitudinal observational studies to determine whether diabetes (types 1 and 2) is a risk factor for frozen shoulder.

**Methods** Studies were identified through a systematic literature search of eleven bibliographic databases (MEDLINE, EMBASE, AMED, PsycINFO, Web of Science core collection, CINAHL, Epistemonikos, Trip, PEDro, OpenGrey, and The Grey Literature Report; searched on January 2019, and updated in June 2021), reference screening and emailing professional contacts. Longitudinal observational studies that estimated the association between diabetes and developing frozen shoulder were eligible. Risk of bias was judged using the Quality In Prognosis Studies tool. For studies providing sufficient data, random-effects meta-analysis was used to derive summary estimates of the association between diabetes and the onset of frozen shoulder.

**Results** A meta-analysis of six case-control studies including 5388 people estimated the odds of developing frozen shoulder for people with diabetes to be 3.69 (95% CI: 2.99, 4.56) times the odds for people without diabetes. Two cohort studies were identified, both suggesting diabetes was associated with frozen shoulder, with hazard ratios of 1.32 (95% CI: 1.22, 1.42) and 1.67 (95% CI: 1.46, 1.91). Risk of bias was judged as high in seven studies and moderate in one study.

**Conclusions** People with diabetes are more likely to develop frozen shoulder. Risk of unmeasured confounding was the main limitation of this systematic review. High-quality studies are needed to confirm the strength of, and understand reasons for, the association.

**PROSPERO registration number** CRD42019122963.

**Funding** This work was supported by Versus Arthritis grant number 21899.

**Keywords:** Diabetes, Frozen shoulder, Adhesive capsulitis, Risk factor, Meta-analysis

## Strengths and limitations of this study

- This systematic review is the first to summarise the results of studies estimating the longitudinal association between diabetes and the onset of frozen shoulder.
- Robust meta-analytic methods were used to synthesise and analyse data.
- Sensitivity to influential estimates and sensitivity to small study bias were assessed.
- Risk of bias was judged to be high in seven studies and moderate in one study; this limits the certainty in evidence.
- Only two cohort studies were identified which meant that pooling of association estimates was not suitable.

## 1 - Introduction

Frozen shoulder, also known as adhesive capsulitis, is a painful and severely debilitating condition. The inflammatory contracture of the glenohumeral joint capsule in frozen shoulder restricts both active and passive range of motion, with loss of external rotation being especially characteristic of this condition [1].

Frozen shoulder generally presents between the ages of 50 and 60 years and rarely presents before 40 years [2]. Women (58%) are more likely to develop frozen shoulder than men (42%) [3]. The contralateral shoulder is also affected in 6% to 17% of patients [4]. Although the exact aetiology remains unclear, several factors have been found to be associated with frozen shoulder, including trauma [3], thyroid dysfunction [5-7], cardiovascular disease [2,8], metabolic factors [7,9-11], and other musculoskeletal conditions such as Dupuytren's contracture [12,13]. The most common comorbidity in people with frozen shoulder is diabetes [2], both type 1 and type 2 [6]. The prevalence of frozen shoulder in the general population is around 0.75% [1], but the prevalence of frozen shoulder in people with diabetes is much higher. A meta-analysis of 13 cross-sectional studies estimated the prevalence of frozen shoulder in populations with diabetes to be 13.4% (95% confidence interval (CI): 10.2%, 17.2%) [14].

Diabetes is a term used to describe a group of chronic diseases characterised by hyperglycaemia. The two most prevalent types of diabetes are type 1 and type 2, making up 8% and 90% of cases, respectively [15]. It is well-known that people with diabetes are at risk of complications such as cardiovascular disease, retinopathy, neuropathy, and nephropathy [16], although the musculoskeletal complications of diabetes are not as well-known [17]. Musculoskeletal conditions, such as frozen shoulder, can significantly affect the quality of a patient's life and should not be overlooked. Our previous systematic review and narrative synthesis of 28 studies has shown that patients with diabetes may experience worse outcomes from frozen shoulder than people without frozen shoulder [18].

It has been suggested that diabetes may be a cause of frozen shoulder through glycation processes and/or inflammatory processes leading to capsular fibrosis and subsequent contracture [7,19,20]. To understand whether diabetes could potentially be a cause of frozen shoulder it is necessary (although not sufficient) to have evidence of the temporal relationship between diabetes and frozen shoulder [21]. This systematic review aims to summarise evidence from longitudinal observational studies to understand the temporal relationship between diabetes and frozen shoulder.

## 2 - Methods

### 2.1 – Search Strategy

The protocol for this systematic review was registered on PROSPERO (CRD42019122963) and the review was conducted and reported using PRISMA guidelines [22]. A systematic literature search of MEDLINE, EMBASE, AMED, PsycINFO, Web of Science core collection, CINAHL, Epistemonikos, Trip, PEDro, OpenGrey, and The Grey Literature Report was carried out in January 2019 and updated in June 2021. Reference lists of eligible studies were screened. Additionally, a professional contact of one author (DAvdW) was contacted to identify further studies. We retrieved all epidemiological studies containing index terms (e.g. Medical Subject Headings) and free-text words related to diabetes and shoulder pain more generally (not limited to frozen shoulder) to reduce the risk of missing potentially relevant publications. The search strategy for MEDLINE, which was constructed with the support of a health information specialist, can be found in Appendix A.

### 2.2 – Study Selection

Reviewer BPD screened all titles and abstracts to check eligibility using the pre-defined inclusion and exclusion criteria, and reviewers MB-B and CB independently checked a 20% random sample. Reviewer BPD checked all full-texts for eligibility using the inclusion and exclusion criteria, and reviewers MB-B, CB, TR-M also

1  
2  
3 independently checked eligibility. Disagreements regarding the inclusion of studies were resolved through  
4 discussion with DAvdW.  
5

### 6 **2.3 – Inclusion Criteria**

7  
8 To be eligible for inclusion, studies were required to have a longitudinal, prospective or retrospective,  
9 observational study design. Cohort studies were required to have a study population consisting of people  
10 without frozen shoulder at inclusion and must have established whether diabetes was present at baseline (all  
11 types of diabetes were considered). Case-control studies were required to have a study population consisting  
12 of people with frozen shoulder and a control group without frozen shoulder, with diabetes defined as the  
13 exposure of interest. The paper must have presented an odds ratio, risk ratio or hazard ratio, or they must  
14 have presented sufficient data to allow the associations to be estimated. There were no restrictions to setting;  
15 population based as well as clinical cohorts were eligible. All non-English language papers were assessed by  
16 reviewers with appropriate language skills. Cross-sectional studies and case series were excluded. Studies were  
17 also excluded if a full text could not be obtained.  
18

### 19 **2.4 – Data Extraction and Risk of Bias**

20  
21 Data extraction was completed by reviewer BPD and was independently checked by reviewers MB-B and TR-  
22 M. Types of data extracted included details of study design, setting, sample characteristics,  
23 exposure/outcome/covariate measurement, inclusion and exclusion criteria, sample size, attrition, covariate  
24 conditioning, follow-up time, statistical analysis, association estimates (odds ratio, risk ratio or hazard ratio) or  
25 raw data to estimate association sizes if they were not already presented. Risk of bias was independently  
26 assessed by pairs of reviewers (BPD, MB-B, TR-M). Risk of bias was judged using the Quality In Prognosis  
27 Studies (QUIPS) tool [23]. The QUIPS tool covers six domains: (1) study participation, (2) study attrition, (3)  
28 prognostic/risk factor measurement, (4) outcome measurement, (5) study confounding, (6) statistical analysis  
29 and reporting. Each of the six domains is scored as being at a low, medium, or high risk of bias [23]. Domain  
30 scores were used to guide judgement of the overall risk of bias (scored as low, medium or high) for the study.  
31 Overall risk of bias was based on author judgement and the use of a tallied or summated score was avoided.  
32 All disagreements regarding data extraction and assessment of risk of bias were resolved by discussion.  
33  
34

### 35 **2.5 – Data Analysis**

36  
37 Case-control studies and cohort studies were analysed separately. Narrative synthesis was used where less  
38 than five studies were present and a random-effects meta-analysis model was used to estimate a summary  
39 estimate when five or more studies were present. Cohort study associations were measured using hazard  
40 ratios and case-control study associations were estimated using odds ratios. Where adjusted and crude  
41 estimates were both presented, the adjusted estimate was used. Where a zero-cell count was present within  
42 the results of a study, a continuity correction of 0.5 was added to all cells for that study. Restricted maximum  
43 likelihood estimation [24] was used to estimate the between-study variance,  $\tau^2$ , and the Hartung-Knapp-Sidik-  
44 Jonkman variance correction method [25] was used in the estimation of the pooled effect confidence interval.  
45 Heterogeneity was assessed using Cochran's Q statistic, complemented by the  $I^2$  index [26]. Prediction  
46 intervals were not estimated since they are inaccurate when there is little heterogeneity ( $I^2 < 0.3$ ), or an  
47 imbalance in study sizes exists, both of which were found in the meta-analysis in this review (see Section 3)  
48 [27]. A forest plot was used to visualise results of individual results and of the pooled estimate. Evidence of  
49 small-study bias was assessed with a funnel plot of log odds ratios against their standard errors [28]. A test for  
50 funnel plot asymmetry was not used since the meta-analysis included less than ten studies [29]. The influence  
51 of each study on the overall pooled estimate was assessed by repeating the meta-analysis, each time leaving  
52 out a single study [30]. Statistical analysis was carried out using Stata version 16.1 [31].  
53  
54

### 55 **2.6 - Patient and Public Involvement**

56 No patient involved.  
57  
58  
59  
60

### 3 - Results

The searches identified 1784 unique citations, 12 of which were selected for full-text screening, and eight studies consisting of a total of 346,278 people fulfilled the inclusion criteria (Figure 1). Table 1 summarises information on risk of bias, study design, setting, participants, sample size, and methods used for diagnosing diabetes and frozen shoulder. Of the eight studies that met the criteria for inclusion, six [32-37] had case-control designs and two [38,39] had cohort designs. Three studies [37-39] (including the two cohort studies)

**Table 1.** Characteristics of Studies on diabetes as a risk factor for frozen shoulder

| Source                                | Risk of Bias (QUIPS, overall assessment) | Design and Setting                                                      | % Female                                     | Mean Age (years)                    | Sample Size               | Method to diagnose diabetes and frozen shoulder                                                                                                          | Variables conditioned on                                                          |
|---------------------------------------|------------------------------------------|-------------------------------------------------------------------------|----------------------------------------------|-------------------------------------|---------------------------|----------------------------------------------------------------------------------------------------------------------------------------------------------|-----------------------------------------------------------------------------------|
| <b>Case-control studies</b>           |                                          |                                                                         |                                              |                                     |                           |                                                                                                                                                          |                                                                                   |
| K. L. Boyle-Walker, et al., 1997 [32] | High                                     | Sex-Matched Case-Control at Physical Therapy Clinic in the USA          | Case Group: 75%, Control Group: 68%          | Not reported                        | Cases: 32, Controls: 31   | Diabetes: Self-reported Questionnaire<br>Frozen shoulder: Clinically diagnosed                                                                           | Sex-matched                                                                       |
| W. Li, et al., 2014 [33]              | High                                     | Hospital based case-control matched on time of hospitalisation in China | Case Group: 63%, Control Group: 55%          | Cases: 57.2, Controls: 45.9         | Cases: 182, Controls: 196 | Diabetes: Face-to-face interview<br>Frozen shoulder: Clinically diagnosed                                                                                | Matched on time of hospitalisation, adjusted for history of minor shoulder trauma |
| S-Y. Lee, et al., 2012 [34]           | High                                     | Hospital based age- and sex-matched case-control in South Korea         | Case Group: 55%, Control Group: not reported | Cases: 52.8, Controls: not reported | Cases: 40, Controls: 40   | Diabetes: Unclear<br>Frozen shoulder: Clinically diagnosed                                                                                               | Age- and sex-matched                                                              |
| C. Milgrom, et al., 2008 [35]         | High                                     | Hospital based age-matched case-control in Israel                       | Case Group: 60%, Control Group: 65%          | Cases: 54.9, Controls: 55.4         | Cases: 126, Controls: 98  | Diabetes: If patient was receiving drug treatment for Diabetes or whose serum glucose was higher than 200 mg/dl<br>Frozen shoulder: Clinically diagnosed | Age-matched                                                                       |

collected information from electronic health records, four studies [33-36] were hospital-based, and one study [32] was based in a physical therapy clinic. Among the case-control studies, the percentage of female cases ranged from 52% to 75% and the mean age for cases ranged from 52.8 years to 57.2 years.



|                                |          |                                                                                             |                                            |                                              |                                                   |                                                                  |                                                                                                                                        |
|--------------------------------|----------|---------------------------------------------------------------------------------------------|--------------------------------------------|----------------------------------------------|---------------------------------------------------|------------------------------------------------------------------|----------------------------------------------------------------------------------------------------------------------------------------|
| K. Wang, et al., 2013 [36]     | High     | Hospital based age- and sex-matched case-control in Australia                               | Case Group: 64%, Control Group: 58%        | Cases: 56, Controls: 55.3                    | Cases: 87, Controls: 176                          | Diabetes: Self-reported<br>Frozen shoulder: Clinically diagnosed | Age- and sex-matched                                                                                                                   |
| K. Kingston, et al., 2018 [37] | High     | Sex-matched case-control using electronic health records in the USA                         | Case Group: 58%, Control Group: 58%        | Cases: 56.4, Controls: Not Reported          | Cases: 2190, Controls: 2190                       | Diabetes: ICD-9 Code<br>Frozen shoulder: ICD-9 Code              | Sex-matched                                                                                                                            |
| <b>Cohort studies</b>          |          |                                                                                             |                                            |                                              |                                                   |                                                                  |                                                                                                                                        |
| Y-P. Huang, et al., 2013 [38]  | High     | Age- and sex-matched cohort with 3-year follow-up using electronic health records in Taiwan | Exposed Group: 47%, Non-Exposed Group: 47% | Exposed Group: 55.7, Non-Exposed Group: 55.5 | Exposed Group: 78,827, Non-Exposed Group: 236,481 | Diabetes: ICD-9 Code<br>Frozen shoulder: ICD-9 Code              | Age- and sex-matched. Multivariable analysis adjusted for age, sex, dyslipidaemia                                                      |
| S-F. Lo, et al., 2013 [39]     | Moderate | Cohort with 8-year follow-up using electronic health records in Taiwan                      | Exposed Group: 52%, Non-Exposed Group: 51% | Not reported                                 | Exposed Group: 5109, Non-Exposed Group: 20,473    | Diabetes: ICD-9 Code<br>Frozen shoulder: ICD-9 Code              | Multivariable analysis adjusted for age, income, stroke, hypertension, hyperlipidaemia, obesity, chronic obstructive pulmonary disease |

Presence of diabetes was identified using ICD-9 codes (codes to classify diseases, symptoms, clinical findings and causes of disease and injury) from electronic health records in three studies [37-39], self-reported in three studies [32,33,36], identified with a glucose test or if the patient was receiving drug treatment for diabetes in one study [35], and was unclear in one study [34]. Frozen shoulder was identified using [37-39] ICD-9 codes in three studies and was diagnosed clinically in five studies [32-36]. Only one study [39] reported the types of diabetes that the participants had. Lo et al. [39] stated that 296 (5.8%) of the 5109 people with diabetes in their study had type 1 diabetes. Two studies were conducted in Taiwan [38,39], two in the USA [32,37] and the remaining four were conducted in China [33], South Korea [34], Israel [35] and Australia [36].

Overall QUIPS risk of bias scores for each study can be found in Table 1 and full QUIPS assessments can be found in Table 2. Overall, there was a 75% agreement between reviewers across the individual bias domains, and reviewers agreed on 4 of the 8 overall risk of bias scores. One of the cohort studies [39] was scored as being at a moderate risk of bias for their overall study rating and the other seven studies were rated as being at a high risk of bias overall. A bar graph of the scores for individual risk of bias domains can be found in Appendix Figure B1. Risk of bias was generally high across most domains, but especially so for the risk of unaccounted confounding, which was scored as being at a high risk of bias in all eight studies. Five of the case-control studies [32,34-37] only accounted for age, gender or a combination of the two. One study [33] matched on the time of hospitalisation and adjusted for history of minor shoulder trauma. One cohort study [38] adjusted for age, sex and dyslipidaemia; the other cohort study [39] adjusted for age, income, stroke, hypertension, hyperlipidaemia, obesity and chronic obstructive pulmonary disease.

**Table 2** QUIPS domain scores for each primary study

| Source                                | Participation | Study Attrition | Risk Factor Measurement | Outcome Measurement | Confounding | Statistical Analysis and Presentation | Overall Risk of Bias |
|---------------------------------------|---------------|-----------------|-------------------------|---------------------|-------------|---------------------------------------|----------------------|
| <b>Case-Control Studies</b>           |               |                 |                         |                     |             |                                       |                      |
| K. L. Boyle-Walker, et al., 1997 [32] | High          | Moderate        | High                    | Moderate            | High        | Moderate                              | High                 |
| W. Li, et al., 2014 [33]              | Moderate      | Low             | Moderate                | High                | High        | High                                  | High                 |
| S-Y. Lee, et al., 2012 [34]           | Moderate      | Low             | Moderate                | Moderate            | High        | Moderate                              | High                 |
| C. Milgrom, et al., 2008 [35]         | Moderate      | Low             | Low                     | Low                 | High        | Low                                   | High                 |
| K. Wang, et al., 2013 [36]            | Low           | Low             | Low                     | Low                 | High        | Low                                   | High                 |
| K. Kingston, et al., 2018 [37]        | Low           | Moderate        | Moderate                | Low                 | High        | Moderate                              | High                 |
| <b>Cohort studies</b>                 |               |                 |                         |                     |             |                                       |                      |
| Y-P. Huang, et al., 2013 [38]         | Low           | Moderate        | Low                     | High                | High        | High                                  | High                 |
| S-F. Lo, et al., 2013 [39]            | Low           | Low             | Low                     | Moderate            | High        | Low                                   | Moderate             |

Six case-control studies including a total of 5388 people were pooled in a random-effects meta-analysis, with a pooled odds ratio of 3.69 (95% CI: 2.99, 4.56) (Figure 2). The raw data extracted from each study that was used to calculate odds ratios can be found in Appendix Table C1. The estimated between-study variance was small ( $\tau^2 < 0.01$ , 95% CI:  $< 0.01$ , 0.23) and little heterogeneity was detected ( $Q = 2.07$ ,  $df = 5$ ,  $p = 0.84$ ;  $I^2 < 0.01\%$  (95% CI:  $< 0.1\%$ , 67.6%)), but the estimate for  $I^2$  was imprecise as indicated by the wide 95% confidence interval. The influence analysis showed that excluding the largest study [37], which contained 4380 of the 5388 participants, greatly reduced the precision of the pooled estimate but did not substantially affect the value of the pooled estimate (Figure 3). Further, excluding any other single study did not substantially affect the value of the pooled estimate (Figure 3). The two studies with the smallest standard errors for their effect estimates had the largest odds ratio's, making the funnel plot appear unsymmetrical. However, due to the small number of studies contributing to the funnel plot, the asymmetrical appearance could be due to chance (Figure 4).

The two cohort studies that were identified used Cox proportional-hazards models and obtained results suggesting that people with diabetes were more at risk of developing frozen shoulder. One cohort study [38] using electronic health records from Taiwan, with a 3-year follow-up and consisting of 315,308 people reported an age-, sex- and dyslipidaemia-adjusted hazard ratio of 1.32 (95% CI: 1.22, 1.42). Another cohort study [39], with an 8-year follow-up, consisting of 25,582 people, also using electronic health records from Taiwan, estimated an age-, income-, stroke-, hypertension-, hyperlipidaemia-, obesity- and chronic obstructive pulmonary disease- adjusted hazard ratio of 1.67 (95% CI: 1.46, 1.91).

#### 4 - Discussion

This systematic review consists of eight studies each of which demonstrated evidence to suggest that diabetes is associated with the onset of frozen shoulder. Our meta-analysis of six case-control studies yielded a pooled odds ratio of 3.69 (95% CI: 2.99, 4.56), and the value of the pooled estimate was robust to the omission of any individual study. The odds ratio estimates of all but one study [37] were imprecise with large confidence intervals; this meant that the confidence intervals overlapped well, resulting in a small  $I^2$  value. It is also

1  
2  
3 important to note that Cochran's Q statistic should be interpreted with caution since the number of studies  
4 included in the analysis was small [40].  
5

6 The funnel plot was unsymmetrical. However, given that a small number of studies were available, it  
7 was difficult to assess accurately whether any small-study bias was present or if the appearance was due to  
8 chance. Since our influence analysis has shown that the inclusion/exclusion of any individual study had very  
9 little impact on the pooled effect estimate, any potential small-study bias would be unlikely to substantially  
10 affect the results.  
11

12 Two cohort studies were identified, both of which corroborate the evidence from the six case-control  
13 studies reported above, that people with diabetes are more likely to develop frozen shoulder than those  
14 without diabetes. Of the two cohort studies, one was deemed to be at a high risk of bias and the other at a  
15 moderate risk of bias. The hazard ratios in the two studies did differ, which could have partly been due to the  
16 differences in the covariates that were adjusted for and/or the differences in the duration of follow-up. Both  
17 studies were rated as being at a high of bias for the outcome-measurement domain as the length of follow-up  
18 (3 years [38] and 8 years [39]) was deemed too short to establish whether a patient would develop frozen  
19 shoulder in the future. Previous studies have suggested that the duration of diabetes may be associated with  
20 the risk of developing frozen shoulder [41,42], with one of the cohort studies in this review also stating that  
21 their study suggested that "the development of [frozen shoulder] is associated with the duration of diabetes"  
22 [38]. Therefore, future studies should ensure that the follow-up period is long enough to observe participants  
23 from diabetes diagnosis through to the ages for which frozen shoulder is common. A cross-sectional study of  
24 1,373 patients presenting with frozen shoulder estimated that the mean age of onset for frozen shoulder was  
25 55.4 years with a standard deviation of 9.9 years [3].  
26  
27

28 The two cohort studies in the review were both conducted using Electronic Health Records (EHRs).  
29 EHR datasets can provide large sample sizes with long follow-up periods and detailed patient medical record  
30 history [43]. Misdiagnosis and miscoding in EHRs are common limitations and could potentially result in a risk  
31 of bias for frozen shoulder measurement [44]. Research in the UK [45] and in the Netherlands [46] has shown  
32 that general practitioners often use non-specific shoulder pain codes instead of codes for specific shoulder  
33 conditions, e.g., frozen shoulder. This would lead to an underdiagnosis of frozen shoulder. Further, this  
34 misclassification may be differential since clinicians may feel more confident in providing a specific frozen  
35 shoulder diagnosis in patients with diabetes due to the pre-existing knowledge of the association between the  
36 two conditions. Conversely, it has also been noted that frozen shoulder is sometimes used as a "waste-bin  
37 diagnosis" for patients presenting with any stiff and painful shoulder [47]. Thus, EHR data may include other  
38 shoulder conditions with similar clinical presentations being coded as frozen shoulder.  
39  
40

41 Another important limitation was the overall poor adjustment for confounding variables. All eight  
42 studies were rated as being at a high risk of unaccounted confounding. In each study, confounders were either  
43 ignored [32,34-38] or inappropriate statistical methods, such as univariable prefiltering and stepwise selection,  
44 were used [33,38,39]. These methods are especially poorly suited for aetiologic models [48]. Thus, these  
45 studies may have missed potentially important confounders [33,38,39] or erroneously adjusted for mediators,  
46 such as stroke [39].  
47

48 The systematic review is also limited by there being only two cohort studies, meaning that pooling  
49 association estimates was not possible. Cohort studies are particularly useful for gaining a better  
50 understanding of temporal associations, as this review aimed to do. Further, both cohort studies were  
51 conducted in Taiwan using existing data from EHRs. Future studies with prospective designs will help to gauge  
52 whether the findings of these two cohort studies are reproducible, and whether the results are consistent  
53 across different populations.  
54

55 Previously, a meta-analysis of cross-sectional studies established that frozen shoulder was more  
56 prevalent in people with diabetes than among people without diabetes. This systematic review provides  
57 evidence of a temporal relationship between diabetes and frozen shoulder. Understanding the temporal  
58 relationship is key to explaining why diabetes and frozen shoulder are associated, however further high-quality  
59  
60

1  
2  
3 research with appropriate methods and study design is required to confirm the strength of the association and  
4 establish whether diabetes is indeed a cause of frozen shoulder.  
5

6 Whilst sound and reliable epidemiological evidence of a causal relationship between diabetes and  
7 frozen shoulder is currently unavailable, elsewhere in the literature, researchers have hypothesised about  
8 potential pathological mechanisms through which diabetes may lead to frozen shoulder. Current evidence,  
9 based on histological studies, suggests that a pathophysiological process consisting of chronic inflammation  
10 and capsular fibrosis leads to the contracture in frozen shoulder [49,50]. It has been hypothesised that the  
11 accumulation of advanced glycation end products (AGE's), which lead to the cross-linking of collagen [51,52],  
12 may explain the fibrosis in the capsule of frozen shoulder patients [33]. Glycation is a process by which simple  
13 sugars bond to proteins, which is enhanced by persistent hyperglycaemia. Thus, the role of glycation and AGEs  
14 in the fibrosis of the shoulder capsule could potentially be a reason why diabetes is associated with frozen  
15 shoulder. Another potential reason why diabetes may be associated with frozen shoulder is that  
16 hyperglycaemia may induce proinflammatory cytokines [53] which have been found to be elevated in the  
17 capsule and synovium of frozen shoulder patients [54].  
18  
19

20 The association between glycaemic control and the risk of developing frozen shoulder should also be  
21 a focus for future research. One study found evidence to suggest that poor long-term glycaemic control in  
22 people with diabetes is associated with an increased incidence of frozen shoulder [55], whilst another study  
23 found no association between HbA1c level in people with diabetes and the prevalence of frozen shoulder [56].  
24 Further research is required to investigate whether glycaemic control is associated with the development of  
25 frozen shoulder.  
26  
27  
28

## 29 **5 - Conclusion**

30 In summary, people with diabetes are more at risk of developing frozen shoulder than people without  
31 diabetes. However, existing research is limited by the high risk of unmeasured confounding. To better  
32 understand the nature of the relationship between diabetes and the onset of frozen shoulder, it is necessary  
33 to have high-quality cohort studies that use causal inference methods that are appropriate for aetiologic  
34 modelling. Given the existing evidence that has been summarised in this review, clinicians should consider  
35 checking whether patients with diabetes are experiencing shoulder pain at their routine follow-up  
36 appointments. An early diagnosis will help the clinician to provide treatment for the pain and lack of function  
37 that result from frozen shoulder.  
38  
39  
40  
41

## 42 **6 - Acknowledgements**

43 This study was supported by the Versus Arthritis PhD scholarship scheme [grant number 21899]. The author  
44 would also like to thank the information specialists of evidence synthesis team at the Primary Care Centre  
45 Versus Arthritis for their advice regarding the search strategy, and Elaine Willmore for taking time to check the  
46 results of our searches for this review. Further thanks are given to Dr Linda Chesterton, who was involved in  
47 the initial conceptualisation of this study. Claire Burton is funded by an NIHR (National Institute for Health  
48 Research) Clinical Lectureship. The views expressed are those of the authors and not necessarily those of the  
49 National Health Service, the NIHR, or the Department of Health and Social Care.  
50  
51  
52  
53

## 54 **Abbreviations**

55 QUIPS - Quality In Prognosis Studies

56 CI – Confidence interval

57 Q – Cochran's Q statistic  
58  
59  
60

1  
2  
3 df – Degrees of freedom  
4  
5  
6

### 7 **Ethics Approval**

8 No Ethics Committee or Institutional Board approval is required.  
9

10 No human participants included.  
11  
12  
13

### 14 **Author contributions**

15 All authors (BPD, CB, DvdW, MB-B and TR-M) contributed to the conception of the study and systematic  
16 review study selection. Data extraction and risk of bias assessment was performed by BPD, MB-B and TR-M.  
17 BPD performed the meta-analysis and narrative synthesis of the results and drafted the initial manuscript. All  
18 authors (BPD, CB, DvdW, MB-B and TR-M) contributed to editing and approval of the final manuscript.  
19  
20  
21  
22

### 23 **Funding**

24 This work was supported by Versus Arthritis grant number 21899. Claire Burton is funded by an NIHR (National  
25 Institute for Health Research) Clinical Lectureship. The views expressed are those of the authors and not  
26 necessarily those of the National Health Service, the NIHR, or the Department of Health and Social Care.  
27  
28  
29

### 30 **Data availability**

31 Data have been included in Table 1 and Appendix Table C.1.  
32  
33  
34

### 35 **Conflicts of interest statement**

36 The authors have no conflicts of interest.  
37  
38  
39  
40

### 41 **Supplementary Material**

42 Appendix A contains the search strategy for MEDLINE.  
43

44 Appendix B contains full QUIPS risk of bias assessments for each primary study and a bar graph of QUIPS scores  
45 for each of the six bias domains.  
46

47 Appendix C contains the raw data extracted from each primary study that was used to calculate the odds ratios  
48 included in the meta-analysis.  
49  
50

### 51 **References**

- 52  
53  
54 [1] Bunker T. Frozen Shoulder. *Orthopaedics and Trauma*. 2011; 25(1):11-8.  
55 <https://doi.org/10.1016/j.mporth.2011.01.007>  
56  
57 [2] Dias R, Cutts S, Massoud S. Frozen shoulder. *BMJ*. 2005; 331:1453-6.  
58 <https://doi.org/10.1136/bmj.331.7530.1453>  
59  
60

- 1  
2  
3 [3] Cho C-H, Koo TW, Cho N-S, Park K-J, Lee BG, Shin D, Choi S, Cho S-H, Kim M-S, Ko S-H, Kim C-H, Park J-Y, Yoo  
4 Y-S. Demographic and Clinical Characteristics of Primary Frozen Shoulder in a Korean Population. *Clin Shoulder*  
5 *Elbow*. 2015; 18(3):133-7. doi: 10.5397/cise.2015.18.3.133  
6  
7 [4] Rizk TE, Pinals RS. Frozen shoulder. *Seminars in Arthritis and Rheumatism*. 1982; 11(4):440-52. doi:  
8 10.1016/0049-0172(82)90030-0  
9  
10 [5] Cohen C, Tortato T, Silva OBS, Ferreira Leal M, Ejnisman B, Faloppa F. Association between frozen shoulder  
11 and thyroid diseases: strengthening the evidences. *Rev Bras Ortop*. 2020; 55(4):483–9. doi: 10.1055/s-0039-  
12 3402476  
13  
14 [6] Huang S-W, Lin J-W, Wang W-T, Wu C-W, Liou T-H, Lin H-W. Hyperthyroidism is a risk factor for developing  
15 adhesive capsulitis of the shoulder: a nationwide longitudinal population-based study. *Sci Rep*. 2014;  
16 25(4):4183. doi: 10.1038/srep04183  
17  
18 [7] Cucchi D, Marmotti A, De Giorgi S, Costa A, D’Apolito R, Conca M, Russo A, Saccomanno MF, de Girolamo L.  
19 Risk Factors for Shoulder Stiffness: Current Concept. *Joints*. 2017; 5(4):217-23. doi: 10.1055/s-0037-1608951  
20  
21 [8] Nagy MT, MacFarlane RJ, Khan Y, Waseem M. The frozen shoulder: myths and realities. *Open Orthop J*,  
22 2013; 7:352-355. doi: 10.2174/1874325001307010352  
23  
24 [9] Sung CM, Sung TS, Park HB. Are serum lipids involved in primary frozen shoulder? A case-control study. *J*  
25 *Bone Joint Surg*. 2014; 96(21):1828–33. doi: 10.2106/JBJS.M.00936  
26  
27 [10] Nayak SP, Panda CK. Is hyperlipidaemia a cause of primary frozen shoulder? A case-controlled study. *J*  
28 *Evid based med. healthc*. 2017; 4(13):697-710. doi 10.18410/jebmh/2017/135  
29  
30 [11] Austin D, Gans I, Park M, Carey J, Kelly J. The association of metabolic syndrome markers with adhesive  
31 capsulitis. *J Shoulder and Elbow Surg*. 2014; 23(7):1043-51. doi: 10.1016/j.jse.2013.11.004  
32  
33 [12] Smith SP, Devaraj VS, Bunker TD. The association between frozen shoulder and Dupuytren's disease. *J*  
34 *Shoulder Elbow Surg*. 2001; 10(2):149-51. doi: 10.1067/mse.2001.112883.  
35  
36 [13] Bunker TD, Anthony PP. The pathology of frozen shoulder. A Dupuytren-like disease. *J Bone Joint Surg Br*.  
37 1995; 77(5):677-83. PMID: 7559688.  
38  
39 [14] Zreik NH, Malik RA, Charalambos CP. Adhesive capsulitis of the shoulder and diabetes: a meta-analysis of  
40 prevalence. *MLTJ*. 2016; 6(1):26-34. doi: 10.11138/mltj/2016.6.1.026  
41  
42 [15] NHS Digital. *National Diabetes Audit 2017/18 - Report 1 Care Processes and Treatment Targets*. 2020.  
43 Accessed: 8th September 2022 [https://digital.nhs.uk/data-and-information/publications/statistical/national-](https://digital.nhs.uk/data-and-information/publications/statistical/national-diabetes-audit/report-1-care-processes-and-treatment-targets-2017-18-short-report)  
44 [diabetes-audit/report-1-care-processes-and-treatment-targets-2017-18-short-report](https://digital.nhs.uk/data-and-information/publications/statistical/national-diabetes-audit/report-1-care-processes-and-treatment-targets-2017-18-short-report)  
45  
46 [16] Fowler MJ. Microvascular and Macrovascular Complications of Diabetes. *Clin Diabetes*. 2008; 26(2):77–82.  
47 <https://doi.org/10.2337/diaclin.26.2.77>  
48  
49 [17] Sözen T, Başaran NC, Tınazlı M, Özişik L. Musculoskeletal problems in diabetes mellitus. *Eur J Rheumatol*,  
50 2018; 5(4):258–65. doi: 10.5152/eurjrheum.2018.18044  
51  
52 [18] Dyer BP, Burton C, Rathod-Mistry T, Blagojevic-Bucknall M, van der Windt DA. Diabetes as a prognostic  
53 factor in frozen shoulder: a systematic review. *Arch Rehabil Res Clin Transl*. 2021; 3:100141.  
54 <https://doi.org/10.1016/j.arrct.2021.100141>  
55  
56 [19] Hsu C-L, Sheu WH-H. Diabetes and shoulder disorders. *J Diabetes Investig*. 2016; 7(5):649-51.  
57 <https://doi.org/10.1111/jdi.12491>  
58  
59 [20] Pietrzak M, Adhesive capsulitis: An age-related symptom of metabolic syndrome and chronic low-grade  
60 inflammation? *Med Hypotheses*. 2016; 88:12-7. doi: 10.1016/j.mehy.2016.01.002.  
[21] Rothman KJ, Greenland S, Lash TL. *Modern Epidemiology*: 3rd ed. Lippincott Williams & Wilkins. 2013.

- 1  
2  
3 [22] Moher D, Liberati A, Tetzlaff J, Altman DG. Preferred reporting items for systematic reviews and meta-  
4 analyses: the PRISMA statement. *BMJ*. 2009; 339:b2535. doi: 10.1136/bmj.b2535  
5
- 6 [23] Hayden JA, van der Windt DA, Cartwright JL, Côté P, Bombardier C. Assessing bias in studies of prognostic  
7 factors. *Ann Intern Med*. 2019; 158(4):280–6. doi: 10.7326/0003-4819-158-4-201302190-00009  
8
- 9 [24] Veroniki AA, Jackson D, Viechtbauer W, Bender R, Bowden J, Knapp G, Kuss O, Higgins JPT, Langan D,  
10 Salanti G. Methods to estimate the between-study variance and its uncertainty in meta-analysis. *Res Synth*  
11 *Meth*. 2016; 7(1):55-79. doi: 10.1002/jrsm.1164  
12
- 13 [25] IntHout J, Ioannidis JPA, Borm GF. The Hartung-Knapp-Sidik-Jonkman method for random-effects meta-  
14 analysis is straightforward and considerably outperforms the standard Der-Simonian-Laird method. *BMC Med*  
15 *Res Methodol*. 2014; 14:25. <https://doi.org/10.1186/1471-2288-14-25>  
16
- 17 [26] Higgins JPT, Thompson SG, Deeks JJ, Altman DG. Measuring inconsistency in meta-analyses. *BMJ*. 2003;  
18 327:557-60. <https://doi.org/10.1136/bmj.327.7414.557>  
19
- 20 [27] Partlett C, Riley RD. Random effects meta-analysis: Coverage performance of 95% confidence and  
21 prediction intervals following REML estimation. *Statist. Med*. 2016; 36(2):301-17.  
22 <https://doi.org/10.1002/sim.7140>  
23
- 24 [28] Sterne JAC, Harbord RM. Funnel Plots in Meta-analysis. *Stata Journal*. 2004; 4(2):127-41.  
25 <https://doi.org/10.1177/1536867X0400400204>  
26
- 27 [29] Higgins JPT, Green S. Cochrane Handbook for Systematic Reviews of Interventions Version 5.1.0 [updated  
28 March 2011]. *The Cochrane Collaboration*. 2011.  
29
- 30 [30] Viechtbauer W, Cheung MWL. Outlier and influence diagnostics for meta-analysis. *Res Syn Meth*. 2010;  
31 1(2):112-25. doi: 10.1002/jrsm.11  
32
- 33 [31] StataCorp. 2019. *Stata Statistical Software: Release 16*. College Station, TX: StataCorp LLC.  
34
- 35 [32] Boyle-Walker KL, Gabard DL, Bietsch E, Masek-VanArsdale DM, Robinson BL. A profile of patients with  
36 adhesive capsulitis. *J Hand Ther*. 1997; 10(3):222-8. [https://doi.org/10.1016/S0894-1130\(97\)80025-7](https://doi.org/10.1016/S0894-1130(97)80025-7)  
37
- 38 [33] Li W, Lu N, Xu H, Wang H, Huang J. Case control study of risk factors for frozen shoulder in China. *Int J*  
39 *Rheum Dis*. 2014; 18(5):508-13. <https://doi.org/10.1111/1756-185X.12246>  
40
- 41 [34] Lee S-Y, Park J, Song S-W. Correlation of MR Arthrographic Findings and Range of Shoulder Motions in  
42 Patients With Frozen Shoulder. *American Journal of Roentgenology*. 2012; 198(1):173-9. doi:  
43 10.2214/AJR.10.6173  
44
- 45 [35] Milgrom C, Novack V, Weil Y, Jaber S, Radeva-Petrova DR, Finestone A. Risk factors for idiopathic frozen  
46 shoulder. *Isr Med Assoc J*. 2008; 10(5):361-4. PMID: 18605360  
47
- 48 [36] Wang K, Ho V, Hunter-Smith DJ, Beh PS, Smith KM, Weber AB. Risk factors in idiopathic adhesive  
49 capsulitis: a case control study. *J Shoulder Elbow Surg*. 2013; 22(7):24-9. doi: 10.11138/mltj/2016.6.1.026  
50
- 51 [37] Kingston K, Curry EJ, Galvin JW, Li X. Shoulder adhesive capsulitis: epidemiology and predictors of surgery.  
52 *J Shoulder Elbow Surg*. 2018; 27(8):1437-43. doi: 10.1016/j.jse.2018.04.004  
53
- 54 [38] Huang Y-P, Fann C-Y, Chiu Y-H, Yen M-F, Chen L-S, Chen H-H, Pan S-L. Association of Diabetes Mellitus  
55 With the Risk of Developing Adhesive Capsulitis of the Shoulder: A Longitudinal Population-Based Follow up  
56 Study. *Arthritis Care & Research*. 2013; 65(7):1197-202. <https://doi.org/10.1002/acr.21938>  
57
- 58 [39] Lo S-F, Chu S-W, Muo C-H, Meng N-H, Chou L-W, Huang W-C, Huang C-M, Sung F-C. Diabetes mellitus and  
59 accompanying hyperlipidemia are independent risk factors for adhesive capsulitis: a nationwide population-  
60 based cohort study. *Rheumatology International*. 2014; 34:67-74. doi: 10.1007/s00296-013-2847-4

- 1  
2  
3 [40] Hardy RJ, Thompson SG. Detecting and describing heterogeneity in meta-analysis. *Stat Med*. 1998;  
4 17(8):841-56. doi: 10.1002/(sici)1097-0258(19980430)17:8<841::aid-sim781>3.0.co;2-d  
5
- 6 [41] Thomas SJ, McDougall C, Brown IDM, Jaber M-C, Stearns A, Ashraf R, Fisher M, Kelly IG. Prevalence of  
7 symptoms and signs of shoulder problems in people with diabetes mellitus. *J Shoulder and Elbow Surg*. 16(6);  
8 748-51. doi: 10.1016/j.jse.2007.02.133  
9
- 10 [42] Bridgeman JF, Periarthritis of the shoulder and diabetes mellitus. *Ann Rheum Dis*. 31: 69-71; 1972. doi:  
11 10.1136/ard.31.1.69  
12
- 13 [43] Herrett E, Gallagher AM, Bhaskaran K, Forbes H, Mathur R, van Staa T, Smeeth L. Data Resource Profile:  
14 Clinical Practice Research Datalink (CPRD). *Int J Epidemiol*. 2015; 44(3):827-36. doi: 10.1093/ije/dyv098.  
15
- 16 [44] Young JC, Conover MM, Jonsson Funk M. Measurement error and misclassification in electronic medical  
17 records: methods to mitigate bias. *Curr Epidemiol Rep*. 2018; 5(4): 343–356. doi: 10.1007/s40471-018-0164-x  
18
- 19 [45] Linsell L, Dawson J, Zondervan K, Rose P, Randall T, Fitzpatrick R, Carr A. Prevalence and incidence of  
20 adults consulting for shoulder conditions in UK primary care; patterns of diagnosis and referral. *Rheumat* 2006;  
21 45(2):215-21.  
22
- 23 [46] Dorrestijn O, Greving K. Patients with shoulder complaints in general practice: consumption of medical  
24 care. *Rheumatol*. 2011; 50(2): 389-95.  
25
- 26 [47] Bunker T Time for a new name for frozen shoulder – contracture of the shoulder. *Shoulder Elbow*. 2009;  
27 1(1):4-9. <https://doi.org/10.1111/j.1758-5740.2009.00007.x>  
28
- 29 [48] Heinze G, Dunkler D. Five myths about variable selection. *Transplant International*. 2017; 30(1):6-10.  
30 <https://doi.org/10.1111/tri.12895>  
31
- 32 [49] Wong PL, Tan HC. A Review on Frozen Shoulder. *Singapore Med J*. 2010; 51(9):694-7. PMID: 20938608  
33
- 34 [50] Cho C-H, Song K-S, Kim B-S, Kim D.H, Lho Y-M. Biological Aspect of Pathophysiology for Frozen Shoulder.  
35 *BioMed Research International*. 2018; Article ID 7274517. <https://doi.org/10.1155/2018/7274517>  
36
- 37 [51] Hwang KR, Murrell GAC, Millar NL, Bonar F, Lam R, Walton JR. Advanced glycation end products in  
38 idiopathic frozen shoulders. *J Shoulder and Elbow Surg*. 2016; 25(6): 981-8. doi: 10.1016/j.jse.2015.10.015  
39
- 40 [52] Goldin A, Beckman JA, Schmidt AM, Creager MA. Advanced Glycation End Products. *Circulation*. 2006;  
41 114(6): 597-605. doi: 10.1161/CIRCULATIONAHA.106.621854.  
42
- 43 [53] Shanmugam N, Reddy MA, Guha M, Natarajan R. High glucose-induced expression of proinflammatory  
44 cytokine and chemokine genes in monocytic cells. *Diabetes*. 2003; 52(5):1256-64. doi:  
45 10.2337/diabetes.52.5.1256  
46
- 47 [54] Lho Y-M, Ha E, Cho C-H, Song K-S, Min B-W, Bae K-C, Lee K-J, Hwang I, Park H-B. Inflammatory cytokines  
48 are overexpressed in the subacromial bursa of frozen shoulder. *J Shoulder and Elbow Surg*. 2013; 22(5): 666-  
49 72. <https://doi.org/10.1016/j.jse.2012.06.014>  
50
- 51 [55] Chan JH, Ho BS, Alvi HM, Saltzman MD, Marra G. The relationship between the incidence of adhesive  
52 capsulitis and hemoglobin A1c. *J Shoulder and Elbow Surg*. 2017; 26(10):1834-7.  
53 <https://doi.org/10.1016/j.jse.2017.03.015>  
54
- 55 [56] Yian EH, Contreras R, Sodl JF. Effects of Glycemic Control on Prevalence of Diabetic Frozen Shoulder. *J*  
56 *Bone Joint Surg*. 2012; 94(10):919-23. doi: 10.2106/JBJS.J.01930  
57  
58  
59  
60

## Figure Captions

**Fig. 1** PRISMA flow diagram summarising record identification and study selection.



1  
2  
3  
4  
5 **Fig. 2** Random effects meta-analysis forest plot of the association between diabetes and the odds of  
6 developing frozen shoulder.  
7

8  
9 **Fig. 3** Influence plot showing the result of repeating the original meta-analysis (Figure 2), each time with a  
10 different primary study removed.  
11

12  
13  
14 **Fig. 4** Funnel plot of log odds ratios for developing frozen shoulder in people with diabetes vs. those without  
15 diabetes.  
16

17  
18  
19  
20  
21  
22  
23  
24  
25  
26  
27  
28  
29  
30  
31  
32  
33  
34  
35  
36  
37  
38  
39  
40  
41  
42  
43  
44  
45  
46  
47  
48  
49  
50  
51  
52  
53  
54  
55  
56  
57  
58  
59  
60

For peer review only

PRISMA 2020 flow diagram for new systematic reviews which included searches of databases, registers, and other sources

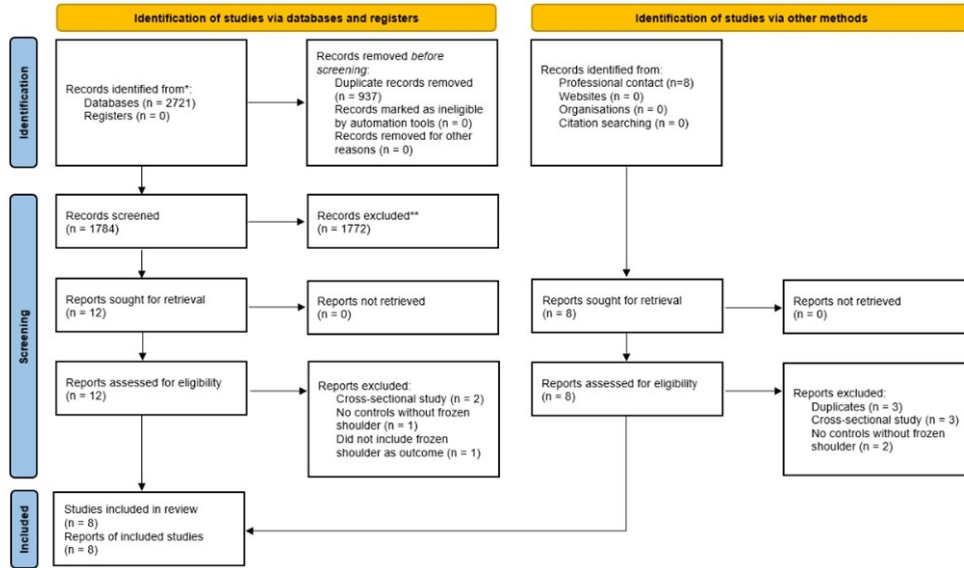

PRISMA flow diagram summarising record identification and study selection.

175x104mm (150 x 150 DPI)

1  
2  
3  
4  
5  
6  
7  
8  
9  
10  
11  
12  
13  
14  
15  
16  
17  
18  
19  
20  
21  
22  
23  
24  
25  
26  
27  
28  
29  
30  
31  
32  
33  
34  
35  
36  
37  
38  
39  
40  
41  
42  
43  
44  
45  
46  
47  
48  
49  
50  
51  
52  
53  
54  
55  
56  
57  
58  
59  
60

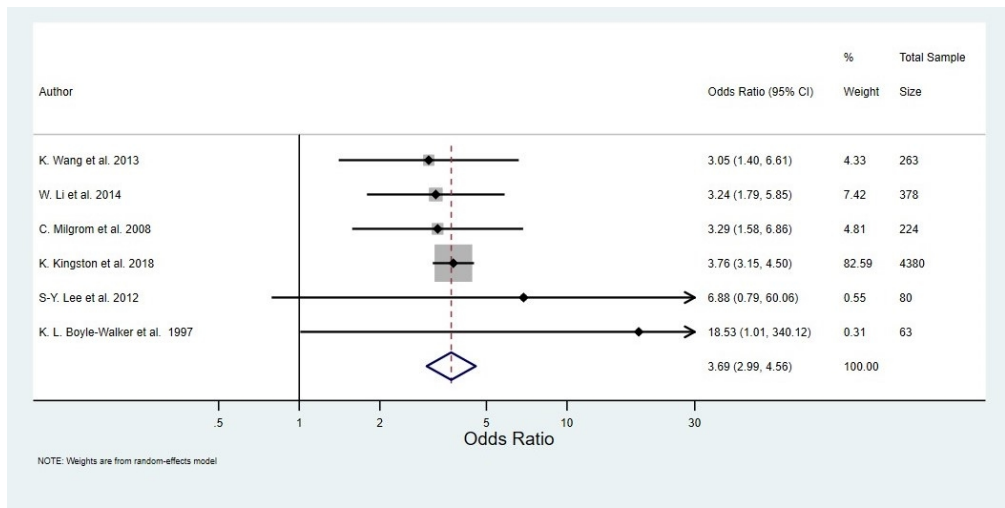

Random effects meta-analysis of the association between diabetes and the odds of developing frozen shoulder.

277x138mm (96 x 96 DPI)

1  
2  
3  
4  
5  
6  
7  
8  
9  
10  
11  
12  
13  
14  
15  
16  
17  
18  
19  
20  
21  
22  
23  
24  
25  
26  
27  
28  
29  
30  
31  
32  
33  
34  
35  
36  
37  
38  
39  
40  
41  
42  
43  
44  
45  
46  
47  
48  
49  
50  
51  
52  
53  
54  
55  
56  
57  
58  
59  
60

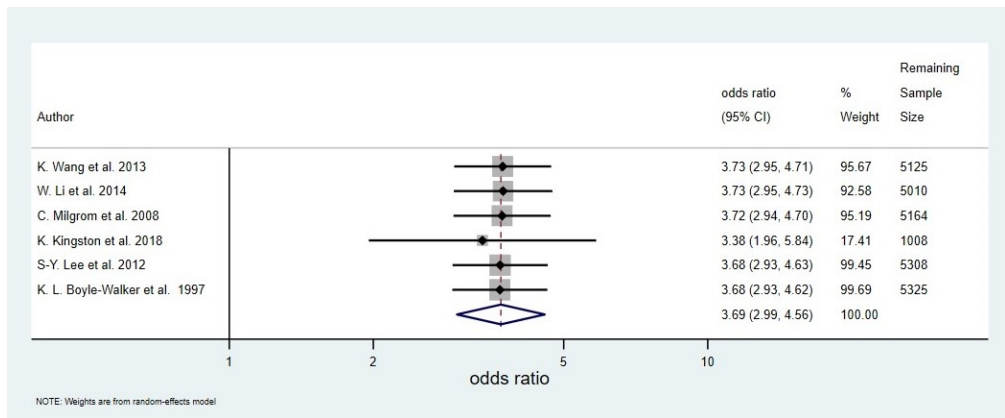

Influence plot showing the result of repeating the original meta-analysis (Figure 2), each time with a different primary study removed.

275x113mm (96 x 96 DPI)

1  
2  
3  
4  
5  
6  
7  
8  
9  
10  
11  
12  
13  
14  
15  
16  
17  
18  
19  
20  
21  
22  
23  
24  
25  
26  
27  
28  
29  
30  
31  
32  
33  
34  
35  
36  
37  
38  
39  
40  
41  
42  
43  
44  
45  
46  
47  
48  
49  
50  
51  
52  
53  
54  
55  
56  
57  
58  
59  
60

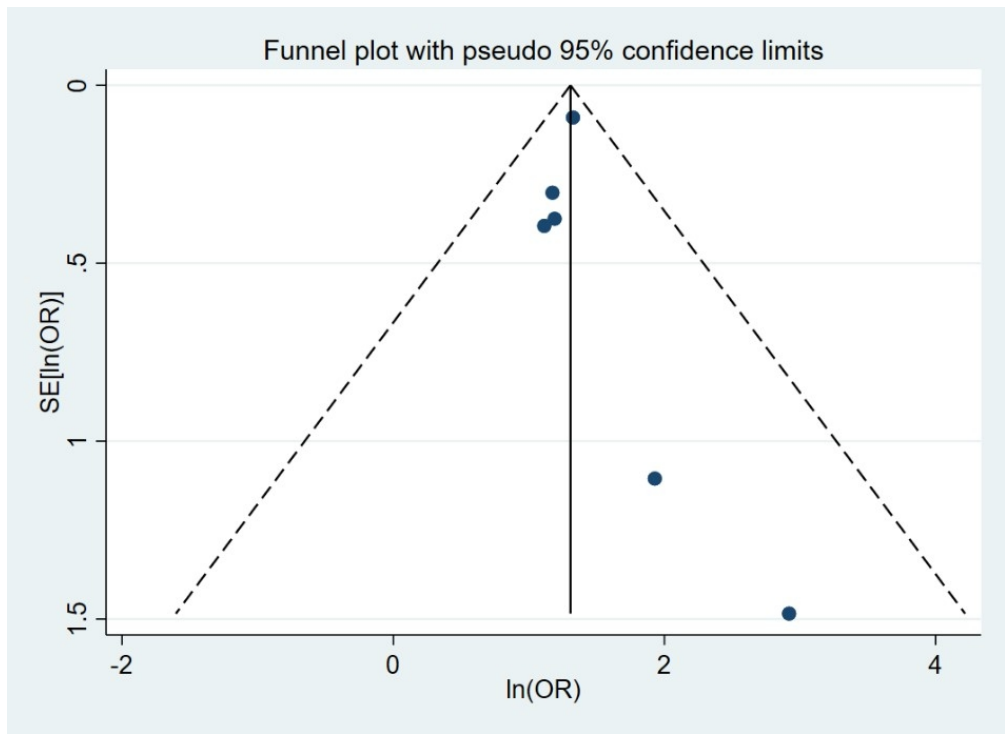

Funnel plot of log odds ratios for developing frozen shoulder in people with diabetes vs. those without diabetes.

109x79mm (220 x 220 DPI)

## Appendix A

The following searches were originally conducted in December 2018 and updated in June 2021.

### MEDLINE

Interface: OVID.

1. ((shoulder\* or glenohumer\* or subacromi\* or acromi\* or rotator cuff) adj3 (instability or bursitis or frozen or impinge\* or tendonitis or tendinitis or pain\* or osteoarthr\* or periarthriti\* or peri arthriti\* or arthralgia)).ti,ab,kw.

2. Shoulder Impingement Syndrome/

3. exp Bursitis/

4. Rotator Cuff/

5. adhesive capsuliti\*.ti,ab,kw.

6. Shoulder Pain/

7. or/1-6

8. exp Pain/

9. pain\*.ti,ab,kw.

10. Arthralgia/

11. arthralgia.ti,ab,kw.

12. or/8-11

13. Shoulder/

14. Shoulder joint/

15. Acromioclavicular Joint/

16. (shoulder\* or glenohumer\* or subacromi\* or acromi\* or rotator cuff).ti,ab,kw.

17. or/13-16

18. 12 and 17

19. 7 or 18

20. exp Diabetes Mellitus/

21. diabet\*.ti,ab,kw.

22. (DMi or DM i).ti,ab,kw.

23. (DM1 or DM 1).ti,ab,kw.

24. (DM2 or DM 2).ti,ab,kw.

25. (DMii or DM ii).ti,ab,kw.

26. (DM adj2 type).ti,ab,kw.

27. or/20-26

1  
2  
3 28. 19 and 27

4 29. exp animals/ not humans/  
5

6 30. 28 not 29  
7  
8

9 **EMBASE**

10 Interface: OVID.

11  
12 1. ((shoulder\* or glenohumer\* or subacromi\* or acromi\* or rotator cuff) adj3 (instability  
13 or bursitis or frozen or impinge\* or tendonitis or tendinitis or pain\* or osteoarthr\* or  
14 periarthriti\* or peri arthriti\* or arthralgia)).ti,ab,kw.  
15

16  
17 2. exp shoulder impingement syndrome/  
18

19 3. exp bursitis/  
20

21 4. exp rotator cuff/  
22

23 5. exp humeroscapular peri arthritis/  
24

25 6. adhesive capsuliti\*.ti,ab,kw.  
26

27 7. exp shoulder pain/  
28

29 8. or/1-7  
30

31 9. exp pain/  
32

33 10. pain\*.ti,ab,kw.  
34

35 11. exp arthralgia/  
36

37 12. arthralgia.ti,ab,kw.  
38

39 13. or/9-12  
40

41 14. exp shoulder/  
42

43 15. Acromioclavicular Joint/  
44

45 16. (shoulder\* or glenohumer\* or subacromi\* or acromi\* or rotator cuff).ti,ab,kw.  
46

47 17. or/14-16  
48

49 18. 13 and 17  
50

51 19. 8 or 18  
52

53 20. exp Diabetes Mellitus/  
54

55 21. diabet\*.ti,ab,kw.  
56

57 22. (DMi or DM i).ti,ab,kw.  
58

59 23. (DM1 or DM1).ti,ab,kw.  
60

24. (DM2 or DM 2).ti,ab,kw.

25. (DMii or DM ii).ti,ab,kw.

1  
2  
3 26. (DM adj2 type).ti,ab,kw.

4 27. or/20-26

5 28. 19 and 27

6 29. exp animals/ not humans/

7 30. 28 not 29

8 31. limit 30 to embase

9  
10  
11  
12  
13  
14 **AMED**

15 Interface: OVID.

16  
17 1. ((shoulder\* or glenohumer\* or subacromi\* or acromi\* or rotator cuff) adj3 (instability  
18 or bursitis or frozen or impinge\* or tendonitis or tendinitis or pain\* or osteoarthr\* or  
19 periarthriti\* or peri arthriti\* or arthralgia)).ti,ab.

20 2. exp Shoulder impingement syndrome/

21 3. exp Bursitis/

22 4. exp Rotator cuff/

23 5. adhesive capsuliti\*.ti,ab.

24 6. exp shoulder pain/

25 7. or/1-6

26 8. exp Pain/

27 9. pain\*.ti,ab.

28 10. exp Arthralgia/

29 11. arthralgia.ti,ab.

30 12. or/8-11

31 13. shoulder/

32 14. (shoulder\* or glenohumer\* or subacromi\* or acromi\* or rotator cuff).ti,ab.

33 15. or/13-14

34 16. 12 and 15

35 17. 7 or 16

36 18. exp Diabetes mellitus/

37 19. diabet\*.ti,ab.

38 20. (DMi or DM i).ti,ab.

39 21. (DM1 or DM 1).ti,ab.

40 22. (DM2 or DM 2).ti,ab.



1  
2  
3 23. (DMii or DM ii).ti,ab.

4 24. (DM adj2 type).ti,ab.

5  
6 25. or/18-24

7  
8 26. 17 and 25

9 27. exp animals/ not humans/

10  
11 28. 26 not 27

12  
13  
14 **PsycINFO**

15 Interface: OVID.

16  
17 1. ((shoulder\* or glenohumer\* or subacromi\* or acromi\* or rotator cuff) adj3 (instability  
18 or bursitis or frozen or impinge\* or tendonitis or tendinitis or pain\* or osteoarthr\* or  
19 periarthriti\* or peri arthriti\* or arthralgia)).ti,ab.

20  
21 2. Shoulder Impingement Syndrome.ti,ab.

22  
23 3. bursitis.ti,ab.

24  
25 4. rotator cuff.ti,ab.

26  
27 5. adhesive capsuliti\*.ti,ab.

28  
29 6. shoulder pain.ti,ab.

30  
31 7. or/1-6

32  
33 8. exp PAIN/

34  
35 9. pain\*.ti,ab.

36  
37 10. arthralgia.ti,ab.

38  
39 11. or/8-10

40  
41 12. \*"shoulder (anatomy)"/

42  
43 13. shoulder\*.ti,ab.

44  
45 14. shoulder joint.ti,ab.

46  
47 15. acromi\*.ti,ab.

48  
49 16. glenohumer\*.ti,ab.

50  
51 17. subacromi\*.ti,ab.

52  
53 18. or/12-17

54  
55 19. 11 and 18

56  
57 20. 7 or 19

58  
59 21. exp DIABETES MELLITUS/

60 22. diabet\*.ti,ab.

- 1  
2  
3 23. (DMi or DM i).ti,ab.  
4 24. (DM1 or DM 1).ti,ab.  
5  
6 25. (DM2 or DM 2).ti,ab.  
7 26. (DMii or DM ii).ti,ab.  
8  
9 27. (DM adj2 type).ti,ab.  
10  
11 28. or/21-27  
12 29. 20 and 28  
13

### 14 15 **Web of Science**

16 Science Citation Index Expanded and the Science Conference Proceedings Citation Index.

17 ((

18  
19  
20 TS=(Shoulder\* NEAR/3 instability) OR TS=(Shoulder\* NEAR/3 bursitis) OR TS=(Shoulder\*  
21  
22 NEAR/3 frozen) OR TS=(Shoulder\* NEAR/3 impinge\*) OR TS=(Shoulder\* NEAR/3 tendonitis) OR TS=(Shoulder\*  
23 NEAR/3 tendinitis) OR TS=(Shoulder\* NEAR/3 pain) OR TS=(Shoulder\*

24  
25 NEAR/3 osteoarthr\*) OR TS=(Shoulder\* NEAR/3 periarthriti\*) OR TS=(Shoulder\* NEAR/3  
26  
27 "peri arthriti\*") OR TS=(Shoulder\* NEAR/3 arthralgia)

28 OR

29  
30 TS=(glenohumer\* NEAR/3 instability) OR TS=(glenohumer\* NEAR/3 bursitis) OR TS=(glenohumer\*  
31  
32 NEAR/3 frozen) OR TS=(glenohumer\* NEAR/3 impinge\*) OR TS=(glenohumer\* NEAR/3  
33  
34 tendonitis) OR TS=(glenohumer\* NEAR/3 tendinitis) OR TS=(glenohumer\* NEAR/3 pain)

35  
36 OR TS=(glenohumer\* NEAR/3 osteoarthr\*) OR TS=(glenohumer\* NEAR/3 periarthriti\*) OR  
37  
38 TS=(glenohumer\* NEAR/3 "peri arthriti\*") OR TS=(glenohumer\* NEAR/3 arthralgia)

39 OR

40  
41 TS=(subacromi\* NEAR/3 instability) OR TS=(subacromi\* NEAR/3 bursitis) OR TS=(subacromi\*  
42  
43 NEAR/3 frozen) OR TS=(subacromi\* NEAR/3 impinge\*) OR TS=(subacromi\* NEAR/3 tendonitis) OR  
44  
45 TS=(subacromi\* NEAR/3 tendinitis) OR TS=(subacromi\* NEAR/3 pain) OR TS=(subacromi\*  
46  
47 NEAR/3 osteoarthr\*) OR TS=(subacromi\* NEAR/3 periarthriti\*) OR TS=(subacromi\* NEAR/3

48  
49 "peri arthriti\*") OR TS=(subacromi\* NEAR/3 arthralgia)

50 OR

51  
52 TS=(acromi\* NEAR/3 instability) OR TS=(acromi\* NEAR/3 bursitis) OR TS=(acromi\* NEAR/3  
53  
54 frozen) OR TS=(acromi\* NEAR/3 impinge\*) OR TS=(acromi\* NEAR/3 tendonitis) OR TS=(acromi\*  
55  
56 NEAR/3 tendinitis) OR TS=(acromi\* NEAR/3 pain) OR TS=(acromi\* NEAR/3 osteoarthr\*)

57  
58 OR TS=(acromi\* NEAR/3 periarthriti\*) OR TS=(acromi\* NEAR/3 "peri arthriti\*") OR TS=(acromi\*  
59  
60 NEAR/3 arthralgia)

1  
2  
3 OR

4 TS=("rotator cuff" NEAR/3 instability) OR TS=("rotator cuff" NEAR/3 bursitis) OR TS=("rotator cuff" NEAR/3  
5 frozen) OR TS=("rotator cuff" NEAR/3 impinge\*) OR TS=("rotator cuff" NEAR/3

6 tendonitis) OR TS=("rotator cuff" NEAR/3 tendinitis) OR TS=("rotator cuff" NEAR/3 pain)

7 OR TS=("rotator cuff" NEAR/3 osteoarthr\*) OR TS=("rotator cuff" NEAR/3 periarthriti\*) OR

8 TS=("rotator cuff" NEAR/3 "peri arthriti\*") OR TS=("rotator cuff" NEAR/3 arthralgia)

9 OR

10 TS=("Rotator cuff")

11 OR

12 TS=("Adhesive capsuliti\*")

13 )

14 OR

15 TS=( arthralgia NEAR/3 shoulder\* or arthralgia NEAR/3 glenohumer\* or arthralgia NEAR/3

16 subacromi\* or arthralgia NEAR/3 acromi\* or arthralgia NEAR/3 "rotator cuff")

17 OR TS=( pain\* NEAR/3 shoulder\* or pain\* NEAR/3 glenohumer\* or pain\* NEAR/3 subacromi\* or pain\* NEAR/3  
18 acromi\* or pain\* NEAR/3 "rotator cuff")

19 )

20 And

21 TS=(diabet\* or DM1 or "DM 1" or DM2 or "DM 2" or DMi or "DM i" or DMii or "DM ii" or

22 DM NEAR/2 type)

23  
24  
25  
26  
27  
28  
29  
30  
31  
32  
33  
34  
35  
36 **CINAHL**

37 Interface: EBSCO. Filters: title or abstract

38 (

39 ((shoulder\* or glenohumer\* or subacromi\* or acromi\* or "rotator cuff") N3 (instability or bursitis or frozen or  
40 impinge\* or tendonitis or tendinitis or pain\* or osteoarthr\* or periarthriti\* or

41 "peri arthriti\*" or arthralgia))

42 OR

43 (MH "Shoulder Impingement Syndrome") OR (MH "Bursitis+") OR (MH "Rotator Cuff+") OR

44 (MH "Periarthritis") OR (MH "Adhesive Capsulitis+") OR (MH "Shoulder Pain")

45 OR

46 ((MH "Pain+" or pain or (MH "Arthralgia+" or arthralgia) and ((MH "Shoulder") or (MH

47 "Acromioclavicular Joint") or shoulder\* or glenohumer\* or subacromi\* or acromi\* or "rotator

48 cuff")

1  
2  
3 )

4 AND

5 ((MH "Diabetes Mellitus+") or diabet\* or (DMi or "DM i") or (DM1 or "DM 1") or (DMii or  
6 "DM ii") or (DM2 or "DM 2") or (DM N2 type))

7  
8  
9  
10  
11 **Epistemonikos**

12 Filters: title or abstract. Primary study. Not an RCT.

13 ("frozen shoulder" or "shoulder impinge\*" or "shoulder bursitis" or "shoulder tendonitis" or  
14 "shoulder tendinitis" or "shoulder pain" or "pain in the shoulder" or "painful shoulder" or  
15 "shoulder osteoarthr\*" or "shoulder joint arthr\*" or "shoulder arthr")

16 OR

17 ("glenohumeral impinge\*" or "glenohumeral bursitis" or "glenohumeral tendonitis" or "glenohumeral  
18 tendinitis" or "glenohumeral pain" or "pain in the glenohumeral" or "glenohumeral  
19 osteoarthr\*" or "glenohumeral arthr\*" or "glenohumeral arthr")

20 OR

21 ("subacromial impinge\*" or "subacromial bursitis" or "subacromial tendonitis" or "subacromial  
22 tendinitis" or "subacromial pain" or "pain in the subacromial" or "subacromial osteoarthr\*" or  
23 "subacromial arthr\*" or "subacromial arthr")

24 OR

25 "Rotator cuff"

26 OR

27 "periarthriti\*"

28 OR

29 "peri arthriti\*"

30 OR

31 "Adhesive capsuliti\*"

32 )

33 AND

34 (diabet\* or DM1 or DM2 or DMi or DMii or "type 1 DM" or "type 2 DM" or "type i DM" or  
35 "type ii DM")

36  
37  
38  
39  
40  
41  
42  
43  
44  
45  
46  
47  
48  
49  
50  
51  
52  
53  
54  
55  
56 **TRIP**

1  
2  
3 (“frozen shoulder” or “shoulder pain” or “periathriti\*” or “peri arthriti\*” or “adhesive capsuliti\*” or “shoulder  
4 impingement” or “bursitis” or “rotator cuff”) and “diabet\*”  
5

6  
7 **PEDro**

8 Filters: body part = upper arm, shoulder or shoulder girdle  
9

10 Title and abstract search: diabet\*  
11  
12

13 **Open Grey**

14 Search 1: Diabet\* and shoulder\*  
15

16 Search 2: Diabet\* and glenohumer\*  
17

18 Search 3: Diabet\* and subacromi\*  
19

20 Search 4: Diabet\* and acromi\*  
21

22 Search 5: Diabet\* and “rotator cuff\*”  
23

24 Search 6: Diabet\* and bursitis  
25

26 Search 7: Diabet\* and periarthriti\*  
27

28 Search 8: Diabet\* and “peri arthriti\*”  
29

30 Search 9: Diabet\* and “adhesive capsuliti\*”  
31

32 Search 10: Diabet\* and arthralgia  
33

34 **Grey literature report**

35 Diabet\*  
36  
37  
38  
39  
40  
41  
42  
43  
44  
45  
46  
47  
48  
49  
50  
51  
52  
53  
54  
55  
56  
57  
58  
59  
60

## Appendix B

**Fig. B.1** Bar graph of QUIPS scores for each of the six bias domains: study participation, study attrition, diabetes/risk factor (RF) measurement, frozen shoulder/outcome measurement, study confounding, statistical analysis and reporting.

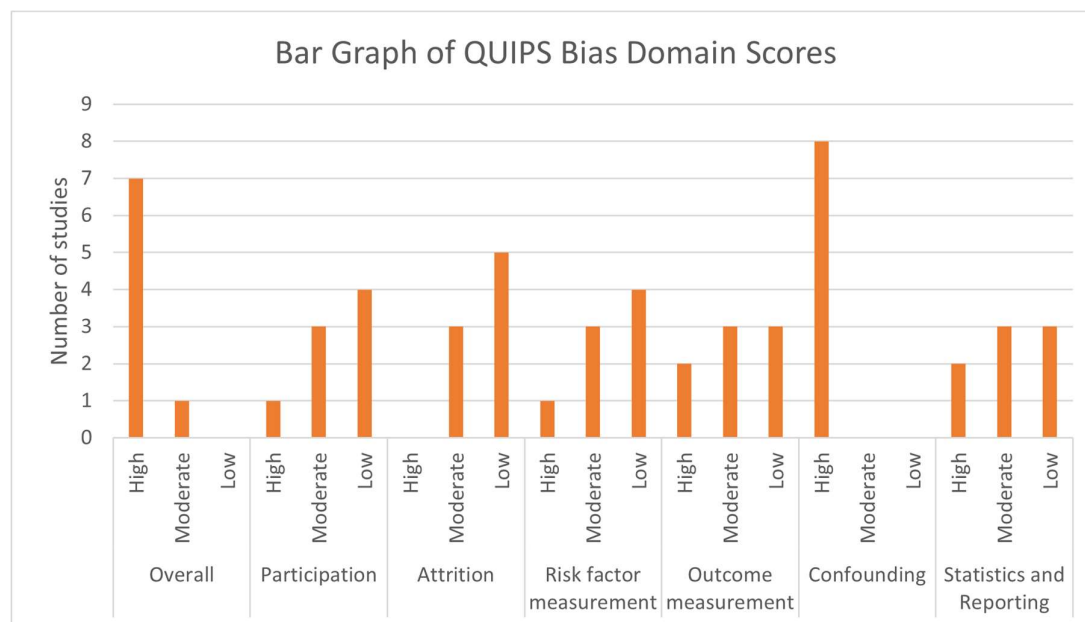

## Appendix C

| <b>Table C.1</b> Raw data from each study. |                                |                    |                                                               |                                                                  |
|--------------------------------------------|--------------------------------|--------------------|---------------------------------------------------------------|------------------------------------------------------------------|
| <b>Case-Control Studies</b>                |                                |                    |                                                               |                                                                  |
| Source                                     | Number of cases                | Number of controls | Number of cases with diabetes                                 | Number of controls with diabetes                                 |
| K. L. Boyle-Walker, et al., 1997 [32]      | 32                             | 31                 | 7                                                             | 0                                                                |
| W. Li, et al., 2014 [33]                   | 182                            | 196                | 44                                                            | 18                                                               |
| S-Y. Lee, et al., 2012 [34]                | 40                             | 40                 | 6                                                             | 1                                                                |
| C. Milgrom, et al., 2008 [35]              | 126                            | 98                 | 37                                                            | 11                                                               |
| K. Wang, et al., 2013 [36]                 | 87                             | 176                | 17                                                            | 13                                                               |
| K. Kingston, et al., 2018 [37]             | 2190                           | 2190               | 572                                                           | 188                                                              |
| <b>Cohort studies</b>                      |                                |                    |                                                               |                                                                  |
| Source                                     | Number of people with diabetes | Number of controls | Number of people with diabetes that developed frozen shoulder | Number of people without diabetes that developed frozen shoulder |
| Y-P. Huang, et al., 2013 [38]              | 78,827                         | 236,481            | 946                                                           | 2254                                                             |
| S-F. Lo, et al., 2013 [39]                 | 5109                           | 20,473             | 553                                                           | 768                                                              |

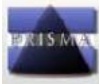

## PRISMA 2020 for Abstracts Checklist

| Section and Topic       | Item # | Checklist item                                                                                                                                                                                                                                                                                        | Reported (Yes/No) |
|-------------------------|--------|-------------------------------------------------------------------------------------------------------------------------------------------------------------------------------------------------------------------------------------------------------------------------------------------------------|-------------------|
| <b>TITLE</b>            |        |                                                                                                                                                                                                                                                                                                       |                   |
| Title                   | 1      | Identify the report as a systematic review.                                                                                                                                                                                                                                                           | Y                 |
| <b>BACKGROUND</b>       |        |                                                                                                                                                                                                                                                                                                       |                   |
| Objectives              | 2      | Provide an explicit statement of the main objective(s) or question(s) the review addresses.                                                                                                                                                                                                           | Y                 |
| <b>METHODS</b>          |        |                                                                                                                                                                                                                                                                                                       |                   |
| Eligibility criteria    | 3      | Specify the inclusion and exclusion criteria for the review.                                                                                                                                                                                                                                          | Y                 |
| Information sources     | 4      | Specify the information sources (e.g. databases, registers) used to identify studies and the date when each was last searched.                                                                                                                                                                        | Y                 |
| Risk of bias            | 5      | Specify the methods used to assess risk of bias in the included studies.                                                                                                                                                                                                                              | Y                 |
| Synthesis of results    | 6      | Specify the methods used to present and synthesise results.                                                                                                                                                                                                                                           | Y                 |
| <b>RESULTS</b>          |        |                                                                                                                                                                                                                                                                                                       |                   |
| Included studies        | 7      | Give the total number of included studies and participants and summarise relevant characteristics of studies.                                                                                                                                                                                         | Y                 |
| Synthesis of results    | 8      | Present results for main outcomes, preferably indicating the number of included studies and participants for each. If meta-analysis was done, report the summary estimate and confidence/credible interval. If comparing groups, indicate the direction of the effect (i.e. which group is favoured). | Y                 |
| <b>DISCUSSION</b>       |        |                                                                                                                                                                                                                                                                                                       |                   |
| Limitations of evidence | 9      | Provide a brief summary of the limitations of the evidence included in the review (e.g. study risk of bias, inconsistency and imprecision).                                                                                                                                                           | Y                 |
| Interpretation          | 10     | Provide a general interpretation of the results and important implications.                                                                                                                                                                                                                           | Y                 |
| <b>OTHER</b>            |        |                                                                                                                                                                                                                                                                                                       |                   |
| Funding                 | 11     | Specify the primary source of funding for the review.                                                                                                                                                                                                                                                 | Y                 |
| Registration            | 12     | Provide the register name and registration number.                                                                                                                                                                                                                                                    | Y                 |

From: Page MJ, McKenzie JE, Bossuyt PM, Boutron I, Hoffmann TC, Mulrow CD, et al. The PRISMA 2020 statement: an updated guideline for reporting systematic reviews. *BMJ* 2021;372:n71. doi: 10.1136/bmj.n71

For more information, visit: <http://www.prisma-statement.org/>



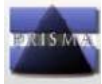

## PRISMA 2020 Checklist

| Section and Topic             | Item # | Checklist item                                                                                                                                                                                                                                                                                       | Location where item is reported |
|-------------------------------|--------|------------------------------------------------------------------------------------------------------------------------------------------------------------------------------------------------------------------------------------------------------------------------------------------------------|---------------------------------|
| <b>TITLE</b>                  |        |                                                                                                                                                                                                                                                                                                      |                                 |
| Title                         | 1      | Identify the report as a systematic review.                                                                                                                                                                                                                                                          | Title                           |
| <b>ABSTRACT</b>               |        |                                                                                                                                                                                                                                                                                                      |                                 |
| Abstract                      | 2      | See the PRISMA 2020 for Abstracts checklist.                                                                                                                                                                                                                                                         | Abstract checklist attached     |
| <b>INTRODUCTION</b>           |        |                                                                                                                                                                                                                                                                                                      |                                 |
| Rationale                     | 3      | Describe the rationale for the review in the context of existing knowledge.                                                                                                                                                                                                                          | Introduction paragraph 4        |
| Objectives                    | 4      | Provide an explicit statement of the objective(s) or question(s) the review addresses.                                                                                                                                                                                                               | Introduction paragraph 4        |
| <b>METHODS</b>                |        |                                                                                                                                                                                                                                                                                                      |                                 |
| Eligibility criteria          | 5      | Specify the inclusion and exclusion criteria for the review and how studies were grouped for the syntheses.                                                                                                                                                                                          | Section 2.3                     |
| Information sources           | 6      | Specify all databases, registers, websites, organisations, reference lists and other sources searched or consulted to identify studies. Specify the date when each source was last searched or consulted.                                                                                            | Section 2.1                     |
| Search strategy               | 7      | Present the full search strategies for all databases, registers and websites, including any filters and limits used.                                                                                                                                                                                 | Appendix A                      |
| Selection process             | 8      | Specify the methods used to decide whether a study met the inclusion criteria of the review, including how many reviewers screened each record and each report retrieved, whether they worked independently, and if applicable, details of automation tools used in the process.                     | Section 2.2                     |
| Data collection process       | 9      | Specify the methods used to collect data from reports, including how many reviewers collected data from each report, whether they worked independently, any processes for obtaining or confirming data from study investigators, and if applicable, details of automation tools used in the process. | Section 2.4                     |
| Data items                    | 10a    | List and define all outcomes for which data were sought. Specify whether all results that were compatible with each outcome domain in each study were sought (e.g. for all measures, time points, analyses), and if not, the methods used to decide which results to collect.                        | Section 2.3, 2.4                |
|                               | 10b    | List and define all other variables for which data were sought (e.g. participant and intervention characteristics, funding sources). Describe any assumptions made about any missing or unclear information.                                                                                         | Section 2.4                     |
| Study risk of bias assessment | 11     | Specify the methods used to assess risk of bias in the included studies, including details of the tool(s) used, how many reviewers assessed each study and whether they worked independently, and if applicable, details of automation tools used in the process.                                    | Section 2.4                     |
| Effect measures               | 12     | Specify for each outcome the effect measure(s) (e.g. risk ratio, mean difference) used in the synthesis or presentation of results.                                                                                                                                                                  | Section 2.5                     |
| Synthesis methods             | 13a    | Describe the processes used to decide which studies were eligible for each synthesis (e.g. tabulating the study intervention characteristics and comparing against the planned groups for each synthesis (item #5)).                                                                                 | Section 2.5 lines 1-3.          |
|                               | 13b    | Describe any methods required to prepare the data for presentation or synthesis, such as handling of missing summary statistics, or data conversions.                                                                                                                                                | Section 2.5 lines 4-6           |
|                               | 13c    | Describe any methods used to tabulate or visually display results of individual studies and syntheses.                                                                                                                                                                                               | Section 2.5 line 12             |
|                               | 13d    | Describe any methods used to synthesize results and provide a rationale for the choice(s). If meta-analysis was performed, describe the model(s), method(s) to identify the presence and extent of statistical heterogeneity, and software package(s) used.                                          | Section 2.5                     |
|                               | 13e    | Describe any methods used to explore possible causes of heterogeneity among study results (e.g. subgroup analysis, meta-regression).                                                                                                                                                                 | n/a Not enough                  |

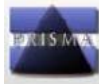

## PRISMA 2020 Checklist

| Section and Topic             | Item # | Checklist item                                                                                                                                                                                                                                                                       | Location where item is reported                               |
|-------------------------------|--------|--------------------------------------------------------------------------------------------------------------------------------------------------------------------------------------------------------------------------------------------------------------------------------------|---------------------------------------------------------------|
|                               |        |                                                                                                                                                                                                                                                                                      | studies present to do this                                    |
|                               | 13f    | Describe any sensitivity analyses conducted to assess robustness of the synthesized results.                                                                                                                                                                                         | Section 2.5 lines 14-16                                       |
| Reporting bias assessment     | 14     | Describe any methods used to assess risk of bias due to missing results in a synthesis (arising from reporting biases).                                                                                                                                                              | n/a no missing results                                        |
| Certainty assessment          | 15     | Describe any methods used to assess certainty (or confidence) in the body of evidence for an outcome.                                                                                                                                                                                | n/a                                                           |
| <b>RESULTS</b>                |        |                                                                                                                                                                                                                                                                                      |                                                               |
| Study selection               | 16a    | Describe the results of the search and selection process, from the number of records identified in the search to the number of studies included in the review, ideally using a flow diagram.                                                                                         | Section 1 paragraph 1, Figure 1                               |
|                               | 16b    | Cite studies that might appear to meet the inclusion criteria, but which were excluded, and explain why they were excluded.                                                                                                                                                          | Figure 1                                                      |
| Study characteristics         | 17     | Cite each included study and present its characteristics.                                                                                                                                                                                                                            | Table 1                                                       |
| Risk of bias in studies       | 18     | Present assessments of risk of bias for each included study.                                                                                                                                                                                                                         | Table 2                                                       |
| Results of individual studies | 19     | For all outcomes, present, for each study: (a) summary statistics for each group (where appropriate) and (b) an effect estimate and its precision (e.g. confidence/credible interval), ideally using structured tables or plots.                                                     | Figure 2                                                      |
| Results of syntheses          | 20a    | For each synthesis, briefly summarise the characteristics and risk of bias among contributing studies.                                                                                                                                                                               | Table 1                                                       |
|                               | 20b    | Present results of all statistical syntheses conducted. If meta-analysis was done, present for each the summary estimate and its precision (e.g. confidence/credible interval) and measures of statistical heterogeneity. If comparing groups, describe the direction of the effect. | Section 3 paragraph 4                                         |
|                               | 20c    | Present results of all investigations of possible causes of heterogeneity among study results.                                                                                                                                                                                       | n/a not enough studies to investigate causes of heterogeneity |
|                               | 20d    | Present results of all sensitivity analyses conducted to assess the robustness of the synthesized results.                                                                                                                                                                           | Section 3 paragraph 4, Figure 3                               |
| Reporting biases              | 21     | Present assessments of risk of bias due to missing results (arising from reporting biases) for each synthesis assessed.                                                                                                                                                              | n/a no missing results                                        |
| Certainty of evidence         | 22     | Present assessments of certainty (or confidence) in the body of evidence for each outcome assessed.                                                                                                                                                                                  | n/a                                                           |
| <b>DISCUSSION</b>             |        | For peer review only - <a href="http://bmjopen.bmj.com/site/about/guidelines.xhtml">http://bmjopen.bmj.com/site/about/guidelines.xhtml</a>                                                                                                                                           |                                                               |

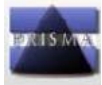

## PRISMA 2020 Checklist

| Section and Topic                              | Item # | Checklist item                                                                                                                                                                                                                             | Location where item is reported                                  |
|------------------------------------------------|--------|--------------------------------------------------------------------------------------------------------------------------------------------------------------------------------------------------------------------------------------------|------------------------------------------------------------------|
| Discussion                                     | 23a    | Provide a general interpretation of the results in the context of other evidence.                                                                                                                                                          | Section 4, paragraphs 1-3                                        |
|                                                | 23b    | Discuss any limitations of the evidence included in the review.                                                                                                                                                                            | Section 4, paragraphs 4-6                                        |
|                                                | 23c    | Discuss any limitations of the review processes used.                                                                                                                                                                                      | n/a we did not come across any limitations of the review process |
|                                                | 23d    | Discuss implications of the results for practice, policy, and future research.                                                                                                                                                             | Section 4, paragraphs 7-9, Section 5.                            |
| <b>OTHER INFORMATION</b>                       |        |                                                                                                                                                                                                                                            |                                                                  |
| Registration and protocol                      | 24a    | Provide registration information for the review, including register name and registration number, or state that the review was not registered.                                                                                             | PROSPERO registration number is included in abstract             |
|                                                | 24b    | Indicate where the review protocol can be accessed, or state that a protocol was not prepared.                                                                                                                                             | PROSPERO registration number is included in abstract             |
|                                                | 24c    | Describe and explain any amendments to information provided at registration or in the protocol.                                                                                                                                            | PROSPERO registration number is included in abstract             |
| Support                                        | 25     | Describe sources of financial or non-financial support for the review, and the role of the funders or sponsors in the review.                                                                                                              | Funding section                                                  |
| Competing interests                            | 26     | Declare any competing interests of review authors.                                                                                                                                                                                         | Conflicts of interest statement                                  |
| Availability of data, code and other materials | 27     | Report which of the following are publicly available and where they can be found: template data collection forms; data extracted from included studies; data used for all analyses; analytic code; any other materials used in the review. | Appendix B, C                                                    |

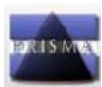

## PRISMA 2020 Checklist

1  
2  
3  
4  
5  
6  
7  
8  
9  
10  
11  
12  
13  
14  
15  
16  
17  
18  
19  
20  
21  
22  
23  
24  
25  
26  
27  
28  
29  
30  
31  
32  
33  
34  
35  
36  
37  
38  
39  
40  
41  
42  
43  
44  
45  
46  
47

From: Page MJ, McKenzie JE, Bossuyt PM, Boutron I, Hoffmann TC, Mulrow CD, et al. The PRISMA 2020 statement: an updated guideline for reporting systematic reviews. *BMJ* 2021;372:n71. doi: 10.1136/bmj.n71  
For more information, visit: <http://www.prisma-statement.org/>

For peer review only

# BMJ Open

## Diabetes as a Risk Factor for the Onset of Frozen Shoulder: A Systematic Review and Meta-Analysis

|                                 |                                                                                                                                                                                                                                                                                                                                                                                                                                                                                             |
|---------------------------------|---------------------------------------------------------------------------------------------------------------------------------------------------------------------------------------------------------------------------------------------------------------------------------------------------------------------------------------------------------------------------------------------------------------------------------------------------------------------------------------------|
| Journal:                        | <i>BMJ Open</i>                                                                                                                                                                                                                                                                                                                                                                                                                                                                             |
| Manuscript ID                   | bmjopen-2022-062377.R2                                                                                                                                                                                                                                                                                                                                                                                                                                                                      |
| Article Type:                   | Original research                                                                                                                                                                                                                                                                                                                                                                                                                                                                           |
| Date Submitted by the Author:   | 24-Nov-2022                                                                                                                                                                                                                                                                                                                                                                                                                                                                                 |
| Complete List of Authors:       | Dyer, Brett; Keele University, Primary Care Centre Versus Arthritis, School of Medicine<br>Rathod, Trishna; Keele University, Primary Care Centre Versus Arthritis, School of Medicine<br>Burton, Claire; Keele University, Primary Care Centre Versus Arthritis, School of Medicine<br>van der Windt, Danielle; Keele University, Primary Care Centre Versus Arthritis, School of Medicine<br>Bucknall, Milica; Keele University, Primary Care Centre Versus Arthritis, School of Medicine |
| <b>Primary Subject Heading</b>: | Rheumatology                                                                                                                                                                                                                                                                                                                                                                                                                                                                                |
| Secondary Subject Heading:      | Diabetes and endocrinology, Epidemiology                                                                                                                                                                                                                                                                                                                                                                                                                                                    |
| Keywords:                       | DIABETES & ENDOCRINOLOGY, EPIDEMIOLOGY, PRIMARY CARE, RHEUMATOLOGY                                                                                                                                                                                                                                                                                                                                                                                                                          |
|                                 |                                                                                                                                                                                                                                                                                                                                                                                                                                                                                             |

SCHOLARONE™  
Manuscripts



I, the Submitting Author has the right to grant and does grant on behalf of all authors of the Work (as defined in the below author licence), an exclusive licence and/or a non-exclusive licence for contributions from authors who are: i) UK Crown employees; ii) where BMJ has agreed a CC-BY licence shall apply, and/or iii) in accordance with the terms applicable for US Federal Government officers or employees acting as part of their official duties; on a worldwide, perpetual, irrevocable, royalty-free basis to BMJ Publishing Group Ltd ("BMJ") its licensees and where the relevant Journal is co-owned by BMJ to the co-owners of the Journal, to publish the Work in this journal and any other BMJ products and to exploit all rights, as set out in our [licence](#).

The Submitting Author accepts and understands that any supply made under these terms is made by BMJ to the Submitting Author unless you are acting as an employee on behalf of your employer or a postgraduate student of an affiliated institution which is paying any applicable article publishing charge ("APC") for Open Access articles. Where the Submitting Author wishes to make the Work available on an Open Access basis (and intends to pay the relevant APC), the terms of reuse of such Open Access shall be governed by a Creative Commons licence – details of these licences and which [Creative Commons](#) licence will apply to this Work are set out in our licence referred to above.

Other than as permitted in any relevant BMJ Author's Self Archiving Policies, I confirm this Work has not been accepted for publication elsewhere, is not being considered for publication elsewhere and does not duplicate material already published. I confirm all authors consent to publication of this Work and authorise the granting of this licence.

## Title Page

**Authors:** Brett P Dyer, Trishna Rathod-Mistry, Claire Burton, Danielle A van der Windt, Miliča Blagojevic-Bucknall.

**Title:** Diabetes as a Risk Factor for the Onset of Frozen Shoulder: A Systematic Review and Meta-Analysis.

**Affiliation:** Primary Care Centre Versus Arthritis, School of Medicine, Keele University, Staffordshire, UK

**Corresponding Author:** Brett P Dyer. **Email:** [b.p.dyer@keele.ac.uk](mailto:b.p.dyer@keele.ac.uk)

**ORCID ID's:** Brett P Dyer: 0000-0001-8039-7631, Trishna Rathod-Mistry: 0000-0002-6369-4746, Claire Burton 0000-0003-4688-3075, Danielle A van der Windt: 0000-0002-7248-6703, Miliča Blagojevic-Bucknall: 0000-0001-7230-7771.

**Word count:** 3275 words.

## Title

Diabetes as a Risk Factor for the Onset of Frozen Shoulder: A Systematic Review and Meta-Analysis

## Abstract

**Objective** Summarise longitudinal observational studies to determine whether diabetes (types 1 and 2) is a risk factor for frozen shoulder.

**Design** Systematic review and meta-analysis.

**Data sources** MEDLINE, EMBASE, AMED, PsycINFO, Web of Science core collection, CINAHL, Epistemonikos, Trip, PEDro, OpenGrey, and The Grey Literature Report were searched on January 2019 and updated in June 2021. Reference screening and emailing professional contacts were also utilised.

**Eligibility criteria** Longitudinal observational studies that estimated the association between diabetes and developing frozen shoulder.

**Data extraction and synthesis** Data extraction was completed by one reviewer and independently checked by another using a pre-defined extraction sheet. Risk of bias was judged using the Quality In Prognosis Studies tool. For studies providing sufficient data, random-effects meta-analysis was used to derive summary estimates of the association between diabetes and the onset of frozen shoulder.

**Results** A meta-analysis of six case-control studies including 5388 people estimated the odds of developing frozen shoulder for people with diabetes to be 3.69 (95% CI: 2.99, 4.56) times the odds for people without diabetes. Two cohort studies were identified, both suggesting diabetes was associated with frozen shoulder, with hazard ratios of 1.32 (95% CI: 1.22, 1.42) and 1.67 (95% CI: 1.46, 1.91). Risk of bias was judged as high in seven studies and moderate in one study.

**Conclusions** People with diabetes are more likely to develop frozen shoulder. Risk of unmeasured confounding was the main limitation of this systematic review. High-quality studies are needed to confirm the strength of, and understand reasons for, the association.

**PROSPERO registration number** CRD42019122963.

**Funding** This work was supported by Versus Arthritis grant number 21899.

**Keywords:** Diabetes, Frozen shoulder, Adhesive capsulitis, Risk factor, Meta-analysis

## Strengths and limitations of this study

- This systematic review is the first to summarise the results of studies estimating the longitudinal association between diabetes and the onset of frozen shoulder.
- Robust meta-analytic methods were used to synthesise and analyse data.
- Sensitivity to influential estimates and sensitivity to small study bias were assessed.
- Risk of bias was judged to be high in seven studies and moderate in one study; this limits the certainty in evidence.
- Only two cohort studies were identified which meant that pooling of association estimates was not suitable.



## 1 - Introduction

Frozen shoulder, also known as adhesive capsulitis, is a painful and severely debilitating condition. The inflammatory contracture of the glenohumeral joint capsule in frozen shoulder restricts both active and passive range of motion, with loss of external rotation being especially characteristic of this condition [1].

Frozen shoulder generally presents between the ages of 50 and 60 years and rarely presents before 40 years [2]. Women (58%) are more likely to develop frozen shoulder than men (42%) [3]. The contralateral shoulder is also affected in 6% to 17% of patients [4]. Although the exact aetiology remains unclear, several factors have been found to be associated with frozen shoulder, including trauma [3], thyroid dysfunction [5-7], cardiovascular disease [2,8], metabolic factors [7,9-11], and other musculoskeletal conditions such as Dupuytren's contracture [12,13]. The most common comorbidity in people with frozen shoulder is diabetes [2], both type 1 and type 2 [6]. The prevalence of frozen shoulder in the general population is around 0.75% [1], but the prevalence of frozen shoulder in people with diabetes is much higher. A meta-analysis of 13 cross-sectional studies estimated the prevalence of frozen shoulder in populations with diabetes to be 13.4% (95% confidence interval (CI): 10.2%, 17.2%) [14].

Diabetes is a term used to describe a group of chronic diseases characterised by hyperglycaemia. The two most prevalent types of diabetes are type 1 and type 2, making up 8% and 90% of cases, respectively [15]. It is well-known that people with diabetes are at risk of complications such as cardiovascular disease, retinopathy, neuropathy, and nephropathy [16], although the musculoskeletal complications of diabetes are not as well-known [17]. Musculoskeletal conditions, such as frozen shoulder, can significantly affect the quality of a patient's life and should not be overlooked. Our previous systematic review and narrative synthesis of 28 studies has shown that patients with diabetes may experience worse outcomes from frozen shoulder than people without frozen shoulder [18].

It has been suggested that diabetes may be a cause of frozen shoulder through glycation processes and/or inflammatory processes leading to capsular fibrosis and subsequent contracture [7,19,20]. To understand whether diabetes could potentially be a cause of frozen shoulder it is necessary (although not sufficient) to have evidence of the temporal relationship between diabetes and frozen shoulder [21]. This systematic review aims to summarise evidence from longitudinal observational studies to understand the temporal relationship between diabetes and frozen shoulder.

## 2 - Methods

### 2.1 – Search Strategy

The protocol for this systematic review was registered on PROSPERO (CRD42019122963) and the review was conducted and reported using PRISMA guidelines [22]. A systematic literature search of MEDLINE, EMBASE, AMED, PsycINFO, Web of Science core collection, CINAHL, Epistemonikos, Trip, PEDro, OpenGrey, and The Grey Literature Report was carried out in January 2019 and updated in June 2021. Reference lists of eligible studies were screened. Additionally, a professional contact of one author (DAvdW) was contacted to identify further studies. We retrieved all epidemiological studies containing index terms (e.g. Medical Subject Headings) and free-text words related to diabetes and shoulder pain more generally (not limited to frozen shoulder) to reduce the risk of missing potentially relevant publications. The search strategy for MEDLINE, which was constructed with the support of a health information specialist, can be found in Appendix A.

### 2.2 – Study Selection

Reviewer BPD screened all titles and abstracts to check eligibility using the pre-defined inclusion and exclusion criteria, and reviewers MB-B and CB independently checked a 20% random sample. Reviewer BPD checked all full-texts for eligibility using the inclusion and exclusion criteria, and reviewers MB-B, CB, TR-M also

1  
2  
3 independently checked eligibility. Disagreements regarding the inclusion of studies were resolved through  
4 discussion with DAvdW.  
5

### 6 **2.3 – Inclusion Criteria**

7  
8 To be eligible for inclusion, studies were required to have a longitudinal, prospective or retrospective,  
9 observational study design. Cohort studies were required to have a study population consisting of people  
10 without frozen shoulder at inclusion and must have established whether diabetes was present at baseline (all  
11 types of diabetes were considered). Case-control studies were required to have a study population consisting  
12 of people with frozen shoulder and a control group without frozen shoulder, with diabetes defined as the  
13 exposure of interest. The paper must have presented an odds ratio, risk ratio or hazard ratio, or they must  
14 have presented sufficient data to allow the associations to be estimated. There were no restrictions to setting;  
15 population based as well as clinical cohorts were eligible. All non-English language papers were assessed by  
16 reviewers with appropriate language skills. Cross-sectional studies and case series were excluded. Studies were  
17 also excluded if a full text could not be obtained.  
18

### 19 **2.4 – Data Extraction and Risk of Bias**

20  
21 Data extraction was completed by reviewer BPD and was independently checked by reviewers MB-B and TR-  
22 M. Types of data extracted included details of study design, setting, sample characteristics,  
23 exposure/outcome/covariate measurement, inclusion and exclusion criteria, sample size, attrition, covariate  
24 conditioning, follow-up time, statistical analysis, association estimates (odds ratio, risk ratio or hazard ratio) or  
25 raw data to estimate association sizes if they were not already presented. Risk of bias was independently  
26 assessed by pairs of reviewers (BPD, MB-B, TR-M). Risk of bias was judged using the Quality In Prognosis  
27 Studies (QUIPS) tool [23]. The QUIPS tool covers six domains: (1) study participation, (2) study attrition, (3)  
28 prognostic/risk factor measurement, (4) outcome measurement, (5) study confounding, (6) statistical analysis  
29 and reporting. Each of the six domains is scored as being at a low, medium, or high risk of bias [23]. Domain  
30 scores were used to guide judgement of the overall risk of bias (scored as low, medium or high) for the study.  
31 Overall risk of bias was based on author judgement and the use of a tallied or summated score was avoided.  
32 All disagreements regarding data extraction and assessment of risk of bias were resolved by discussion.  
33  
34

### 35 **2.5 – Data Analysis**

36  
37 Case-control studies and cohort studies were analysed separately. Narrative synthesis was used where less  
38 than five studies were present and a random-effects meta-analysis model was used to calculate a summary  
39 estimate when five or more studies were present. Cohort study associations were measured using hazard  
40 ratios and case-control study associations were estimated using odds ratios. Where adjusted and crude  
41 estimates were both presented, the adjusted estimate was used. Where a zero-cell count was present within  
42 the results of a study, a continuity correction of 0.5 was added to all cells for that study. Restricted maximum  
43 likelihood estimation [24] was used to estimate the between-study variance,  $\tau^2$ , and the Hartung-Knapp-Sidik-  
44 Jonkman variance correction method [25] was used in the estimation of the pooled effect confidence interval.  
45 Heterogeneity was assessed using Cochran's Q statistic, complemented by the  $I^2$  index [26]. Prediction  
46 intervals were not estimated since they are inaccurate when there is little heterogeneity ( $I^2 < 0.3$ ), or an  
47 imbalance in study sizes exists, both of which were found in the meta-analysis in this review (see Section 3)  
48 [27]. A forest plot was used to visualise results of individual results and of the pooled estimate. Evidence of  
49 small-study bias was assessed with a funnel plot of log odds ratios against their standard errors [28]. A test for  
50 funnel plot asymmetry was not used since the meta-analysis included less than ten studies [29]. The influence  
51 of each study on the overall pooled estimate was assessed by repeating the meta-analysis, each time leaving  
52 out a single study [30]. Statistical analysis was carried out using Stata version 16.1 [31].  
53  
54  
55

### 56 **2.6 - Patient and Public Involvement**

57  
58 No patient involved.  
59  
60

### 3 - Results

The searches identified 1784 unique citations, 12 of which were selected for full-text screening, and eight studies consisting of a total of 346,278 people fulfilled the inclusion criteria (Figure 1). Table 1 summarises information on risk of bias, study design, setting, participants, sample size, and methods used for diagnosing diabetes and frozen shoulder. Of the eight studies that met the criteria for inclusion, six [32-37] had case-control designs and two [38,39] had cohort designs. Three studies [37-39] (including the two cohort studies)

**Table 1.** Characteristics of studies on diabetes as a risk factor for frozen shoulder

| Source                                | Risk of Bias (QUIPS, overall assessment) | Design and Setting                                                      | % Female                                     | Mean Age (years)                    | Sample Size               | Method to diagnose diabetes and frozen shoulder                                                                                                          | Variables conditioned on                                                          |
|---------------------------------------|------------------------------------------|-------------------------------------------------------------------------|----------------------------------------------|-------------------------------------|---------------------------|----------------------------------------------------------------------------------------------------------------------------------------------------------|-----------------------------------------------------------------------------------|
| <b>Case-control studies</b>           |                                          |                                                                         |                                              |                                     |                           |                                                                                                                                                          |                                                                                   |
| K. L. Boyle-Walker, et al., 1997 [32] | High                                     | Sex-Matched Case-Control at Physical Therapy Clinic in the USA          | Case Group: 75%, Control Group: 68%          | Not reported                        | Cases: 32, Controls: 31   | Diabetes: Self-reported Questionnaire<br>Frozen shoulder: Clinically diagnosed                                                                           | Sex-matched                                                                       |
| W. Li, et al., 2014 [33]              | High                                     | Hospital based case-control matched on time of hospitalisation in China | Case Group: 63%, Control Group: 55%          | Cases: 57.2, Controls: 45.9         | Cases: 182, Controls: 196 | Diabetes: Face-to-face interview<br>Frozen shoulder: Clinically diagnosed                                                                                | Matched on time of hospitalisation, adjusted for history of minor shoulder trauma |
| S-Y. Lee, et al., 2012 [34]           | High                                     | Hospital based age- and sex-matched case-control in South Korea         | Case Group: 55%, Control Group: not reported | Cases: 52.8, Controls: not reported | Cases: 40, Controls: 40   | Diabetes: Unclear<br>Frozen shoulder: Clinically diagnosed                                                                                               | Age- and sex-matched                                                              |
| C. Milgrom, et al., 2008 [35]         | High                                     | Hospital based age-matched case-control in Israel                       | Case Group: 60%, Control Group: 65%          | Cases: 54.9, Controls: 55.4         | Cases: 126, Controls: 98  | Diabetes: If patient was receiving drug treatment for Diabetes or whose serum glucose was higher than 200 mg/dl<br>Frozen shoulder: Clinically diagnosed | Age-matched                                                                       |
| K. Wang, et al.,                      | High                                     | Hospital based age- and sex-matched                                     | Case Group:                                  | Cases: 56, Controls:                | Cases: 87, Controls:      | Diabetes: Self-reported                                                                                                                                  | Age- and sex-matched                                                              |

collected information from electronic health records, four studies [33-36] were hospital-based, and one study [32] was based in a physical therapy clinic. Among the case-control studies, the percentage of female cases ranged from 52% to 75% and the mean age for cases ranged from 52.8 years to 57.2 years.

|                                |          |                                                                                             |                                            |                                              |                                                   |                                                     |                                                                                                                                        |
|--------------------------------|----------|---------------------------------------------------------------------------------------------|--------------------------------------------|----------------------------------------------|---------------------------------------------------|-----------------------------------------------------|----------------------------------------------------------------------------------------------------------------------------------------|
| 2013 [36]                      |          | case-control in Australia                                                                   | 64%, Control Group: 58%                    | 55.3                                         | 176                                               | Frozen shoulder: Clinically diagnosed               |                                                                                                                                        |
| K. Kingston, et al., 2018 [37] | High     | Sex-matched case-control using electronic health records in the USA                         | Case Group: 58%, Control Group: 58%        | Cases: 56.4, Controls: Not Reported          | Cases: 2190, Controls: 2190                       | Diabetes: ICD-9 Code<br>Frozen shoulder: ICD-9 Code | Sex-matched                                                                                                                            |
| <b>Cohort studies</b>          |          |                                                                                             |                                            |                                              |                                                   |                                                     |                                                                                                                                        |
| Y-P. Huang, et al., 2013 [38]  | High     | Age- and sex-matched cohort with 3-year follow-up using electronic health records in Taiwan | Exposed Group: 47%, Non-Exposed Group: 47% | Exposed Group: 55.7, Non-Exposed Group: 55.5 | Exposed Group: 78,827, Non-Exposed Group: 236,481 | Diabetes: ICD-9 Code<br>Frozen shoulder: ICD-9 Code | Age- and sex-matched. Multivariable analysis adjusted for age, sex, dyslipidaemia                                                      |
| S-F. Lo, et al., 2013 [39]     | Moderate | Cohort with 8-year follow-up using electronic health records in Taiwan                      | Exposed Group: 52%, Non-Exposed Group: 51% | Not reported                                 | Exposed Group: 5109, Non-Exposed Group: 20,473    | Diabetes: ICD-9 Code<br>Frozen shoulder: ICD-9 Code | Multivariable analysis adjusted for age, income, stroke, hypertension, hyperlipidaemia, obesity, chronic obstructive pulmonary disease |

Presence of diabetes was identified using ICD-9 codes (codes to classify diseases, symptoms, clinical findings and causes of disease and injury) from electronic health records in three studies [37-39], self-reported in three studies [32,33,36], identified with a glucose test or if the patient was receiving drug treatment for diabetes in one study [35], and was unclear in one study [34]. Frozen shoulder was identified using [37-39] ICD-9 codes in three studies and was diagnosed clinically in five studies [32-36]. Only one study [39] reported the types of diabetes that the participants had. Lo et al. [39] stated that 296 (5.8%) of the 5109 people with diabetes in their study had type 1 diabetes. Two studies were conducted in Taiwan [38,39], two in the USA [32,37] and the remaining four were conducted in China [33], South Korea [34], Israel [35] and Australia [36].

Overall QUIPS risk of bias scores for each study can be found in Table 1 and full QUIPS assessments can be found in Table 2. Overall, there was a 75% agreement between reviewers across the individual bias domains, and reviewers agreed on 4 of the 8 overall risk of bias scores. One of the cohort studies [39] was scored as being at a moderate risk of bias for their overall study rating and the other seven studies were rated as being at a high risk of bias overall. A bar graph of the scores for individual risk of bias domains can be found in Appendix Figure B1. Risk of bias was generally high across most domains, but especially so for the risk of unaccounted confounding, which was scored as being at a high risk of bias in all eight studies. Five of the case-control studies [32,34-37] only accounted for age, gender or a combination of the two. One study [33] matched on the time of hospitalisation and adjusted for history of minor shoulder trauma. One cohort study [38] adjusted for age, sex and dyslipidaemia; the other cohort study [39] adjusted for age, income, stroke, hypertension, hyperlipidaemia, obesity and chronic obstructive pulmonary disease.

**Table 2** QUIPS domain scores for each primary study

| Source                                | Participation | Study Attrition | Risk Factor Measurement | Outcome Measurement | Confounding | Statistical Analysis and Presentation | Overall Risk of Bias |
|---------------------------------------|---------------|-----------------|-------------------------|---------------------|-------------|---------------------------------------|----------------------|
| <b>Case-Control Studies</b>           |               |                 |                         |                     |             |                                       |                      |
| K. L. Boyle-Walker, et al., 1997 [32] | High          | Moderate        | High                    | Moderate            | High        | Moderate                              | High                 |
| W. Li, et al., 2014 [33]              | Moderate      | Low             | Moderate                | High                | High        | High                                  | High                 |
| S-Y. Lee, et al., 2012 [34]           | Moderate      | Low             | Moderate                | Moderate            | High        | Moderate                              | High                 |
| C. Milgrom, et al., 2008 [35]         | Moderate      | Low             | Low                     | Low                 | High        | Low                                   | High                 |
| K. Wang, et al., 2013 [36]            | Low           | Low             | Low                     | Low                 | High        | Low                                   | High                 |
| K. Kingston, et al., 2018 [37]        | Low           | Moderate        | Moderate                | Low                 | High        | Moderate                              | High                 |
| <b>Cohort studies</b>                 |               |                 |                         |                     |             |                                       |                      |
| Y-P. Huang, et al., 2013 [38]         | Low           | Moderate        | Low                     | High                | High        | High                                  | High                 |
| S-F. Lo, et al., 2013 [39]            | Low           | Low             | Low                     | Moderate            | High        | Low                                   | Moderate             |

Six case-control studies including a total of 5388 people were pooled in a random-effects meta-analysis, with a pooled odds ratio of 3.69 (95% CI: 2.99, 4.56) (Figure 2). The raw data extracted from each study that was used to calculate odds ratios can be found in Appendix Table C1. The estimated between-study variance was small ( $\tau^2 < 0.01$ , 95% CI:  $< 0.01$ , 0.23) and little heterogeneity was detected ( $Q = 2.07$ ,  $df = 5$ ,  $p = 0.84$ ;  $I^2 < 0.01\%$  (95% CI:  $< 0.1\%$ , 67.6%)), but the estimate for  $I^2$  was imprecise as indicated by the wide 95% confidence interval. The influence analysis showed that excluding the largest study [37], which contained 4380 of the 5388 participants, greatly reduced the precision of the pooled estimate but did not substantially affect the value of the pooled estimate (Figure 3). Further, excluding any other single study did not substantially affect the value of the pooled estimate (Figure 3). The two studies with the smallest standard errors for their effect estimates had the largest odds ratios, making the funnel plot appear unsymmetrical. However, due to the small number of studies contributing to the funnel plot, the asymmetrical appearance could be due to chance (Figure 4).

The two cohort studies that were identified used Cox proportional-hazards models and obtained results suggesting that people with diabetes were more at risk of developing frozen shoulder. One cohort study [38] using electronic health records from Taiwan, with a 3-year follow-up and consisting of 315,308 people reported an age-, sex- and dyslipidaemia-adjusted hazard ratio of 1.32 (95% CI: 1.22, 1.42). Another cohort study [39], with an 8-year follow-up, consisting of 25,582 people, also using electronic health records from Taiwan, estimated an age-, income-, stroke-, hypertension-, hyperlipidaemia-, obesity- and chronic obstructive pulmonary disease- adjusted hazard ratio of 1.67 (95% CI: 1.46, 1.91).

#### 4 - Discussion

This systematic review aimed to summarise evidence from longitudinal observational studies to determine whether diabetes (types 1 and 2) is a risk factor for frozen shoulder.

Eight studies met the eligibility criteria for the review; each individual study demonstrated evidence to suggest that diabetes is associated with the onset of frozen shoulder. Our meta-analysis of six case-control studies yielded a pooled odds ratio of 3.69 (95% CI: 2.99, 4.56), and the value of the pooled estimate was robust to the omission of any individual study. The odds ratio estimates of all but one study [37] were imprecise with large

1  
2  
3 confidence intervals; this meant that the confidence intervals overlapped well, resulting in a small  $I^2$  value. It is  
4 also important to note that Cochran's Q statistic should be interpreted with caution since the number of  
5 studies included in the analysis was small [40].  
6

7 The funnel plot was unsymmetrical. However, given that a small number of studies were available, it  
8 was difficult to assess accurately whether any small-study bias was present or if the appearance was due to  
9 chance. Since our influence analysis has shown that the inclusion/exclusion of any individual study had very  
10 little impact on the pooled effect estimate, any potential small-study bias would be unlikely to substantially  
11 affect the results.  
12

13 Two cohort studies were identified, both of which corroborate the evidence from the six case-control  
14 studies reported above, that people with diabetes are more likely to develop frozen shoulder than those  
15 without diabetes. Of the two cohort studies, one was deemed to be at a high risk of bias and the other at a  
16 moderate risk of bias. The hazard ratios in the two studies did differ, which could have partly been due to the  
17 differences in the covariates that were adjusted for and/or the differences in the duration of follow-up. Both  
18 studies were rated as being at a high of bias for the outcome-measurement domain as the length of follow-up  
19 (3 years [38] and 8 years [39]) was deemed too short to establish whether a patient would develop frozen  
20 shoulder in the future. Previous studies have suggested that the duration of diabetes may be associated with  
21 the risk of developing frozen shoulder [41,42], with one of the cohort studies in this review also stating that  
22 their study suggested that "the development of [frozen shoulder] is associated with the duration of diabetes"  
23 [38]. Therefore, future studies should ensure that the follow-up period is long enough to observe participants  
24 from diabetes diagnosis through to the ages for which frozen shoulder is common. A cross-sectional study of  
25 1373 patients presenting with frozen shoulder estimated that the mean age of onset for frozen shoulder was  
26 55.4 years with a standard deviation of 9.9 years [3].  
27  
28

29 The following three paragraphs describe some limitations that may complicate the understanding of  
30 the association between diabetes and the onset of frozen shoulder.  
31

32 The two cohort studies in the review were both conducted using Electronic Health Records (EHRs).  
33 EHR datasets can provide large sample sizes with long follow-up periods and detailed patient medical record  
34 history [43]. Misdiagnosis and miscoding in EHRs are common limitations and could potentially result in a risk  
35 of bias for frozen shoulder measurement [44]. Research in the UK [45] and in the Netherlands [46] has shown  
36 that general practitioners often use non-specific shoulder pain codes instead of codes for specific shoulder  
37 conditions, e.g., frozen shoulder. This would lead to an underdiagnosis of frozen shoulder. Further, this  
38 misclassification may be differential since clinicians may feel more confident in providing a specific frozen  
39 shoulder diagnosis in patients with diabetes due to the pre-existing knowledge of the association between the  
40 two conditions. Conversely, it has also been noted that frozen shoulder is sometimes used as a "waste-bin  
41 diagnosis" for patients presenting with any stiff and painful shoulder [47]. Thus, EHR data may include other  
42 shoulder conditions with similar clinical presentations being coded as frozen shoulder.  
43  
44

45 Another important limitation was the overall poor adjustment for confounding variables. All eight  
46 studies were rated as being at a high risk of unaccounted confounding. In each study, confounders were either  
47 ignored [32,34-38] or inappropriate statistical methods, such as univariable prefiltering and stepwise selection,  
48 were used [33,38,39]. These methods are especially poorly suited for aetiologic models [48]. Thus, these  
49 studies may have missed potentially important confounders [33,38,39] or erroneously adjusted for mediators,  
50 such as stroke [39].  
51

52 The systematic review is also limited by there being only two cohort studies, meaning that pooling  
53 association estimates was not possible. Cohort studies are particularly useful for gaining a better  
54 understanding of temporal associations, as this review aimed to do. Further, both cohort studies were  
55 conducted in Taiwan using existing data from EHRs. Future studies with prospective designs will help to gauge  
56 whether the findings of these two cohort studies are reproducible, and whether the results are consistent  
57 across different populations.  
58  
59  
60

1  
2  
3 Previously, a meta-analysis of cross-sectional studies established that frozen shoulder was more  
4 prevalent in people with diabetes than among people without diabetes. This systematic review provides  
5 evidence of a temporal relationship between diabetes and frozen shoulder. Understanding the temporal  
6 relationship is key to explaining why diabetes and frozen shoulder are associated, however further high-quality  
7 research with appropriate methods and study design is required to confirm the strength of the association and  
8 establish whether diabetes is indeed a cause of frozen shoulder.  
9

10 Whilst sound and reliable epidemiological evidence of a causal relationship between diabetes and  
11 frozen shoulder is currently unavailable, elsewhere in the literature, researchers have hypothesised about  
12 potential pathological mechanisms through which diabetes may lead to frozen shoulder. Current evidence,  
13 based on histological studies, suggests that a pathophysiological process consisting of chronic inflammation  
14 and capsular fibrosis leads to the contracture in frozen shoulder [49,50]. It has been hypothesised that the  
15 accumulation of advanced glycation end products (AGEs), which lead to the cross-linking of collagen [51,52],  
16 may explain the fibrosis in the capsule of frozen shoulder patients [33]. Glycation is a process by which simple  
17 sugars bond to proteins, which is enhanced by persistent hyperglycaemia. Thus, the role of glycation and AGEs  
18 in the fibrosis of the shoulder capsule could potentially be a reason why diabetes is associated with frozen  
19 shoulder. Another potential reason why diabetes may be associated with frozen shoulder is that  
20 hyperglycaemia may induce proinflammatory cytokines [53] which have been found to be elevated in the  
21 capsule and synovium of frozen shoulder patients [54].  
22  
23

24 The association between glycaemic control and the risk of developing frozen shoulder should also be  
25 a focus for future research. One study found evidence to suggest that poor long-term glycaemic control in  
26 people with diabetes is associated with an increased incidence of frozen shoulder [55], whilst another study  
27 found no association between HbA1c level in people with diabetes and the prevalence of frozen shoulder [56].  
28 Further research is required to investigate whether glycaemic control is associated with the development of  
29 frozen shoulder.  
30  
31

## 32 33 **5 - Conclusion**

34  
35 In summary, people with diabetes are more at risk of developing frozen shoulder than people without  
36 diabetes. However, existing research is limited by the high risk of unmeasured confounding. To better  
37 understand the nature of the relationship between diabetes and the onset of frozen shoulder, it is necessary  
38 to have high-quality cohort studies that use causal inference methods that are appropriate for aetiologic  
39 modelling. Given the existing evidence that has been summarised in this review, clinicians should consider  
40 checking whether patients with diabetes are experiencing shoulder pain at their routine follow-up  
41 appointments. An early diagnosis will help the clinician to provide treatment for the pain and lack of function  
42 that result from frozen shoulder.  
43  
44

## 45 46 **6 - Acknowledgements**

47  
48 This study was supported by the Versus Arthritis PhD scholarship scheme [grant number 21899]. The author  
49 would also like to thank the information specialists of evidence synthesis team at the Primary Care Centre  
50 Versus Arthritis for their advice regarding the search strategy, and Elaine Willmore for taking time to check the  
51 results of our searches for this review. Further thanks are given to Dr Linda Chesterton, who was involved in  
52 the initial conceptualisation of this study. Claire Burton is funded by an NIHR (National Institute for Health  
53 Research) Clinical Lectureship. The views expressed are those of the authors and not necessarily those of the  
54 National Health Service, the NIHR, or the Department of Health and Social Care.  
55  
56

## 57 58 **Abbreviations**

59  
60 QUIPS - Quality In Prognosis Studies

1  
2  
3 CI – Confidence interval

4  
5 Q – Cochran’s Q statistic

6  
7 df – Degrees of freedom

### 10 **Ethics Approval**

11  
12 No Ethics Committee or Institutional Board approval is required.

13  
14 No human participants included.

### 17 **Author contributions**

18  
19 All authors (BPD, CB, DvdW, MB-B and TR-M) contributed to the conception of the study and systematic  
20 review study selection. Data extraction and risk of bias assessment was performed by BPD, MB-B and TR-M.  
21 BPD performed the meta-analysis and narrative synthesis of the results and drafted the initial manuscript. All  
22 authors (BPD, CB, DvdW, MB-B and TR-M) contributed to editing and approval of the final manuscript.  
23  
24

### 26 **Funding**

27  
28 This work was supported by Versus Arthritis grant number 21899. Claire Burton is funded by an NIHR (National  
29 Institute for Health Research) Clinical Lectureship. The views expressed are those of the authors and not  
30 necessarily those of the National Health Service, the NIHR, or the Department of Health and Social Care.  
31  
32

### 33 **Data availability**

34  
35 Data have been included in Table 1 and Appendix Table C.1.  
36  
37

### 39 **Conflicts of interest statement**

40  
41 The authors have no conflicts of interest.  
42  
43

### 44 **Supplementary Material**

45  
46 Appendix A contains the search strategy for MEDLINE.

47  
48 Appendix B contains full QUIPS risk of bias assessments for each primary study and a bar graph of QUIPS scores  
49 for each of the six bias domains.

50  
51 Appendix C contains the raw data extracted from each primary study that was used to calculate the odds ratios  
52 included in the meta-analysis.  
53  
54

### 55 **References**

56  
57 [1] Bunker T. Frozen Shoulder. *Orthopaedics and Trauma*. 2011; 25(1):11-8.  
58 <https://doi.org/10.1016/j.mporth.2011.01.007>  
59  
60



- 1  
2  
3 [2] Dias R, Cutts S, Massoud S. Frozen shoulder. *BMJ*. 2005; 331:1453-6.  
4 <https://doi.org/10.1136/bmj.331.7530.1453>  
5
- 6 [3] Cho C-H, Koo TW, Cho N-S, Park K-J, Lee BG, Shin D, Choi S, Cho S-H, Kim M-S, Ko S-H, Kim C-H, Park J-Y, Yoo  
7 Y-S. Demographic and Clinical Characteristics of Primary Frozen Shoulder in a Korean Population. *Clin Shoulder*  
8 *Elbow*. 2015; 18(3):133-7. doi: 10.5397/cise.2015.18.3.133  
9
- 10 [4] Rizk TE, Pinals RS. Frozen shoulder. *Seminars in Arthritis and Rheumatism*. 1982; 11(4):440-52. doi:  
11 10.1016/0049-0172(82)90030-0  
12
- 13 [5] Cohen C, Tortato T, Silva OBS, Ferreira Leal M, Ejnisman B, Faloppa F. Association between frozen shoulder  
14 and thyroid diseases: strengthening the evidences. *Rev Bras Ortop*. 2020; 55(4):483–9. doi: 10.1055/s-0039-  
15 3402476  
16
- 17 [6] Huang S-W, Lin J-W, Wang W-T, Wu C-W, Liou T-H, Lin H-W. Hyperthyroidism is a risk factor for developing  
18 adhesive capsulitis of the shoulder: a nationwide longitudinal population-based study. *Sci Rep*. 2014;  
19 25(4):4183. doi: 10.1038/srep04183  
20
- 21 [7] Cucchi D, Marmotti A, De Giorgi S, Costa A, D’Apolito R, Conca M, Russo A, Saccomanno MF, de Girolamo L.  
22 Risk Factors for Shoulder Stiffness: Current Concept. *Joints*. 2017; 5(4):217-23. doi: 10.1055/s-0037-1608951  
23
- 24 [8] Nagy MT, MacFarlane RJ, Khan Y, Waseem M. The frozen shoulder: myths and realities. *Open Orthop J*,  
25 2013; 7:352-355. doi: 10.2174/1874325001307010352  
26
- 27 [9] Sung CM, Sung TS, Park HB. Are serum lipids involved in primary frozen shoulder? A case-control study. *J*  
28 *Bone Joint Surg*. 2014; 96(21):1828–33. doi: 10.2106/JBJS.M.00936  
29
- 30 [10] Nayak SP, Panda CK. Is hyperlipidaemia a cause of primary frozen shoulder? A case-controlled study. *J*  
31 *Evid based med. healthc*. 2017; 4(13):697-710. doi 10.18410/jebmh/2017/135  
32
- 33 [11] Austin D, Gans I, Park M, Carey J, Kelly J. The association of metabolic syndrome markers with adhesive  
34 capsulitis. *J Shoulder and Elbow Surg*. 2014; 23(7):1043-51. doi: 10.1016/j.jse.2013.11.004  
35
- 36 [12] Smith SP, Devaraj VS, Bunker TD. The association between frozen shoulder and Dupuytren's disease. *J*  
37 *Shoulder Elbow Surg*. 2001; 10(2):149-51. doi: 10.1067/mse.2001.112883.  
38
- 39 [13] Bunker TD, Anthony PP. The pathology of frozen shoulder. A Dupuytren-like disease. *J Bone Joint Surg Br*.  
40 1995; 77(5):677-83. PMID: 7559688.  
41
- 42 [14] Zreik NH, Malik RA, Charalambos CP. Adhesive capsulitis of the shoulder and diabetes: a meta-analysis of  
43 prevalence. *MLTJ*. 2016; 6(1):26-34. doi: 10.11138/mltj/2016.6.1.026  
44
- 45 [15] NHS Digital. *National Diabetes Audit 2017/18 - Report 1 Care Processes and Treatment Targets*. 2020.  
46 Accessed: 8th September 2022 [https://digital.nhs.uk/data-and-information/publications/statistical/national-](https://digital.nhs.uk/data-and-information/publications/statistical/national-diabetes-audit/report-1-care-processes-and-treatment-targets-2017-18-short-report)  
47 [diabetes-audit/report-1-care-processes-and-treatment-targets-2017-18-short-report](https://digital.nhs.uk/data-and-information/publications/statistical/national-diabetes-audit/report-1-care-processes-and-treatment-targets-2017-18-short-report)  
48
- 49 [16] Fowler MJ. Microvascular and Macrovascular Complications of Diabetes. *Clin Diabetes*. 2008; 26(2):77–82.  
50 <https://doi.org/10.2337/diaclin.26.2.77>  
51
- 52 [17] Sözen T, Başaran NC, Tınazlı M, Özışık L. Musculoskeletal problems in diabetes mellitus. *Eur J Rheumatol*,  
53 2018; 5(4):258–65. doi: 10.5152/eurjrheum.2018.18044  
54
- 55 [18] Dyer BP, Burton C, Rathod-Mistry T, Blagojevic-Bucknall M, van der Windt DA. Diabetes as a prognostic  
56 factor in frozen shoulder: a systematic review. *Arch Rehabil Res Clin Transl*. 2021; 3:100141.  
57 <https://doi.org/10.1016/j.arrct.2021.100141>  
58
- 59 [19] Hsu C-L, Sheu WH-H. Diabetes and shoulder disorders. *J Diabetes Investig*. 2016; 7(5):649-51.  
60 <https://doi.org/10.1111/jdi.12491>

- 1  
2  
3 [20] Pietrzak M, Adhesive capsulitis: An age-related symptom of metabolic syndrome and chronic low-grade  
4 inflammation? *Med Hypotheses*. 2016; 88:12-7. doi: 10.1016/j.mehy.2016.01.002.  
5
- 6 [21] Rothman KJ, Greenland S, Lash TL. *Modern Epidemiology*: 3rd ed. Lippincott Williams & Wilkins. 2013.  
7
- 8 [22] Moher D, Liberati A, Tetzlaff J, Altman DG. Preferred reporting items for systematic reviews and meta-  
9 analyses: the PRISMA statement. *BMJ*. 2009; 339:b2535. doi: 10.1136/bmj.b2535  
10
- 11 [23] Hayden JA, van der Windt DA, Cartwright JL, Côté P, Bombardier C. Assessing bias in studies of prognostic  
12 factors. *Ann Intern Med*. 2019; 158(4):280–6. doi: 10.7326/0003-4819-158-4-201302190-00009  
13
- 14 [24] Veroniki AA, Jackson D, Viechtbauer W, Bender R, Bowden J, Knapp G, Kuss O, Higgins JPT, Langan D,  
15 Salanti G. Methods to estimate the between-study variance and its uncertainty in meta-analysis. *Res Synth*  
16 *Meth*. 2016; 7(1):55-79. doi: 10.1002/jrsm.1164  
17
- 18 [25] IntHout J, Ioannidis JPA, Borm GF. The Hartung-Knapp-Sidik-Jonkman method for random-effects meta-  
19 analysis is straightforward and considerably outperforms the standard Der-Simonian-Laird method. *BMC Med*  
20 *Res Methodol*. 2014; 14:25. <https://doi.org/10.1186/1471-2288-14-25>  
21
- 22 [26] Higgins JPT, Thompson SG, Deeks JJ, Altman DG. Measuring inconsistency in meta-analyses. *BMJ*. 2003;  
23 327:557-60. <https://doi.org/10.1136/bmj.327.7414.557>  
24
- 25 [27] Partlett C, Riley RD. Random effects meta-analysis: Coverage performance of 95% confidence and  
26 prediction intervals following REML estimation. *Statist. Med*. 2016; 36(2):301-17.  
27 <https://doi.org/10.1002/sim.7140>  
28
- 29 [28] Sterne JAC, Harbord RM. Funnel Plots in Meta-analysis. *Stata Journal*. 2004; 4(2):127-41.  
30 <https://doi.org/10.1177/1536867X0400400204>  
31
- 32 [29] Higgins JPT, Green S. *Cochrane Handbook for Systematic Reviews of Interventions* Version 5.1.0 [updated  
33 March 2011]. *The Cochrane Collaboration*. 2011.  
34
- 35 [30] Viechtbauer W, Cheung MWL. Outlier and influence diagnostics for meta-analysis. *Res Syn Meth*. 2010;  
36 1(2):112-25. doi: 10.1002/jrsm.11  
37
- 38 [31] StataCorp. 2019. *Stata Statistical Software: Release 16*. College Station, TX: StataCorp LLC.  
39
- 40 [32] Boyle-Walker KL, Gabard DL, Bietsch E, Masek-VanArsdale DM, Robinson BL. A profile of patients with  
41 adhesive capsulitis. *J Hand Ther*. 1997; 10(3):222-8. [https://doi.org/10.1016/S0894-1130\(97\)80025-7](https://doi.org/10.1016/S0894-1130(97)80025-7)  
42
- 43 [33] Li W, Lu N, Xu H, Wang H, Huang J. Case control study of risk factors for frozen shoulder in China. *Int J*  
44 *Rheum Dis*. 2014; 18(5):508-13. <https://doi.org/10.1111/1756-185X.12246>  
45
- 46 [34] Lee S-Y, Park J, Song S-W. Correlation of MR Arthrographic Findings and Range of Shoulder Motions in  
47 Patients With Frozen Shoulder. *American Journal of Roentgenology*. 2012; 198(1):173-9. doi:  
48 10.2214/AJR.10.6173  
49
- 50 [35] Milgrom C, Novack V, Weil Y, Jaber S, Radeva-Petrova DR, Finestone A. Risk factors for idiopathic frozen  
51 shoulder. *Isr Med Assoc J*. 2008; 10(5):361-4. PMID: 18605360  
52
- 53 [36] Wang K, Ho V, Hunter-Smith DJ, Beh PS, Smith KM, Weber AB. Risk factors in idiopathic adhesive  
54 capsulitis: a case control study. *J Shoulder Elbow Surg*. 2013; 22(7):24-9. doi: 10.11138/mltj/2016.6.1.026  
55
- 56 [37] Kingston K, Curry EJ, Galvin JW, Li X. Shoulder adhesive capsulitis: epidemiology and predictors of surgery.  
57 *J Shoulder Elbow Surg*. 2018; 27(8):1437-43. doi: 10.1016/j.jse.2018.04.004  
58
- 59 [38] Huang Y-P, Fann C-Y, Chiu Y-H, Yen M-F, Chen L-S, Chen H-H, Pan S-L. Association of Diabetes Mellitus  
60 With the Risk of Developing Adhesive Capsulitis of the Shoulder: A Longitudinal Population-Based Follow up  
Study. *Arthritis Care & Research*. 2013; 65(7):1197-202. <https://doi.org/10.1002/acr.21938>

- 1  
2  
3 [39] Lo S-F, Chu S-W, Muo C-H, Meng N-H, Chou L-W, Huang W-C, Huang C-M, Sung F-C. Diabetes mellitus and  
4 accompanying hyperlipidemia are independent risk factors for adhesive capsulitis: a nationwide population-  
5 based cohort study. *Rheumatology International*. 2014; 34:67-74. doi: 10.1007/s00296-013-2847-4  
6
- 7 [40] Hardy RJ, Thompson SG. Detecting and describing heterogeneity in meta-analysis. *Stat Med*. 1998;  
8 17(8):841-56. doi: 10.1002/(sici)1097-0258(19980430)17:8<841::aid-sim781>3.0.co;2-d  
9
- 10 [41] Thomas SJ, McDougall C, Brown IDM, Jaberoo M-C, Stearns A, Ashraf R, Fisher M, Kelly IG. Prevalence of  
11 symptoms and signs of shoulder problems in people with diabetes mellitus. *J Shoulder and Elbow Surg*. 16(6);  
12 748-51. doi: 10.1016/j.jse.2007.02.133  
13
- 14 [42] Bridgeman JF, Periarthritis of the shoulder and diabetes mellitus. *Ann Rheum Dis*. 31: 69-71; 1972. doi:  
15 10.1136/ard.31.1.69  
16
- 17 [43] Herrett E, Gallagher AM, Bhaskaran K, Forbes H, Mathur R, van Staa T, Smeeth L. Data Resource Profile:  
18 Clinical Practice Research Datalink (CPRD). *Int J Epidemiol*. 2015; 44(3):827-36. doi: 10.1093/ije/dyv098.  
19
- 20 [44] Young JC, Conover MM, Jonsson Funk M. Measurement error and misclassification in electronic medical  
21 records: methods to mitigate bias. *Curr Epidemiol Rep*. 2018; 5(4): 343–356. doi: 10.1007/s40471-018-0164-x  
22
- 23 [45] Linsell L, Dawson J, Zondervan K, Rose P, Randall T, Fitzpatrick R, Carr A. Prevalence and incidence of  
24 adults consulting for shoulder conditions in UK primary care; patterns of diagnosis and referral. *Rheumat* 2006;  
25 45(2):215-21.  
26
- 27 [46] Dorrestijn O, Greving K. Patients with shoulder complaints in general practice: consumption of medical  
28 care. *Rheumatol*. 2011; 50(2): 389-95.  
29
- 30 [47] Bunker T Time for a new name for frozen shoulder – contracture of the shoulder. *Shoulder Elbow*. 2009;  
31 1(1):4-9. <https://doi.org/10.1111/j.1758-5740.2009.00007.x>  
32
- 33 [48] Heinze G, Dunkler D. Five myths about variable selection. *Transplant International*. 2017; 30(1):6-10.  
34 <https://doi.org/10.1111/tri.12895>  
35
- 36 [49] Wong PL, Tan HC. A Review on Frozen Shoulder. *Singapore Med J*. 2010; 51(9):694-7. PMID: 20938608  
37
- 38 [50] Cho C-H, Song K-S, Kim B-S, Kim D.H, Lho Y-M. Biological Aspect of Pathophysiology for Frozen Shoulder.  
39 *BioMed Research International*. 2018; Article ID 7274517. <https://doi.org/10.1155/2018/7274517>  
40
- 41 [51] Hwang KR, Murrell GAC, Millar NL, Bonar F, Lam R, Walton JR. Advanced glycation end products in  
42 idiopathic frozen shoulders. *J Shoulder and Elbow Surg*. 2016; 25(6): 981-8. doi: 10.1016/j.jse.2015.10.015  
43
- 44 [52] Goldin A, Beckman JA, Schmidt AM, Creager MA. Advanced Glycation End Products. *Circulation*. 2006;  
45 114(6): 597-605. doi: 10.1161/CIRCULATIONAHA.106.621854.  
46
- 47 [53] Shanmugam N, Reddy MA, Guha M, Natarajan R. High glucose-induced expression of proinflammatory  
48 cytokine and chemokine genes in monocytic cells. *Diabetes*. 2003; 52(5):1256-64. doi:  
49 10.2337/diabetes.52.5.1256  
50
- 51 [54] Lho Y-M, Ha E, Cho C-H, Song K-S, Min B-W, Bae K-C, Lee K-J, Hwang I, Park H-B. Inflammatory cytokines  
52 are overexpressed in the subacromial bursa of frozen shoulder. *J Shoulder and Elbow Surg*. 2013; 22(5): 666-  
53 72. <https://doi.org/10.1016/j.jse.2012.06.014>  
54
- 55 [55] Chan JH, Ho BS, Alvi HM, Saltzman MD, Marra G. The relationship between the incidence of adhesive  
56 capsulitis and hemoglobin A1c. *J Shoulder and Elbow Surg*. 2017; 26(10):1834-7.  
57 <https://doi.org/10.1016/j.jse.2017.03.015>  
58
- 59 [56] Yian EH, Contreras R, Sodl JF. Effects of Glycemic Control on Prevalence of Diabetic Frozen Shoulder. *J*  
60 *Bone Joint Surg*. 2012; 94(10):919-23. doi: 10.2106/JBJS.J.01930

### Figure Captions

**Fig. 1** PRISMA flow diagram summarising record identification and study selection.

**Fig. 2** Random effects meta-analysis of the association between diabetes and the odds of developing frozen shoulder.

**Fig. 3** Influence plot showing the result of repeating the original meta-analysis (Figure 2), each time with a different primary study removed.

**Fig. 4** Funnel plot of log odds ratios for developing frozen shoulder in people with diabetes vs. those without diabetes.

PRISMA 2020 flow diagram for new systematic reviews which included searches of databases, registers, and other sources

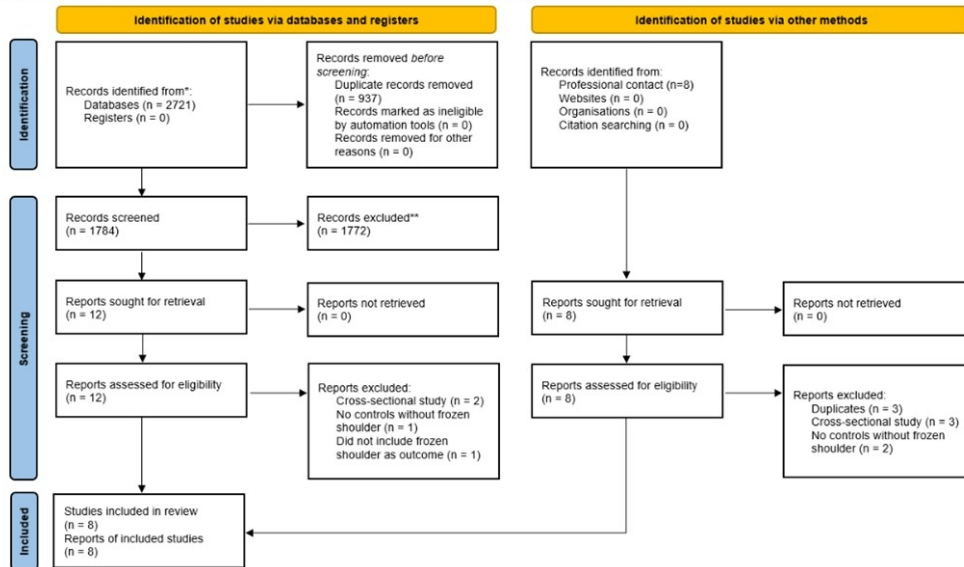

PRISMA flow diagram summarising record identification and study selection.

175x104mm (150 x 150 DPI)

1  
2  
3  
4  
5  
6  
7  
8  
9  
10  
11  
12  
13  
14  
15  
16  
17  
18  
19  
20  
21  
22  
23  
24  
25  
26  
27  
28  
29  
30  
31  
32  
33  
34  
35  
36  
37  
38  
39  
40  
41  
42  
43  
44  
45  
46  
47  
48  
49  
50  
51  
52  
53  
54  
55  
56  
57  
58  
59  
60

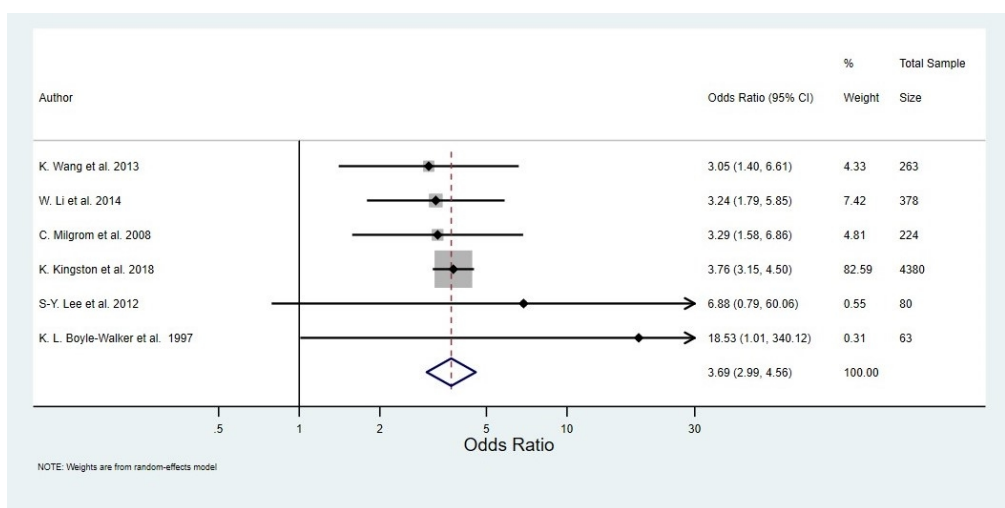

Random effects meta-analysis of the association between diabetes and the odds of developing frozen shoulder.

277x138mm (96 x 96 DPI)

1  
2  
3  
4  
5  
6  
7  
8  
9  
10  
11  
12  
13  
14  
15  
16  
17  
18  
19  
20  
21  
22  
23  
24  
25  
26  
27  
28  
29  
30  
31  
32  
33  
34  
35  
36  
37  
38  
39  
40  
41  
42  
43  
44  
45  
46  
47  
48  
49  
50  
51  
52  
53  
54  
55  
56  
57  
58  
59  
60



Influence plot showing the result of repeating the original meta-analysis (Figure 2), each time with a different primary study removed.

275x113mm (96 x 96 DPI)

1  
2  
3  
4  
5  
6  
7  
8  
9  
10  
11  
12  
13  
14  
15  
16  
17  
18  
19  
20  
21  
22  
23  
24  
25  
26  
27  
28  
29  
30  
31  
32  
33  
34  
35  
36  
37  
38  
39  
40  
41  
42  
43  
44  
45  
46  
47  
48  
49  
50  
51  
52  
53  
54  
55  
56  
57  
58  
59  
60



Funnel plot of log odds ratios for developing frozen shoulder in people with diabetes vs. those without diabetes.

109x79mm (220 x 220 DPI)



## Appendix A

The following searches were originally conducted in December 2018 and updated in June 2021.

### MEDLINE

Interface: OVID.

1. ((shoulder\* or glenohumer\* or subacromi\* or acromi\* or rotator cuff) adj3 (instability or bursitis or frozen or impinge\* or tendonitis or tendinitis or pain\* or osteoarthr\* or periarthriti\* or peri arthriti\* or arthralgia)).ti,ab,kw.

2. Shoulder Impingement Syndrome/

3. exp Bursitis/

4. Rotator Cuff/

5. adhesive capsuliti\*.ti,ab,kw.

6. Shoulder Pain/

7. or/1-6

8. exp Pain/

9. pain\*.ti,ab,kw.

10. Arthralgia/

11. arthralgia.ti,ab,kw.

12. or/8-11

13. Shoulder/

14. Shoulder joint/

15. Acromioclavicular Joint/

16. (shoulder\* or glenohumer\* or subacromi\* or acromi\* or rotator cuff).ti,ab,kw.

17. or/13-16

18. 12 and 17

19. 7 or 18

20. exp Diabetes Mellitus/

21. diabet\*.ti,ab,kw.

22. (DMi or DM i).ti,ab,kw.

23. (DM1 or DM 1).ti,ab,kw.

24. (DM2 or DM 2).ti,ab,kw.

25. (DMii or DM ii).ti,ab,kw.

26. (DM adj2 type).ti,ab,kw.

27. or/20-26

1  
2  
3 28. 19 and 27

4 29. exp animals/ not humans/  
5

6 30. 28 not 29  
7  
8

9 **EMBASE**

10 Interface: OVID.

11  
12 1. ((shoulder\* or glenohumer\* or subacromi\* or acromi\* or rotator cuff) adj3 (instability  
13 or bursitis or frozen or impinge\* or tendonitis or tendinitis or pain\* or osteoarthr\* or  
14 periarthriti\* or peri arthriti\* or arthralgia)).ti,ab,kw.  
15

16  
17 2. exp shoulder impingement syndrome/  
18

19 3. exp bursitis/  
20

21 4. exp rotator cuff/  
22

23 5. exp humeroscapular periarthritis/  
24

25 6. adhesive capsuliti\*.ti,ab,kw.  
26

27 7. exp shoulder pain/  
28

29 8. or/1-7  
30

31 9. exp pain/  
32

33 10. pain\*.ti,ab,kw.  
34

35 11. exp arthralgia/  
36

37 12. arthralgia.ti,ab,kw.  
38

39 13. or/9-12  
40

41 14. exp shoulder/  
42

43 15. Acromioclavicular Joint/  
44

45 16. (shoulder\* or glenohumer\* or subacromi\* or acromi\* or rotator cuff).ti,ab,kw.  
46

47 17. or/14-16  
48

49 18. 13 and 17  
50

51 19. 8 or 18  
52

53 20. exp Diabetes Mellitus/  
54

55 21. diabet\*.ti,ab,kw.  
56

57 22. (DMi or DM i).ti,ab,kw.  
58

59 23. (DM1 or DM1).ti,ab,kw.  
60

24. (DM2 or DM 2).ti,ab,kw.

25. (DMii or DM ii).ti,ab,kw.

1  
2  
3 26. (DM adj2 type).ti,ab,kw.

4 27. or/20-26

5 28. 19 and 27

6 29. exp animals/ not humans/

7 30. 28 not 29

8 31. limit 30 to embase

9  
10  
11  
12  
13  
14 **AMED**

15 Interface: OVID.

16  
17 1. ((shoulder\* or glenohumer\* or subacromi\* or acromi\* or rotator cuff) adj3 (instability  
18 or bursitis or frozen or impinge\* or tendonitis or tendinitis or pain\* or osteoarthr\* or  
19 periarthriti\* or peri arthriti\* or arthralgia)).ti,ab.

20 2. exp Shoulder impingement syndrome/

21 3. exp Bursitis/

22 4. exp Rotator cuff/

23 5. adhesive capsuliti\*.ti,ab.

24 6. exp shoulder pain/

25 7. or/1-6

26 8. exp Pain/

27 9. pain\*.ti,ab.

28 10. exp Arthralgia/

29 11. arthralgia.ti,ab.

30 12. or/8-11

31 13. shoulder/

32 14. (shoulder\* or glenohumer\* or subacromi\* or acromi\* or rotator cuff).ti,ab.

33 15. or/13-14

34 16. 12 and 15

35 17. 7 or 16

36 18. exp Diabetes mellitus/

37 19. diabet\*.ti,ab.

38 20. (DMi or DM i).ti,ab.

39 21. (DM1 or DM 1).ti,ab.

40 22. (DM2 or DM 2).ti,ab.

1  
2  
3 23. (DMii or DM ii).ti,ab.

4 24. (DM adj2 type).ti,ab.

5  
6 25. or/18-24

7  
8 26. 17 and 25

9 27. exp animals/ not humans/

10  
11 28. 26 not 27

12  
13  
14 **PsycINFO**

15 Interface: OVID.

16  
17 1. ((shoulder\* or glenohumer\* or subacromi\* or acromi\* or rotator cuff) adj3 (instability  
18 or bursitis or frozen or impinge\* or tendonitis or tendinitis or pain\* or osteoarthr\* or  
19 periarthriti\* or peri arthriti\* or arthralgia)).ti,ab.

20  
21 2. Shoulder Impingement Syndrome.ti,ab.

22  
23 3. bursitis.ti,ab.

24  
25 4. rotator cuff.ti,ab.

26  
27 5. adhesive capsuliti\*.ti,ab.

28  
29 6. shoulder pain.ti,ab.

30  
31 7. or/1-6

32  
33 8. exp PAIN/

34  
35 9. pain\*.ti,ab.

36  
37 10. arthralgia.ti,ab.

38  
39 11. or/8-10

40  
41 12. \*"shoulder (anatomy)"/

42  
43 13. shoulder\*.ti,ab.

44  
45 14. shoulder joint.ti,ab.

46  
47 15. acromi\*.ti,ab.

48  
49 16. glenohumer\*.ti,ab.

50  
51 17. subacromi\*.ti,ab.

52  
53 18. or/12-17

54  
55 19. 11 and 18

56  
57 20. 7 or 19

58  
59 21. exp DIABETES MELLITUS/

60 22. diabet\*.ti,ab.

- 1  
2  
3 23. (DMi or DM i).ti,ab.  
4 24. (DM1 or DM 1).ti,ab.  
5  
6 25. (DM2 or DM 2).ti,ab.  
7 26. (DMii or DM ii).ti,ab.  
8  
9 27. (DM adj2 type).ti,ab.  
10  
11 28. or/21-27  
12 29. 20 and 28  
13  
14

### 15 **Web of Science**

16 Science Citation Index Expanded and the Science Conference Proceedings Citation Index.

17 ((

18  
19  
20 TS=(Shoulder\* NEAR/3 instability) OR TS=(Shoulder\* NEAR/3 bursitis) OR TS=(Shoulder\*  
21  
22 NEAR/3 frozen) OR TS=(Shoulder\* NEAR/3 impinge\*) OR TS=(Shoulder\* NEAR/3 tendonitis) OR TS=(Shoulder\*  
23 NEAR/3 tendinitis) OR TS=(Shoulder\* NEAR/3 pain) OR TS=(Shoulder\*

24  
25 NEAR/3 osteoarthr\*) OR TS=(Shoulder\* NEAR/3 periarthriti\*) OR TS=(Shoulder\* NEAR/3  
26  
27 "peri arthriti\*") OR TS=(Shoulder\* NEAR/3 arthralgia)

28 OR

29  
30 TS=(glenohumer\* NEAR/3 instability) OR TS=(glenohumer\* NEAR/3 bursitis) OR TS=(glenohumer\*  
31  
32 NEAR/3 frozen) OR TS=(glenohumer\* NEAR/3 impinge\*) OR TS=(glenohumer\* NEAR/3  
33  
34 tendonitis) OR TS=(glenohumer\* NEAR/3 tendinitis) OR TS=(glenohumer\* NEAR/3 pain)

35  
36 OR TS=(glenohumer\* NEAR/3 osteoarthr\*) OR TS=(glenohumer\* NEAR/3 periarthriti\*) OR  
37  
38 TS=(glenohumer\* NEAR/3 "peri arthriti\*") OR TS=(glenohumer\* NEAR/3 arthralgia)

39 OR

40  
41 TS=(subacromi\* NEAR/3 instability) OR TS=(subacromi\* NEAR/3 bursitis) OR TS=(subacromi\*  
42  
43 NEAR/3 frozen) OR TS=(subacromi\* NEAR/3 impinge\*) OR TS=(subacromi\* NEAR/3 tendonitis) OR  
44  
45 TS=(subacromi\* NEAR/3 tendinitis) OR TS=(subacromi\* NEAR/3 pain) OR TS=(subacromi\*  
46  
47 NEAR/3 osteoarthr\*) OR TS=(subacromi\* NEAR/3 periarthriti\*) OR TS=(subacromi\* NEAR/3

48  
49 "peri arthriti\*") OR TS=(subacromi\* NEAR/3 arthralgia)

50 OR

51  
52 TS=(acromi\* NEAR/3 instability) OR TS=(acromi\* NEAR/3 bursitis) OR TS=(acromi\* NEAR/3  
53  
54 frozen) OR TS=(acromi\* NEAR/3 impinge\*) OR TS=(acromi\* NEAR/3 tendonitis) OR TS=(acromi\*  
55  
56 NEAR/3 tendinitis) OR TS=(acromi\* NEAR/3 pain) OR TS=(acromi\* NEAR/3 osteoarthr\*)

57  
58 OR TS=(acromi\* NEAR/3 periarthriti\*) OR TS=(acromi\* NEAR/3 "peri arthriti\*") OR TS=(acromi\*  
59  
60 NEAR/3 arthralgia)

1  
2  
3 OR

4 TS=("rotator cuff" NEAR/3 instability) OR TS=("rotator cuff" NEAR/3 bursitis) OR TS=("rotator cuff" NEAR/3  
5 frozen) OR TS=("rotator cuff" NEAR/3 impinge\*) OR TS=("rotator cuff" NEAR/3

6  
7 tendonitis) OR TS=("rotator cuff" NEAR/3 tendinitis) OR TS=("rotator cuff" NEAR/3 pain)

8  
9 OR TS=("rotator cuff" NEAR/3 osteoarthr\*) OR TS=("rotator cuff" NEAR/3 periarthriti\*) OR

10 TS=("rotator cuff" NEAR/3 "peri arthriti\*") OR TS=("rotator cuff" NEAR/3 arthralgia)

11  
12 OR

13 TS=("Rotator cuff")

14  
15 OR

16 TS=("Adhesive capsuliti\*")

17  
18 )

19  
20 OR

21 TS=( arthralgia NEAR/3 shoulder\* or arthralgia NEAR/3 glenohumer\* or arthralgia NEAR/3

22 subacromi\* or arthralgia NEAR/3 acromi\* or arthralgia NEAR/3 "rotator cuff")

23  
24 OR TS=( pain\* NEAR/3 shoulder\* or pain\* NEAR/3 glenohumer\* or pain\* NEAR/3 subacromi\* or pain\* NEAR/3  
25 acromi\* or pain\* NEAR/3 "rotator cuff")

26  
27 )

28  
29 And

30 TS=(diabet\* or DM1 or "DM 1" or DM2 or "DM 2" or DMi or "DM i" or DMii or "DM ii" or

31  
32 DM NEAR/2 type)

33  
34  
35  
36 **CINAHL**

37 Interface: EBSCO. Filters: title or abstract

38  
39 (

40  
41 ((shoulder\* or glenohumer\* or subacromi\* or acromi\* or "rotator cuff") N3 (instability or bursitis or frozen or  
42 impinge\* or tendonitis or tendinitis or pain\* or osteoarthr\* or periarthriti\* or

43  
44 "peri arthriti\*" or arthralgia))

45  
46 OR

47 (MH "Shoulder Impingement Syndrome") OR (MH "Bursitis+") OR (MH "Rotator Cuff+") OR

48  
49 (MH "Periarthritis") OR (MH "Adhesive Capsulitis+") OR (MH "Shoulder Pain")

50  
51 OR

52 ((MH "Pain+" or pain or (MH "Arthralgia+" or arthralgia) and ((MH "Shoulder") or (MH

53  
54 "Acromioclavicular Joint") or shoulder\* or glenohumer\* or subacromi\* or acromi\* or "rotator

55  
56 cuff")

1  
2  
3 )

4 AND

5 ((MH "Diabetes Mellitus+") or diabet\* or (DMi or "DM i") or (DM1 or "DM 1") or (DMii or  
6 "DM ii") or (DM2 or "DM 2") or (DM N2 type))

9  
10  
11 **Epistemonikos**

12 Filters: title or abstract. Primary study. Not an RCT.

13  
14 ("frozen shoulder" or "shoulder impinge\*" or "shoulder bursitis" or "shoulder tendonitis" or  
15 "shoulder tendinitis" or "shoulder pain" or "pain in the shoulder" or "painful shoulder" or  
16 "shoulder osteoarthr\*" or "shoulder joint arthr\*" or "shoulder arthr")

17 OR

18 ("glenohumeral impinge\*" or "glenohumeral bursitis" or "glenohumeral tendonitis" or "glenohumeral  
19 tendinitis" or "glenohumeral pain" or "pain in the glenohumeral" or "glenohumeral  
20 osteoarthr\*" or "glenohumeral arthr\*" or "glenohumeral arthr")

21 OR

22 ("subacromial impinge\*" or "subacromial bursitis" or "subacromial tendonitis" or "subacromial  
23 tendinitis" or "subacromial pain" or "pain in the subacromial" or "subacromial osteoarthr\*" or  
24 "subacromial arthr\*" or "subacromial arthr")

25 OR

26 "Rotator cuff"

27 OR

28 "periarthriti\*"

29 OR

30 "peri arthriti\*"

31 OR

32 "Adhesive capsuliti\*"

33 )

34 AND

35 (diabet\* or DM1 or DM2 or DMi or DMii or "type 1 DM" or "type 2 DM" or "type i DM" or  
36 "type ii DM")

37  
38  
39  
40  
41  
42  
43  
44  
45  
46  
47  
48  
49  
50  
51  
52  
53  
54  
55  
56 **TRIP**

1  
2  
3 (“frozen shoulder” or “shoulder pain” or “periathriti\*” or “peri arthriti\*” or “adhesive capsuliti\*” or “shoulder  
4 impingement” or “bursitis” or “rotator cuff”) and “diabet\*”  
5

6  
7 **PEDro**

8 Filters: body part = upper arm, shoulder or shoulder girdle  
9

10 Title and abstract search: diabet\*  
11  
12

13 **Open Grey**

14 Search 1: Diabet\* and shoulder\*  
15

16 Search 2: Diabet\* and glenohumer\*  
17

18 Search 3: Diabet\* and subacromi\*  
19

20 Search 4: Diabet\* and acromi\*  
21

22 Search 5: Diabet\* and “rotator cuff\*”  
23

24 Search 6: Diabet\* and bursitis  
25

26 Search 7: Diabet\* and periarthriti\*  
27

28 Search 8: Diabet\* and “peri arthriti\*”  
29

30 Search 9: Diabet\* and “adhesive capsuliti\*”  
31

32 Search 10: Diabet\* and arthralgia  
33

34 **Grey literature report**

35 Diabet\*  
36  
37  
38  
39  
40  
41  
42  
43  
44  
45  
46  
47  
48  
49  
50  
51  
52  
53  
54  
55  
56  
57  
58  
59  
60



## Appendix B

**Fig. B.1** Bar graph of QUIPS scores for each of the six bias domains: study participation, study attrition, diabetes/risk factor (RF) measurement, frozen shoulder/outcome measurement, study confounding, statistical analysis and reporting.



## Appendix C

| <b>Table C.1</b> Raw data from each study. |                                |                    |                                                               |                                                                  |
|--------------------------------------------|--------------------------------|--------------------|---------------------------------------------------------------|------------------------------------------------------------------|
| <b>Case-Control Studies</b>                |                                |                    |                                                               |                                                                  |
| Source                                     | Number of cases                | Number of controls | Number of cases with diabetes                                 | Number of controls with diabetes                                 |
| K. L. Boyle-Walker, et al., 1997 [32]      | 32                             | 31                 | 7                                                             | 0                                                                |
| W. Li, et al., 2014 [33]                   | 182                            | 196                | 44                                                            | 18                                                               |
| S-Y. Lee, et al., 2012 [34]                | 40                             | 40                 | 6                                                             | 1                                                                |
| C. Milgrom, et al., 2008 [35]              | 126                            | 98                 | 37                                                            | 11                                                               |
| K. Wang, et al., 2013 [36]                 | 87                             | 176                | 17                                                            | 13                                                               |
| K. Kingston, et al., 2018 [37]             | 2190                           | 2190               | 572                                                           | 188                                                              |
| <b>Cohort studies</b>                      |                                |                    |                                                               |                                                                  |
| Source                                     | Number of people with diabetes | Number of controls | Number of people with diabetes that developed frozen shoulder | Number of people without diabetes that developed frozen shoulder |
| Y-P. Huang, et al., 2013 [38]              | 78,827                         | 236,481            | 946                                                           | 2254                                                             |
| S-F. Lo, et al., 2013 [39]                 | 5109                           | 20,473             | 553                                                           | 768                                                              |



## PRISMA 2020 for Abstracts Checklist

| Section and Topic       | Item # | Checklist item                                                                                                                                                                                                                                                                                        | Reported (Yes/No) |
|-------------------------|--------|-------------------------------------------------------------------------------------------------------------------------------------------------------------------------------------------------------------------------------------------------------------------------------------------------------|-------------------|
| <b>TITLE</b>            |        |                                                                                                                                                                                                                                                                                                       |                   |
| Title                   | 1      | Identify the report as a systematic review.                                                                                                                                                                                                                                                           | Y                 |
| <b>BACKGROUND</b>       |        |                                                                                                                                                                                                                                                                                                       |                   |
| Objectives              | 2      | Provide an explicit statement of the main objective(s) or question(s) the review addresses.                                                                                                                                                                                                           | Y                 |
| <b>METHODS</b>          |        |                                                                                                                                                                                                                                                                                                       |                   |
| Eligibility criteria    | 3      | Specify the inclusion and exclusion criteria for the review.                                                                                                                                                                                                                                          | Y                 |
| Information sources     | 4      | Specify the information sources (e.g. databases, registers) used to identify studies and the date when each was last searched.                                                                                                                                                                        | Y                 |
| Risk of bias            | 5      | Specify the methods used to assess risk of bias in the included studies.                                                                                                                                                                                                                              | Y                 |
| Synthesis of results    | 6      | Specify the methods used to present and synthesise results.                                                                                                                                                                                                                                           | Y                 |
| <b>RESULTS</b>          |        |                                                                                                                                                                                                                                                                                                       |                   |
| Included studies        | 7      | Give the total number of included studies and participants and summarise relevant characteristics of studies.                                                                                                                                                                                         | Y                 |
| Synthesis of results    | 8      | Present results for main outcomes, preferably indicating the number of included studies and participants for each. If meta-analysis was done, report the summary estimate and confidence/credible interval. If comparing groups, indicate the direction of the effect (i.e. which group is favoured). | Y                 |
| <b>DISCUSSION</b>       |        |                                                                                                                                                                                                                                                                                                       |                   |
| Limitations of evidence | 9      | Provide a brief summary of the limitations of the evidence included in the review (e.g. study risk of bias, inconsistency and imprecision).                                                                                                                                                           | Y                 |
| Interpretation          | 10     | Provide a general interpretation of the results and important implications.                                                                                                                                                                                                                           | Y                 |
| <b>OTHER</b>            |        |                                                                                                                                                                                                                                                                                                       |                   |
| Funding                 | 11     | Specify the primary source of funding for the review.                                                                                                                                                                                                                                                 | Y                 |
| Registration            | 12     | Provide the register name and registration number.                                                                                                                                                                                                                                                    | Y                 |

From: Page MJ, McKenzie JE, Bossuyt PM, Boutron I, Hoffmann TC, Mulrow CD, et al. The PRISMA 2020 statement: an updated guideline for reporting systematic reviews. *BMJ* 2021;372:n71. doi: 10.1136/bmj.n71

For more information, visit: <http://www.prisma-statement.org/>



## PRISMA 2020 Checklist

| Section and Topic             | Item # | Checklist item                                                                                                                                                                                                                                                                                       | Location where item is reported |
|-------------------------------|--------|------------------------------------------------------------------------------------------------------------------------------------------------------------------------------------------------------------------------------------------------------------------------------------------------------|---------------------------------|
| <b>TITLE</b>                  |        |                                                                                                                                                                                                                                                                                                      |                                 |
| Title                         | 1      | Identify the report as a systematic review.                                                                                                                                                                                                                                                          | Title                           |
| <b>ABSTRACT</b>               |        |                                                                                                                                                                                                                                                                                                      |                                 |
| Abstract                      | 2      | See the PRISMA 2020 for Abstracts checklist.                                                                                                                                                                                                                                                         | Abstract checklist attached     |
| <b>INTRODUCTION</b>           |        |                                                                                                                                                                                                                                                                                                      |                                 |
| Rationale                     | 3      | Describe the rationale for the review in the context of existing knowledge.                                                                                                                                                                                                                          | Introduction paragraph 4        |
| Objectives                    | 4      | Provide an explicit statement of the objective(s) or question(s) the review addresses.                                                                                                                                                                                                               | Introduction paragraph 4        |
| <b>METHODS</b>                |        |                                                                                                                                                                                                                                                                                                      |                                 |
| Eligibility criteria          | 5      | Specify the inclusion and exclusion criteria for the review and how studies were grouped for the syntheses.                                                                                                                                                                                          | Section 2.3                     |
| Information sources           | 6      | Specify all databases, registers, websites, organisations, reference lists and other sources searched or consulted to identify studies. Specify the date when each source was last searched or consulted.                                                                                            | Section 2.1                     |
| Search strategy               | 7      | Present the full search strategies for all databases, registers and websites, including any filters and limits used.                                                                                                                                                                                 | Appendix A                      |
| Selection process             | 8      | Specify the methods used to decide whether a study met the inclusion criteria of the review, including how many reviewers screened each record and each report retrieved, whether they worked independently, and if applicable, details of automation tools used in the process.                     | Section 2.2                     |
| Data collection process       | 9      | Specify the methods used to collect data from reports, including how many reviewers collected data from each report, whether they worked independently, any processes for obtaining or confirming data from study investigators, and if applicable, details of automation tools used in the process. | Section 2.4                     |
| Data items                    | 10a    | List and define all outcomes for which data were sought. Specify whether all results that were compatible with each outcome domain in each study were sought (e.g. for all measures, time points, analyses), and if not, the methods used to decide which results to collect.                        | Section 2.3, 2.4                |
|                               | 10b    | List and define all other variables for which data were sought (e.g. participant and intervention characteristics, funding sources). Describe any assumptions made about any missing or unclear information.                                                                                         | Section 2.4                     |
| Study risk of bias assessment | 11     | Specify the methods used to assess risk of bias in the included studies, including details of the tool(s) used, how many reviewers assessed each study and whether they worked independently, and if applicable, details of automation tools used in the process.                                    | Section 2.4                     |
| Effect measures               | 12     | Specify for each outcome the effect measure(s) (e.g. risk ratio, mean difference) used in the synthesis or presentation of results.                                                                                                                                                                  | Section 2.5                     |
| Synthesis methods             | 13a    | Describe the processes used to decide which studies were eligible for each synthesis (e.g. tabulating the study intervention characteristics and comparing against the planned groups for each synthesis (item #5)).                                                                                 | Section 2.5 lines 1-3.          |
|                               | 13b    | Describe any methods required to prepare the data for presentation or synthesis, such as handling of missing summary statistics, or data conversions.                                                                                                                                                | Section 2.5 lines 4-6           |
|                               | 13c    | Describe any methods used to tabulate or visually display results of individual studies and syntheses.                                                                                                                                                                                               | Section 2.5 line 12             |
|                               | 13d    | Describe any methods used to synthesize results and provide a rationale for the choice(s). If meta-analysis was performed, describe the model(s), method(s) to identify the presence and extent of statistical heterogeneity, and software package(s) used.                                          | Section 2.5                     |
|                               | 13e    | Describe any methods used to explore possible causes of heterogeneity among study results (e.g. subgroup analysis, meta-regression).                                                                                                                                                                 | n/a Not enough                  |



## PRISMA 2020 Checklist

| Section and Topic             | Item # | Checklist item                                                                                                                                                                                                                                                                       | Location where item is reported                               |
|-------------------------------|--------|--------------------------------------------------------------------------------------------------------------------------------------------------------------------------------------------------------------------------------------------------------------------------------------|---------------------------------------------------------------|
|                               |        |                                                                                                                                                                                                                                                                                      | studies present to do this                                    |
|                               | 13f    | Describe any sensitivity analyses conducted to assess robustness of the synthesized results.                                                                                                                                                                                         | Section 2.5 lines 14-16                                       |
| Reporting bias assessment     | 14     | Describe any methods used to assess risk of bias due to missing results in a synthesis (arising from reporting biases).                                                                                                                                                              | n/a no missing results                                        |
| Certainty assessment          | 15     | Describe any methods used to assess certainty (or confidence) in the body of evidence for an outcome.                                                                                                                                                                                | n/a                                                           |
| <b>RESULTS</b>                |        |                                                                                                                                                                                                                                                                                      |                                                               |
| Study selection               | 16a    | Describe the results of the search and selection process, from the number of records identified in the search to the number of studies included in the review, ideally using a flow diagram.                                                                                         | Section 1 paragraph 1, Figure 1                               |
|                               | 16b    | Cite studies that might appear to meet the inclusion criteria, but which were excluded, and explain why they were excluded.                                                                                                                                                          | Figure 1                                                      |
| Study characteristics         | 17     | Cite each included study and present its characteristics.                                                                                                                                                                                                                            | Table 1                                                       |
| Risk of bias in studies       | 18     | Present assessments of risk of bias for each included study.                                                                                                                                                                                                                         | Table 2                                                       |
| Results of individual studies | 19     | For all outcomes, present, for each study: (a) summary statistics for each group (where appropriate) and (b) an effect estimate and its precision (e.g. confidence/credible interval), ideally using structured tables or plots.                                                     | Figure 2                                                      |
| Results of syntheses          | 20a    | For each synthesis, briefly summarise the characteristics and risk of bias among contributing studies.                                                                                                                                                                               | Table 1                                                       |
|                               | 20b    | Present results of all statistical syntheses conducted. If meta-analysis was done, present for each the summary estimate and its precision (e.g. confidence/credible interval) and measures of statistical heterogeneity. If comparing groups, describe the direction of the effect. | Section 3 paragraph 4                                         |
|                               | 20c    | Present results of all investigations of possible causes of heterogeneity among study results.                                                                                                                                                                                       | n/a not enough studies to investigate causes of heterogeneity |
|                               | 20d    | Present results of all sensitivity analyses conducted to assess the robustness of the synthesized results.                                                                                                                                                                           | Section 3 paragraph 4, Figure 3                               |
| Reporting biases              | 21     | Present assessments of risk of bias due to missing results (arising from reporting biases) for each synthesis assessed.                                                                                                                                                              | n/a no missing results                                        |
| Certainty of evidence         | 22     | Present assessments of certainty (or confidence) in the body of evidence for each outcome assessed.                                                                                                                                                                                  | n/a                                                           |
| <b>DISCUSSION</b>             |        | For peer review only - <a href="http://bmjopen.bmj.com/site/about/guidelines.xhtml">http://bmjopen.bmj.com/site/about/guidelines.xhtml</a>                                                                                                                                           |                                                               |



## PRISMA 2020 Checklist

| Section and Topic                              | Item # | Checklist item                                                                                                                                                                                                                             | Location where item is reported                                  |
|------------------------------------------------|--------|--------------------------------------------------------------------------------------------------------------------------------------------------------------------------------------------------------------------------------------------|------------------------------------------------------------------|
| Discussion                                     | 23a    | Provide a general interpretation of the results in the context of other evidence.                                                                                                                                                          | Section 4, paragraphs 1-3                                        |
|                                                | 23b    | Discuss any limitations of the evidence included in the review.                                                                                                                                                                            | Section 4, paragraphs 4-6                                        |
|                                                | 23c    | Discuss any limitations of the review processes used.                                                                                                                                                                                      | n/a we did not come across any limitations of the review process |
|                                                | 23d    | Discuss implications of the results for practice, policy, and future research.                                                                                                                                                             | Section 4, paragraphs 7-9, Section 5.                            |
| <b>OTHER INFORMATION</b>                       |        |                                                                                                                                                                                                                                            |                                                                  |
| Registration and protocol                      | 24a    | Provide registration information for the review, including register name and registration number, or state that the review was not registered.                                                                                             | PROSPERO registration number is included in abstract             |
|                                                | 24b    | Indicate where the review protocol can be accessed, or state that a protocol was not prepared.                                                                                                                                             | PROSPERO registration number is included in abstract             |
|                                                | 24c    | Describe and explain any amendments to information provided at registration or in the protocol.                                                                                                                                            | PROSPERO registration number is included in abstract             |
| Support                                        | 25     | Describe sources of financial or non-financial support for the review, and the role of the funders or sponsors in the review.                                                                                                              | Funding section                                                  |
| Competing interests                            | 26     | Declare any competing interests of review authors.                                                                                                                                                                                         | Conflicts of interest statement                                  |
| Availability of data, code and other materials | 27     | Report which of the following are publicly available and where they can be found: template data collection forms; data extracted from included studies; data used for all analyses; analytic code; any other materials used in the review. | Appendix B, C                                                    |



## PRISMA 2020 Checklist

- 1
- 2
- 3
- 4
- 5
- 6
- 7
- 8
- 9
- 10
- 11
- 12
- 13
- 14
- 15
- 16
- 17
- 18
- 19
- 20
- 21
- 22
- 23
- 24
- 25
- 26
- 27
- 28
- 29
- 30
- 31
- 32
- 33
- 34
- 35
- 36
- 37
- 38
- 39
- 40
- 41
- 42
- 43
- 44
- 45
- 46
- 47

From: Page MJ, McKenzie JE, Bossuyt PM, Boutron I, Hoffmann TC, Mulrow CD, et al. The PRISMA 2020 statement: an updated guideline for reporting systematic reviews. *BMJ* 2021;372:n71. doi: 10.1136/bmj.n71  
For more information, visit: <http://www.prisma-statement.org/>

For peer review only
