# Supplementary material for: Diabetes as a risk factor for the onset of frozen shoulder: a systematic review and meta-analysis
Source: PubMed Central journal article supplement (PMC9815013; doi:10.1136/bmjopen-2022-062377), 2023-01-04
Supplement: bmjopen-2022-062377supp001.pdf [file bmjopen-2022-062377supp001.pdf]

## Appendix A

The following searches were originally conducted in December 2018 and updated in June 2021.

### MEDLINE

Interface: OVID.

1. ((shoulder\* or glenohumer\* or subacromi\* or acromi\* or rotator cuff) adj3 (instability or bursitis or frozen or impinge\* or tendonitis or tendinitis or pain\* or osteoarthr\* or periarthriti\* or periarthriti\* or arthralgia)).ti,ab,kw.

2. Shoulder Impingement Syndrome/

3. exp Bursitis/

4. Rotator Cuff/

5. adhesive capsuliti\*.ti,ab,kw.

6. Shoulder Pain/

7. or/1-6

8. exp Pain/

9. pain\*.ti,ab,kw.

10. Arthralgia/

11. arthralgia.ti,ab,kw.

12. or/8-11

13. Shoulder/

14. Shoulder joint/

15. Acromioclavicular Joint/

16. (shoulder\* or glenohumer\* or subacromi\* or acromi\* or rotator cuff).ti,ab,kw.

17. or/13-16

18. 12 and 17

19. 7 or 18

20. exp Diabetes Mellitus/

21. diabet\*.ti,ab,kw.

22. (DMi or DM i).ti,ab,kw.

23. (DM1 or DM 1).ti,ab,kw.

24. (DM2 or DM 2).ti,ab,kw.

25. (DMii or DM ii).ti,ab,kw.

26. (DM adj2 type).ti,ab,kw.

27. or/20-26

28. 19 and 27

29. exp animals/ not humans/

30. 28 not 29

#### EMBASE

Interface: OVID.

1. ((shoulder\* or glenohumer\* or subacromi\* or acromi\* or rotator cuff) adj3 (instability or bursitis or frozen or impinge\* or tendonitis or tendinitis or pain\* or osteoarthr\* or periarthriti\* or peri arthriti\* or arthralgia)).ti,ab,kw.

2. exp shoulder impingement syndrome/

3. exp bursitis/

4. exp rotator cuff/

5. exp humeroscapular periarthritis/

6. adhesive capsuliti\*.ti,ab,kw.

7. exp shoulder pain/

8. or/1-7

9. exp pain/

10. pain\*.ti,ab,kw.

11. exp arthralgia/

12. arthralgia.ti,ab,kw.

13. or/9-12

14. exp shoulder/

15. Acromioclavicular Joint/

16. (shoulder\* or glenohumer\* or subacromi\* or acromi\* or rotator cuff).ti,ab,kw.

17. or/14-16

18. 13 and 17

19. 8 or 18

20. exp Diabetes Mellitus/

21. diabet\*.ti,ab,kw.

22. (DMi or DM i).ti,ab,kw.

23. (DM1 or DM 1).ti,ab,kw.

24. (DM2 or DM 2).ti,ab,kw.

25. (DMii or DM ii).ti,ab,kw.

26. (DM adj2 type).ti,ab,kw.
27. or/20-26
28. 19 and 27
29. exp animals/ not humans/
30. 28 not 29
31. limit 30 to embase

**AMED**

Interface: OVID.

1. ((shoulder\* or glenohumer\* or subacromi\* or acromi\* or rotator cuff) adj3 (instability or bursitis or frozen or impinge\* or tendonitis or tendinitis or pain\* or osteoarthr\* or periarthriti\* or peri arthriti\* or arthralgia)).ti,ab.
2. exp Shoulder impingement syndrome/
3. exp Bursitis/
4. exp Rotator cuff/
5. adhesive capsuliti\*.ti,ab.
6. exp shoulder pain/
7. or/1-6
8. exp Pain/
9. pain\*.ti,ab.
10. exp Arthralgia/
11. arthralgia.ti,ab.
12. or/8-11
13. shoulder/
14. (shoulder\* or glenohumer\* or subacromi\* or acromi\* or rotator cuff).ti,ab.
15. or/13-14
16. 12 and 15
17. 7 or 16
18. exp Diabetes mellitus/
19. diabet\*.ti,ab.
20. (DMi or DM i).ti,ab.
21. (DM1 or DM 1).ti,ab.
22. (DM2 or DM 2).ti,ab.

23. (DMii or DM ii).ti,ab.
24. (DM adj2 type).ti,ab.
25. or/18-24
26. 17 and 25
27. exp animals/ not humans/
28. 26 not 27

**PsycINFO**

Interface: OVID.

1. ((shoulder\* or glenohumer\* or subacromi\* or acromi\* or rotator cuff) adj3 (instability or bursitis or frozen or impinge\* or tendonitis or tendinitis or pain\* or osteoarthr\* or periarthriti\* or peri arthriti\* or arthralgia)).ti,ab.
2. Shoulder Impingement Syndrome.ti,ab.
3. bursitis.ti,ab.
4. rotator cuff.ti,ab.
5. adhesive capsuliti\*.ti,ab.
6. shoulder pain.ti,ab.
7. or/1-6
8. exp PAIN/
9. pain\*.ti,ab.
10. arthralgia.ti,ab.
11. or/8-10
12. \*"shoulder (anatomy)"/
13. shoulder\*.ti,ab.
14. shoulder joint.ti,ab.
15. acromi\*.ti,ab.
16. glenohumer\*.ti,ab.
17. subacromi\*.ti,ab.
18. or/12-17
19. 11 and 18
20. 7 or 19
21. exp DIABETES MELLITUS/
22. diabet\*.ti,ab.

23. (DMi or DM i).ti,ab.  
 24. (DM1 or DM 1).ti,ab.  
 25. (DM2 or DM 2).ti,ab.  
 26. (DMii or DM ii).ti,ab.  
 27. (DM adj2 type).ti,ab.  
 28. or/21-27  
 29. 20 and 28

### Web of Science

Science Citation Index Expanded and the Science Conference Proceedings Citation Index.

((

TS=(Shoulder\* NEAR/3 instability) OR TS=(Shoulder\* NEAR/3 bursitis) OR TS=(Shoulder\* NEAR/3 frozen) OR TS=(Shoulder\* NEAR/3 impinge\*) OR TS=(Shoulder\* NEAR/3 tendonitis) OR TS=(Shoulder\* NEAR/3 tendinitis) OR TS=(Shoulder\* NEAR/3 pain) OR TS=(Shoulder\* NEAR/3 osteoarthr\*) OR TS=(Shoulder\* NEAR/3 periarthriti\*) OR TS=(Shoulder\* NEAR/3 "peri arthriti\*") OR TS=(Shoulder\* NEAR/3 arthralgia)

OR

TS=(glenohumer\* NEAR/3 instability) OR TS=(glenohumer\* NEAR/3 bursitis) OR TS=(glenohumer\* NEAR/3 frozen) OR TS=(glenohumer\* NEAR/3 impinge\*) OR TS=(glenohumer\* NEAR/3 tendonitis) OR TS=(glenohumer\* NEAR/3 tendinitis) OR TS=(glenohumer\* NEAR/3 pain) OR TS=(glenohumer\* NEAR/3 osteoarthr\*) OR TS=(glenohumer\* NEAR/3 periarthriti\*) OR TS=(glenohumer\* NEAR/3 "peri arthriti\*") OR TS=(glenohumer\* NEAR/3 arthralgia)

OR

TS=(subacromi\* NEAR/3 instability) OR TS=(subacromi\* NEAR/3 bursitis) OR TS=(subacromi\* NEAR/3 frozen) OR TS=(subacromi\* NEAR/3 impinge\*) OR TS=(subacromi\* NEAR/3 tendonitis) OR TS=(subacromi\* NEAR/3 tendinitis) OR TS=(subacromi\* NEAR/3 pain) OR TS=(subacromi\* NEAR/3 osteoarthr\*) OR TS=(subacromi\* NEAR/3 periarthriti\*) OR TS=(subacromi\* NEAR/3 "peri arthriti\*") OR TS=(subacromi\* NEAR/3 arthralgia)

OR

TS=(acromi\* NEAR/3 instability) OR TS=(acromi\* NEAR/3 bursitis) OR TS=(acromi\* NEAR/3 frozen) OR TS=(acromi\* NEAR/3 impinge\*) OR TS=(acromi\* NEAR/3 tendonitis) OR TS=(acromi\* NEAR/3 tendinitis) OR TS=(acromi\* NEAR/3 pain) OR TS=(acromi\* NEAR/3 osteoarthr\*) OR TS=(acromi\* NEAR/3 periarthriti\*) OR TS=(acromi\* NEAR/3 "peri arthriti\*") OR TS=(acromi\* NEAR/3 arthralgia)

OR

TS=("rotator cuff" NEAR/3 instability) OR TS=("rotator cuff" NEAR/3 bursitis) OR TS=("rotator cuff" NEAR/3 frozen) OR TS=("rotator cuff" NEAR/3 impinge\*) OR TS=("rotator cuff" NEAR/3

tendonitis) OR TS=("rotator cuff" NEAR/3 tendinitis) OR TS=("rotator cuff" NEAR/3 pain)

OR TS=("rotator cuff" NEAR/3 osteoarthr\*) OR TS=("rotator cuff" NEAR/3 periarthriti\*) OR

TS=("rotator cuff" NEAR/3 "peri arthriti\*") OR TS=("rotator cuff" NEAR/3 arthralgia)

OR

TS=("Rotator cuff")

OR

TS=("Adhesive capsuliti\*")

)

OR

TS=( arthralgia NEAR/3 shoulder\* or arthralgia NEAR/3 glenohumer\* or arthralgia NEAR/3

subacromi\* or arthralgia NEAR/3 acromi\* or arthralgia NEAR/3 "rotator cuff")

OR TS=( pain\* NEAR/3 shoulder\* or pain\* NEAR/3 glenohumer\* or pain\* NEAR/3 subacromi\* or pain\* NEAR/3 acromi\* or pain\* NEAR/3 "rotator cuff")

)

And

TS=(diabet\* or DM1 or "DM 1" or DM2 or "DM 2" or DMi or "DM i" or DMii or "DM ii" or

DM NEAR/2 type)

## CINAHL

Interface: EBSCO. Filters: title or abstract

(

((shoulder\* or glenohumer\* or subacromi\* or acromi\* or "rotator cuff") N3 (instability or bursitis or frozen or impinge\* or tendonitis or tendinitis or pain\* or osteoarthr\* or periarthriti\* or

"peri arthriti\*" or arthralgia))

OR

(MH "Shoulder Impingement Syndrome") OR (MH "Bursitis+") OR (MH "Rotator Cuff+") OR

(MH "Periarthritis") OR (MH "Adhesive Capsulitis+") OR (MH "Shoulder Pain")

OR

((MH "Pain+" or pain or (MH "Arthralgia+") or arthralgia) and ((MH "Shoulder") or (MH

"Acromioclavicular Joint") or shoulder\* or glenohumer\* or subacromi\* or acromi\* or "rotator

cuff")

)

AND

((MH "Diabetes Mellitus+") or diabet\* or (DMi or "DM i") or (DM1 or "DM 1") or (DMii or "DM ii") or (DM2 or "DM 2") or (DM N2 type))

### Epistemonikos

Filters: title or abstract. Primary study. Not an RCT.

((("frozen shoulder" or "shoulder impinge\*" or "shoulder bursitis" or "shoulder tendonitis" or "shoulder tendinitis" or "shoulder pain" or "pain in the shoulder" or "painful shoulder" or "shoulder osteoarthr\*" or "shoulder joint arthr\*" or "shoulder arthr")

OR

("glenohumeral impinge\*" or "glenohumeral bursitis" or "glenohumeral tendonitis" or "glenohumeral tendinitis" or "glenohumeral pain" or "pain in the glenohumeral" or "glenohumeral osteoarthr\*" or "glenohumeral arthr\*" or "glenohumeral arthr")

OR

("subacromial impinge\*" or "subacromial bursitis" or "subacromial tendonitis" or "subacromial tendinitis" or "subacromial pain" or "pain in the subacromial" or "subacromial osteoarthr\*" or "subacromial arthr\*" or "subacromial arthr")

OR

"Rotator cuff"

OR

"periarthriti\*"

OR

"peri arthriti\*"

OR

"Adhesive capsuliti\*"

)

AND

(diabet\* or DM1 or DM2 or DMi or DMii or "type 1 DM" or "type 2 DM" or "type i DM" or "type ii DM")

TRIP

("frozen shoulder" or "shoulder pain" or "periathriti\*" or "peri arthriti\*" or "adhesive capsuliti\*" or "shoulder impingement" or "bursitis" or "rotator cuff") and "diabet\*"

**PEDro**

Filters: body part = upper arm, shoulder or shoulder girdle

Title and abstract search: diabet\*

**Open Grey**

Search 1: Diabet\* and shoulder\*

Search 2: Diabet\* and glenohumer\*

Search 3: Diabet\* and subacromi\*

Search 4: Diabet\* and acromi\*

Search 5: Diabet\* and "rotator cuff"

Search 6: Diabet\* and bursitis

Search 7: Diabet\* and periarthriti\*

Search 8: Diabet\* and "peri arthriti\*"

Search 9: Diabet\* and "adhesive capsuliti\*"

Search 10: Diabet\* and arthralgia

**Grey literature report**

Diabet\*



**Appendix B**

**Fig. B.1** Bar graph of QUIPS scores for each of the six bias domains: study participation, study attrition, diabetes/risk factor (RF) measurement, frozen shoulder/outcome measurement, study confounding, statistical analysis and reporting.

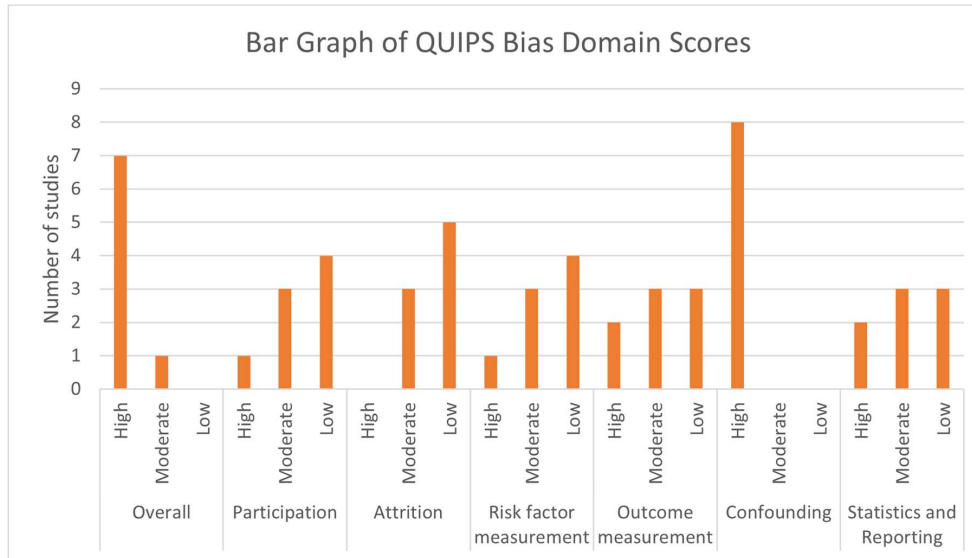

## Appendix C

| Table C.1 Raw data from each study.   |                                |                    |                                                               |                                                                  |
|---------------------------------------|--------------------------------|--------------------|---------------------------------------------------------------|------------------------------------------------------------------|
| Case-Control Studies                  |                                |                    |                                                               |                                                                  |
| Source                                | Number of cases                | Number of controls | Number of cases with diabetes                                 | Number of controls with diabetes                                 |
| K. L. Boyle-Walker, et al., 1997 [32] | 32                             | 31                 | 7                                                             | 0                                                                |
| W. Li, et al., 2014 [33]              | 182                            | 196                | 44                                                            | 18                                                               |
| S-Y. Lee, et al., 2012 [34]           | 40                             | 40                 | 6                                                             | 1                                                                |
| C. Milgrom, et al., 2008 [35]         | 126                            | 98                 | 37                                                            | 11                                                               |
| K. Wang, et al., 2013 [36]            | 87                             | 176                | 17                                                            | 13                                                               |
| K. Kingston, et al., 2018 [37]        | 2190                           | 2190               | 572                                                           | 188                                                              |
| Cohort studies                        |                                |                    |                                                               |                                                                  |
| Source                                | Number of people with diabetes | Number of controls | Number of people with diabetes that developed frozen shoulder | Number of people without diabetes that developed frozen shoulder |
| Y-P. Huang, et al., 2013 [38]         | 78,827                         | 236,481            | 946                                                           | 2254                                                             |
| S-F. Lo, et al., 2013 [39]            | 5109                           | 20,473             | 553                                                           | 768                                                              |
